# Supplementary material for: Brønsted acid-catalyzed cascade cyclization: an efficient strategy for divergent synthesis of cyclohepta[b]indole derivatives
Source: Royal Society of Chemistry journal article supplement (doi:10.1039/d2gc02072f), 2022-01-01

## Supporting Information

### Brønsted acid-catalyzed cascade cyclization: an efficient strategy for divergent synthesis of cyclohepta[*b*]indole derivatives

Shaomin Chen,<sup>a</sup> Zhiyan Chen,<sup>a</sup> Tianjian Zhang,<sup>a</sup> Bo Zhao,<sup>a</sup> Bo You,<sup>a</sup> Minghao Li<sup>\*a</sup> and Yanlong Gu<sup>\*a,b,c</sup>

<sup>a</sup> Key Laboratory for Large-Format Battery Materials and System, Ministry of Education, School of Chemistry and Chemical Engineering, Huazhong University of Science and Technology, 430074, Wuhan, China.

<sup>b</sup> School of Chemistry and Chemical Engineering, The Key Laboratory for Green Processing of Chemical Engineering of Xinjiang Bingtuan, Shihezi University, Shihezi City 832004, China.

<sup>c</sup> State Key Laboratory for Oxo Synthesis and Selective Oxidation, Lanzhou Institute of Chemical Physics, 730000, Lanzhou, China.

Corresponding authors: M. Li (liminghaochem@hust.edu.cn) and Y. Gu (klgyl@hust.edu.cn)

#### Table of contents

|                                                 |     |
|-------------------------------------------------|-----|
| 1. General information .....                    | S2  |
| 2. Preparation of materials.....                | S2  |
| 3. Optimization of the reaction conditions..... | S4  |
| 4. General procedure .....                      | S5  |
| 5. Derivatization of products.....              | S7  |
| 6. Mechanism study.....                         | S8  |
| 7. X-ray crystallographic analysis .....        | S11 |
| 8. Evaluation of green metrics .....            | S12 |
| 9. Characterization data of products.....       | S16 |
| 10. References .....                            | S30 |
| 11. Copies of NMR spectra .....                 | S31 |

## 1. General information

Unless otherwise noted, all reagents were purchased from commercial suppliers and used without further purification. The reactions were monitored by TLC with Haiyang GF-254 silica gel plates (Qingdao Haiyang chemical industry Co. Ltd, Qingdao, China) using UV light or  $\text{KMnO}_4$  as visualizing agents as needed. Flash column chromatography was performed using 200-300 mesh silica gel at increased pressure.  $^1\text{H}$  NMR spectra and  $^{13}\text{C}$  NMR spectra were respectively recorded on Brüker AV-400 spectrometers. Chemical shifts ( $\delta$ ) were expressed in ppm relative to  $\text{Me}_4\text{Si}$  in  $\text{CDCl}_3$ , and coupling constants ( $J$ ) were reported in Hz. High-resolution mass spectra (HRMS) were recorded on Brüker Compass Data Analysis 4.0. IR spectra were recorded on a Bruker FT-IR (EQUINOX 55) using KBr pellets or neat liquid technology.

## 2. Preparation of materials.

### 2.1 Preparation of bis(indolyl)methane (BIM)

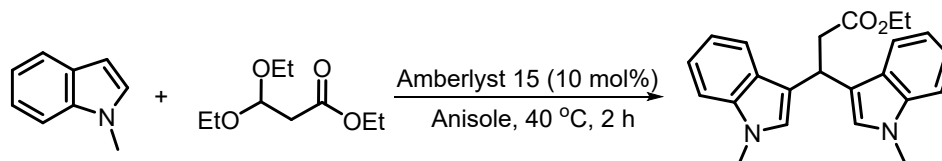

To the solution of *N*-methylindole (1.31 g, 10 mmol) in anisole (15.0 mL) was added ethyl 3,3-diethoxypropionate (0.95 g, 5 mmol) and Amberlyst 15 (0.11g, 0.5 mmol). The reaction mixture was stirred at 40 °C for 2 h. After the completion of the reaction, resulting mixture was extracted with ethyl acetate, washed with water, and then concentrated by removing the solvent under vacuum. Finally, the residue was purified by column chromatography (PE/EA = 5/1) to afford the desired BIM (94%).

### 2.2 Preparation of atropaldehyde acetal

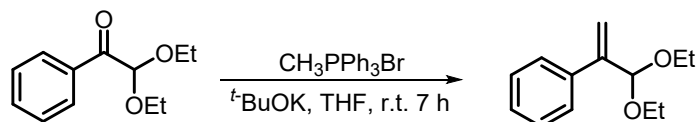

According to literature report,<sup>1</sup> atropaldehyde acetal was synthesized by the methods below:

A suspension of 8.57 g (24 mmol) of methyltriphenylphosphonium bromide and 2.69 g (24 mmol) of potassium *t*-butoxide in 35 mL of dried THF was stirred at room temperature for 30 min. Subsequently, 4.16 g (20 mmol) of 2,2-diethoxyacetophenone was added, and the reaction mixture

was stirred at room temperature for 7 h. The reaction mixture was then filtered through a pad of Celite and the filtrate was concentrated on a rotary evaporator and then purified by silica gel column chromatography (PE/EA = 20/1) to give the pure product.

### 2.3 Preparation of 3-vinylindole

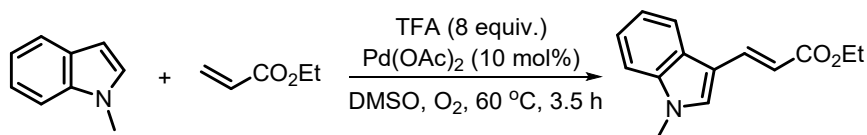

According to literature report,<sup>2</sup> atropaldehyde acetal was synthesized by the methods below:

A sealed tube containing N-methylindoles (1 mmol) and Pd(OAc)<sub>2</sub> (10 mol %), was evacuated and filled with dioxygen gas using an oxygen containing balloon. Then, DMSO (5.0 mL) and trifluoroacetic acid (TFA) (8.0 mmol) were sequentially added to the system via syringe under an oxygen atmosphere. After that, ethyl acrylate (1.50 mmol) was added and the reaction mixture was stirred at 60 °C until completion of the reaction (TLC). Then the reaction was cooled to room temperature and partitioned between water and ethyl acetate. The layers were separated and the organic layer was washed with aqueous saturated brine solution, dried over MgSO<sub>4</sub>, filtered and concentrated under reduced pressure. Finally, the residue was purified by column chromatography (PE/EA = 20/1) to afford the desired C-3 alkenylated indole product (83%).

### 2.4 Preparation of 2-aryl 3,4-dihydropyran

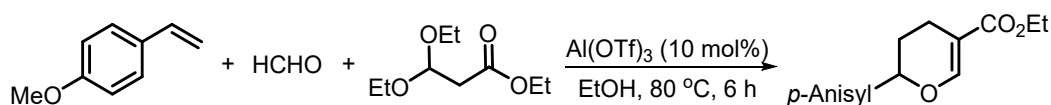

According to similar literature reports,<sup>3</sup> 2-aryl 3,4-dihydropyran was synthesized by the methods below:

The synthesis was performed in a 25 ml of round bottomed flask equipped with magnetic stirring. 4-Methoxystyrene (1.34 g, 10 mmol), ethyl 3,3-diethoxypropionate (1.9 g, 10 mmol) and an aqueous solution of formaldehyde (30 wt %, 4.0 g, 40 mmol) were mixed in EtOH (15 mL), and then stirred at 80 °C for 6 hours. After the completion of the reaction, resulting mixture was extracted with ethyl acetate, washed with water, and then concentrated by removing the solvent under vacuum. Finally, the residue was purified by column chromatography (PE/EA = 10/1) to afford the desired 2-aryl 3,4-dihydropyran (86%).

### 3. Optimization of the reaction conditions

**Table S1** Optimization of the reaction of **4a**, **5a** and **2a** for the synthesis of **3a**.<sup>a</sup>

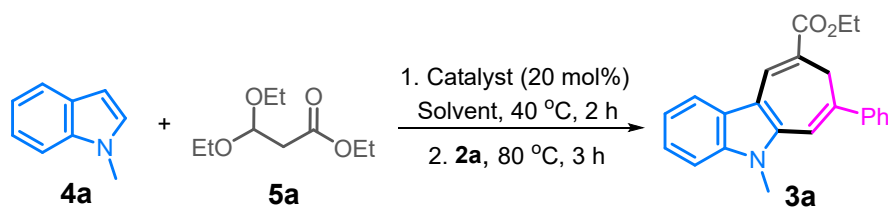

| Entry           | Catalyst             | Solvent     | Ratio ( <b>4a</b> / <b>5a</b> / <b>2a</b> ) | Yield (%) <sup>b</sup> |
|-----------------|----------------------|-------------|---------------------------------------------|------------------------|
| 1               | ZnCl <sub>2</sub>    | Toluene     | 1 : 1 : 1                                   | Trace                  |
| 2               | FeCl <sub>3</sub>    | Toluene     | 1 : 1 : 1                                   | Messy                  |
| 3               | BiCl <sub>3</sub>    | Toluene     | 1 : 1 : 1                                   | Messy                  |
| 4               | Sc(OTf) <sub>3</sub> | Toluene     | 1 : 1 : 1                                   | 28                     |
| 5               | Bi(OTf) <sub>3</sub> | Toluene     | 1 : 1 : 1                                   | 45                     |
| 6               | PTSA                 | Toluene     | 1 : 1 : 1                                   | 63                     |
| 7               | MsOH                 | Toluene     | 1 : 1 : 1                                   | 51                     |
| 8               | Amberlyst 15         | Toluene     | 1 : 1 : 1                                   | 35                     |
| 9               | PTSA                 | DCE         | 1 : 1 : 1                                   | 43                     |
| 10              | PTSA                 | 1,4-Dioxane | 1 : 1 : 1                                   | 48                     |
| 11              | PTSA                 | Anisole     | 1 : 1 : 1                                   | 67, (65) <sup>c</sup>  |
| 12              | PTSA                 | PhCl        | 1 : 1 : 1                                   | 56                     |
| 13 <sup>c</sup> | PTSA                 | Anisole     | 1.2 : 1 : 1                                 | 72                     |
| 14 <sup>c</sup> | PTSA                 | Anisole     | 1.5 : 1 : 1.2                               | 80                     |
| 15 <sup>c</sup> | PTSA                 | Anisole     | 2 : 1 : 1.5                                 | 84                     |

<sup>a</sup> Unless otherwise noted, all reactions were performed in one pot stepwise manner. Reaction conditions: a mixture of **4a** (0.2 mmol), **5a** (0.2 mmol) and catalyst (20 mol%) was firstly stirred in solvent (1 mL) at 40 °C for 2 h, and then **2a** (0.2 mmol) was added, and the mixture was stirred at 80 °C for another 3 h. <sup>b</sup> Isolated yield based on **5a**. <sup>c</sup> PTSA, 0.02 mmol.

**Table S2** Optimization of the reaction of **4a**, **7a** and **2a** for the synthesis of **8a**.<sup>a</sup>

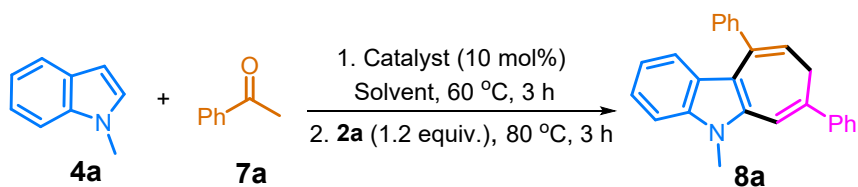

| Entry | Catalyst             | Solvent | Yield (%) <sup>b</sup> |
|-------|----------------------|---------|------------------------|
| 1     | Al(OTf) <sub>3</sub> | Anisole | 28                     |
| 2     | AlCl <sub>3</sub>    | Anisole | ND                     |
| 3     | PTSA                 | Anisole | 59                     |
| 4     | MsOH                 | Anisole | 42                     |
| 5     | TfOH                 | Anisole | Trace                  |

|    |      |                    |       |
|----|------|--------------------|-------|
| 6  | PTSA | CH <sub>3</sub> CN | 27    |
| 7  | PTSA | DCE                | ND    |
| 8  | PTSA | 1,4-Dioxane        | 12    |
| 9  | PTSA | EtOH               | Trace |
| 10 | PTSA | DEC                | 31    |

<sup>a</sup> Unless otherwise noted, all reactions were performed in one pot stepwise manner. Reaction conditions: a mixture of **4a** (0.2 mmol), **7a** (0.2 mmol) and catalyst (10 mol%) was firstly stirred in solvent (1 mL) at 60 °C for 3 h, and then **2a** (0.24 mmol) was added, and the mixture was stirred at 80 °C for another 3 h. <sup>b</sup> Isolated yield based on **4a**. DEC = Diethyl carbonate. ND = No desired product.

**Table S3** Optimization of the reaction of **4a** and **9a** for the synthesis of **10a**.<sup>a</sup>

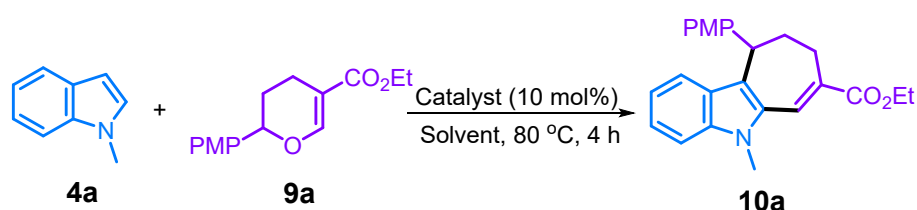

| Entry           | Catalyst             | Solvent                         | Yield (%) <sup>b</sup> |
|-----------------|----------------------|---------------------------------|------------------------|
| 1               | Al(OTf) <sub>3</sub> | EtOH                            | 23                     |
| 2               | AlCl <sub>3</sub>    | EtOH                            | 17                     |
| 3               | TFA                  | EtOH                            | Trace                  |
| 4               | PTSA                 | EtOH                            | 46, (85) <sup>c</sup>  |
| 5               | TfOH                 | EtOH                            | 55, (88) <sup>c</sup>  |
| 6 <sup>c</sup>  | TfOH                 | <i>i</i> PrOH                   | 63                     |
| 7 <sup>c</sup>  | TfOH                 | CH <sub>3</sub> CN              | 34                     |
| 8 <sup>c</sup>  | TfOH                 | 1,4-Dioxane                     | 56                     |
| 9 <sup>c</sup>  | TfOH                 | DCE                             | 23                     |
| 10 <sup>c</sup> | TfOH                 | CH <sub>3</sub> NO <sub>2</sub> | 19                     |
| 11 <sup>c</sup> | TfOH                 | Toluene                         | 74                     |

<sup>a</sup> Unless otherwise noted, all reactions were performed with **4a** (0.36 mmol), **9a** (0.3 mmol), catalyst (10 mol%), solvent (1 mL) in sealed tube at 80 °C for 4 h. <sup>b</sup> Isolated yield. <sup>c</sup> Performing the reaction at 100 °C.

## 4. General procedure

### 4.1 General procedure for the synthesis of compounds **3** in two separate steps

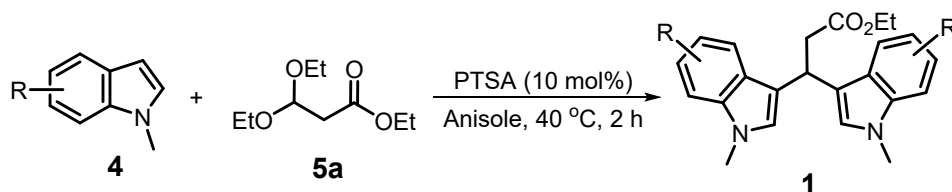

The reactions were conducted in a 10 mL of V-type flask equipped with oil bath and triangle magnetic stirring. The mixture of **4** (0.3 mmol), **5a** (0.2 mmol) and PTSA (0.02 mmol, 10 mol%) in anisole (1 mL) was stirred at 40 °C for 2 h. Subsequently, the resulting mixture was extracted with 5 mL ethyl acetate, washed with 2 mL water, and then concentrated by removing the solvent under vacuum. Finally, the residue was purified by silica gel column chromatography using PE/EA as eluent to afford the desired product BIM **1**.

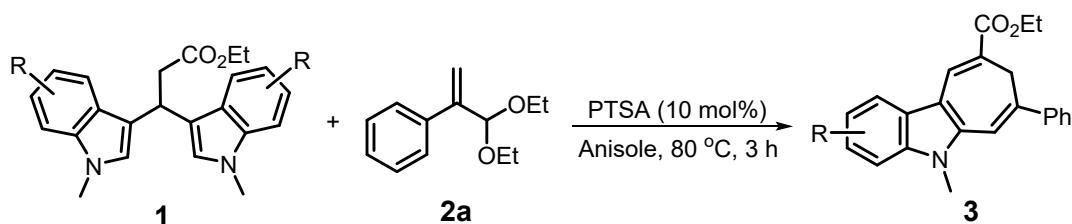

The reactions were conducted in a 10 mL of V-type flask equipped with oil bath and triangle magnetic stirring. The resulting BIM **1** was mixed with **2a** (1.2 equiv.) and PTSA (10 mol%) in anisole (0.5 mL) and was stirred at 80 °C for 3 h. Subsequently, the resulting mixture was extracted with 4 mL ethyl acetate, washed with 2 mL water, and then concentrated by removing the solvent under vacuum. Finally, the residue was purified by silica gel column chromatography using PE/EA as eluent to afford the desired product **3**.

#### 4.2 General procedure for the synthesis of compounds **3** in one-pot manner

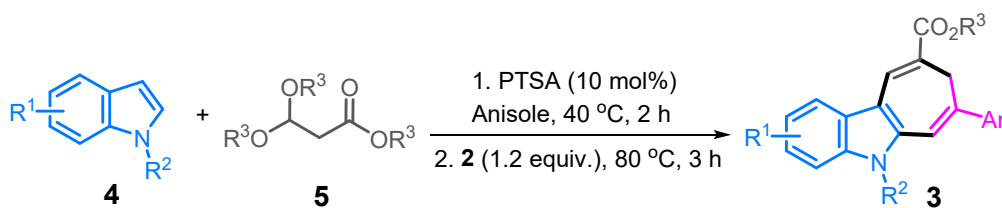

The reactions were conducted in a 10 mL of V-type flask equipped with oil bath and triangle magnetic stirring. The mixture of **4** (0.3 mmol), **5** (0.2 mmol) and PTSA (0.02 mmol, 10 mol%) in anisole (1 mL) was stirred at 40 °C for 2 h. Subsequently, **2** (0.24 mmol) was added to the mixture and stirred at 80 °C for another 3 h. After the completion of the reaction, the mixture cooled to room temperature, and the resulting mixture was extracted with 5 mL ethyl acetate, washed with 2 mL water, and then concentrated by removing the solvent under vacuum. Finally, the residue was purified by silica gel column chromatography using PE/EA as eluent to afford the desired product.

#### 4.3 General procedure for the synthesis of compounds **8** in one-pot manner

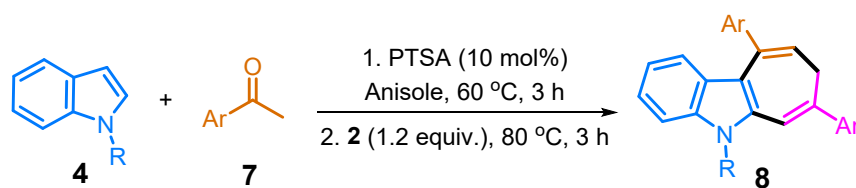

The reactions were conducted in a 10 mL of V-type flask equipped with oil bath and triangle magnetic stirring. The mixture of **4** (0.2 mmol), **7** (0.2 mmol) and PTSA (0.02 mmol, 10 mol%) in anisole (1 mL) was stirred at 60 °C for 3 h. Subsequently, **2** (0.24 mmol) was added to the mixture and stirred at 80 °C for another 3 h. After the completion of the reaction, the mixture cooled to room temperature, and the resulting mixture was extracted with 5 mL ethyl acetate, washed with 2 mL water, and then concentrated by removing the solvent under vacuum. Finally, the residue was purified by silica gel column chromatography using PE/EA as eluent to afford the desired product.

#### 4.4 General procedure for the synthesis of compounds 10

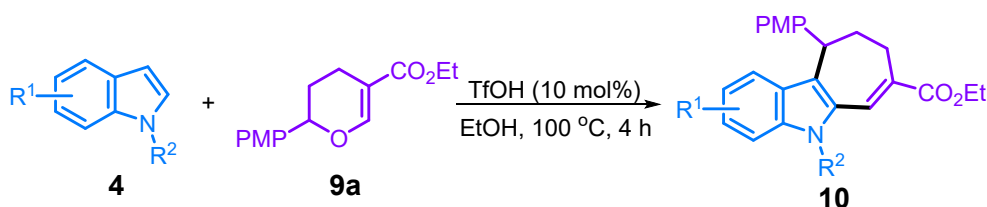

The reactions were conducted in a 15 mL 15mL glass pressure tube equipped with oil bath and magnetic stirring. The mixture of **4** (0.36 mmol), **9a** (0.30 mmol) and TfOH (0.03 mmol, 10 mol%) in EtOH (1 mL) was stirred at 100 °C for 4 h. After the completion of the reaction, the mixture cooled to room temperature, and the resulting mixture was extracted with 5 mL ethyl acetate, washed with 2 mL water, and then concentrated by removing the solvent under vacuum. Finally, the residue was purified by silica gel column chromatography using PE/EA as eluent to afford the desired product.

### 5. Derivatization of products

#### 5.1 The reduction of 3a

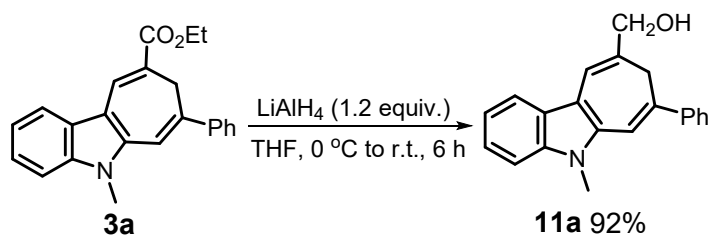

To the suspension of LiAlH<sub>4</sub> (0.24 mmol) in THF (1.5 mL) was added dropwise a solution of **3a**

(0.2 mmol) in THF (1 mL) at 0 °C with continual stirring. Subsequently, the mixture was allowed to raise to room temperature, and stirred for 6 h. The reaction mixture was quenched with an aqueous NH<sub>4</sub>Cl solution, worked up with EA and purified by silica gel column chromatography (PE/EA = 5/1 as eluent) to afford the desired alcohol product **11a** with 92% yield.

## 5.2 The oxidation of 10a

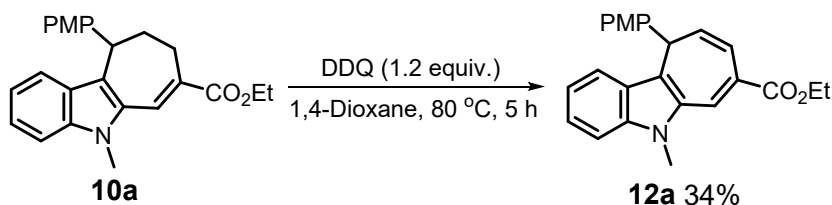

The reactions were conducted in a 10 mL of V-type flask equipped with oil bath and triangle magnetic stirring. The mixture of **10a** (0.2 mmol) and DDQ (0.24 mmol) in 1,4-dioxane (1 mL) was stirred at 80 °C for 5 h. After the completion of the reaction, the mixture cooled to room temperature, and the resulting mixture was filtered. Afterwards, the filtrate was extracted with ethyl acetate, washed with water, and then concentrated by removing the solvent under vacuum. Finally, the residue was purified by silica gel column chromatography (PE/EA = 12/1 as eluent) as eluent to afford the desired product **12a** with 34% yield.

## 6. Mechanism study

### 6.1 The synthesis of compounds 3 from 2a and 6a

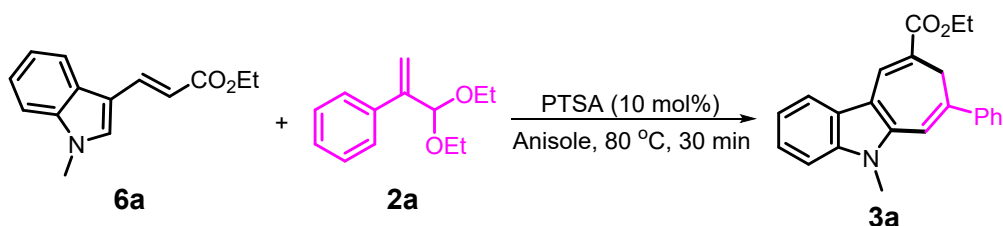

The reactions were conducted in a 10 mL of V-type flask equipped with oil bath and triangle magnetic stirring. The mixture of **6a** (0.2 mmol), **2a** (0.2 mmol) and PTSA (0.02 mmol, 10 mol%) in anisole (1 mL) was stirred at 80 °C for 30 min. After that, the mixture cooled to room temperature, and the resulting mixture was extracted with ethyl acetate, washed with water, and then concentrated by removing the solvent under vacuum. Finally, the residue was purified by silica gel column chromatography using PE/EA as eluent to afford the product **3a** with 92% yield.

## 6.2 The products detected by HRMS in the reaction of 4a and 5a

The reactions were conducted in a 10 mL of V-type flask equipped with oil bath and triangle



magnetic stirring. The mixture of **4a** (0.3 mmol), **5a** (0.2 mmol) and PTSA (0.02 mmol, 10 mol%) in anisole (1 mL) was stirred at 40 °C for 2 h. Subsequently, the resulting mixture was extracted with ethyl acetate, washed with water, and then concentrated by removing the solvent under vacuum. Then the mixture was detected by HRMS.

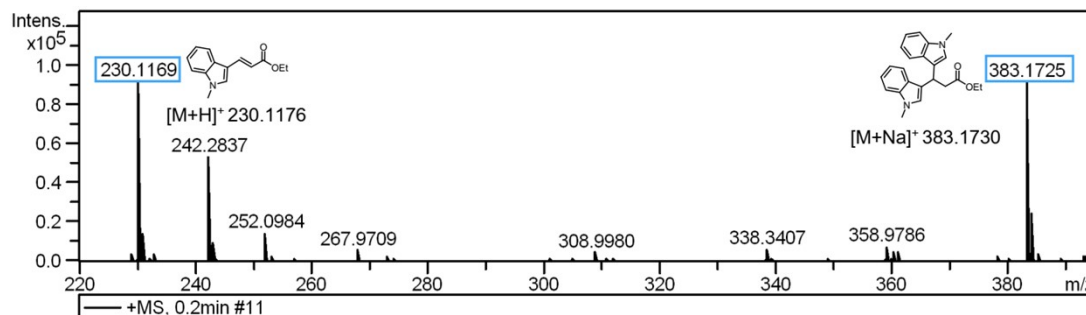

**Fig. S1** The products detected by HRMS in the reaction of **4a** and **5a**.

### 6.3 The products detected by HRMS in the reaction of **4a** and **7a**

The reactions were conducted in a 10 mL of V-type flask equipped with oil bath and triangle magnetic stirring. The mixture of **4a** (0.2 mmol), **7a** (0.2 mmol) and PTSA (0.02 mmol, 10 mol%) in anisole (1 mL) was stirred at 60 °C for 3 h. Subsequently, the resulting mixture was extracted with ethyl acetate, washed with water, and then concentrated by removing the solvent under vacuum. Then the mixture was detected by HRMS.

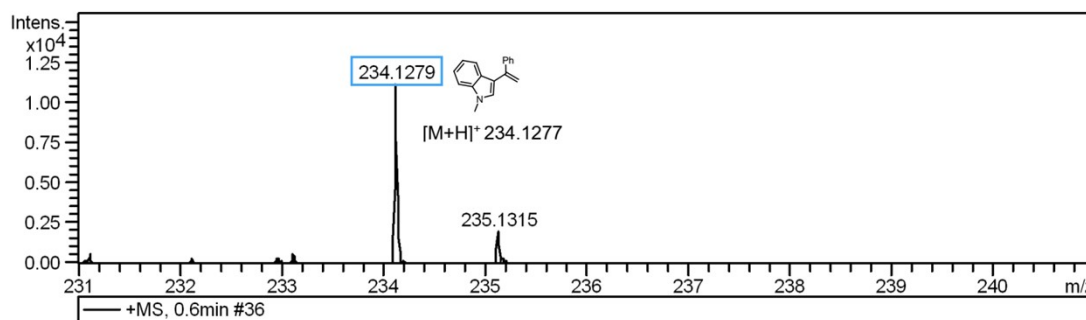

**Fig. S2** The products detected by HRMS in the reaction of **4a** and **7a**.

### 6.4 The key intermediates detected by HRMS for the synthesis of compounds **10a**

The reactions were conducted in a 15 mL of sealed tube equipped with oil bath and magnetic stirring. The mixture of **4** (0.36 mmol), **9a** (0.30 mmol) and TfOH (0.03 mmol, 10 mol%) in EtOH (1 mL) was stirred at 100 °C for 4 h. After the completion of the reaction, the mixture cooled to room temperature, and the resulting mixture was extracted with ethyl acetate, washed with water, and then concentrated by removing the solvent under vacuum. Then the mixture was detected by HRMS.

## Generic Display Report (all)

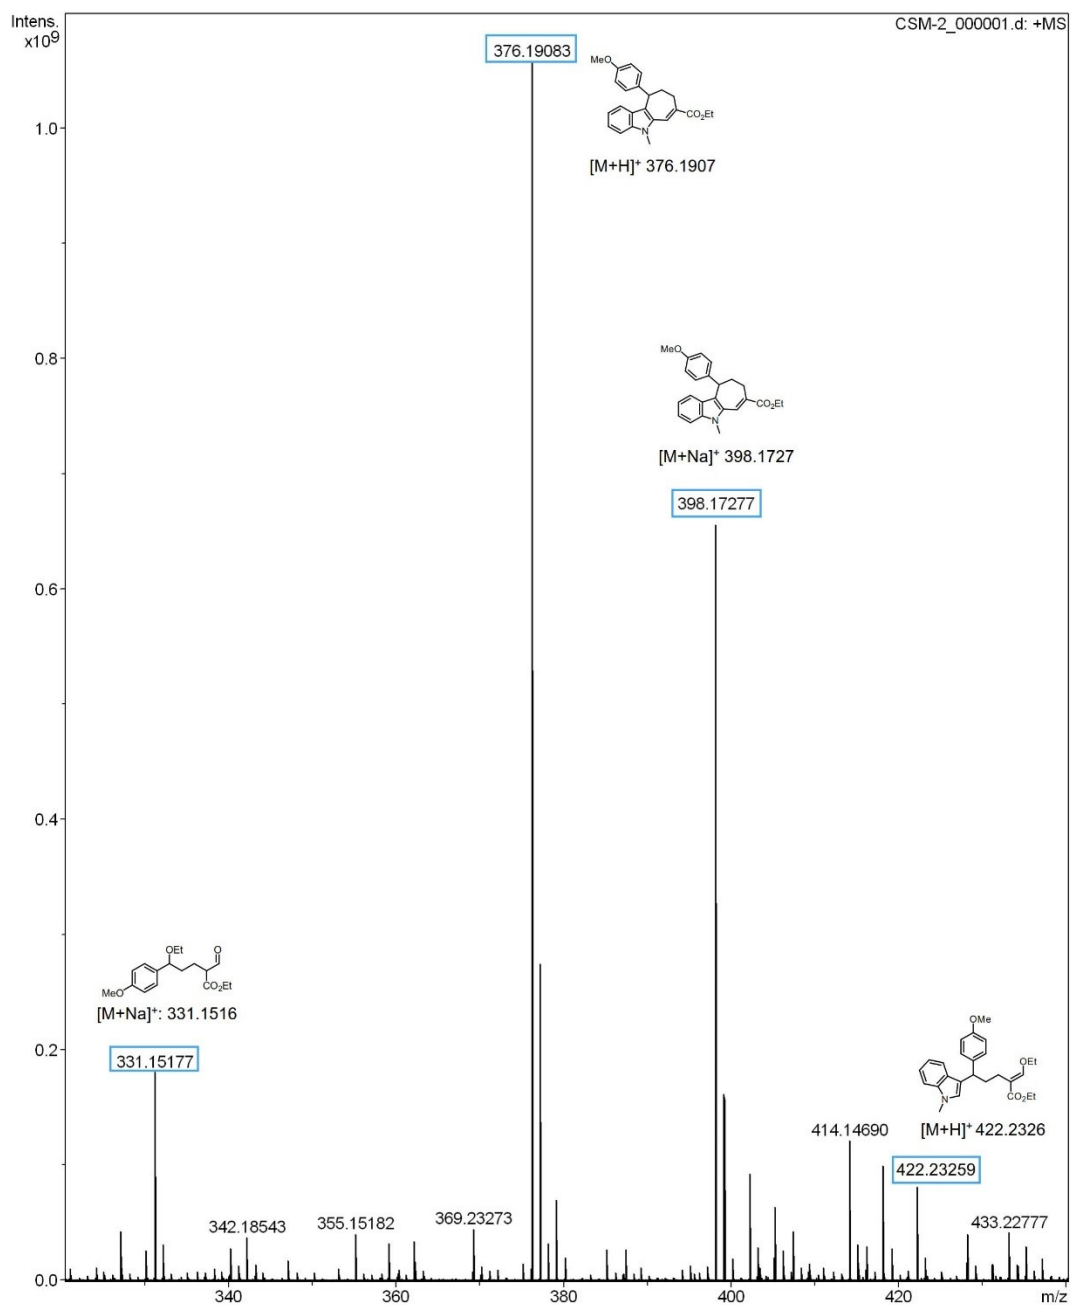

**Fig. S3** The key intermediates detected by HRMS for the synthesis of compounds **10a**.

### 6.5 Proposed mechanism for the formation of **10a**

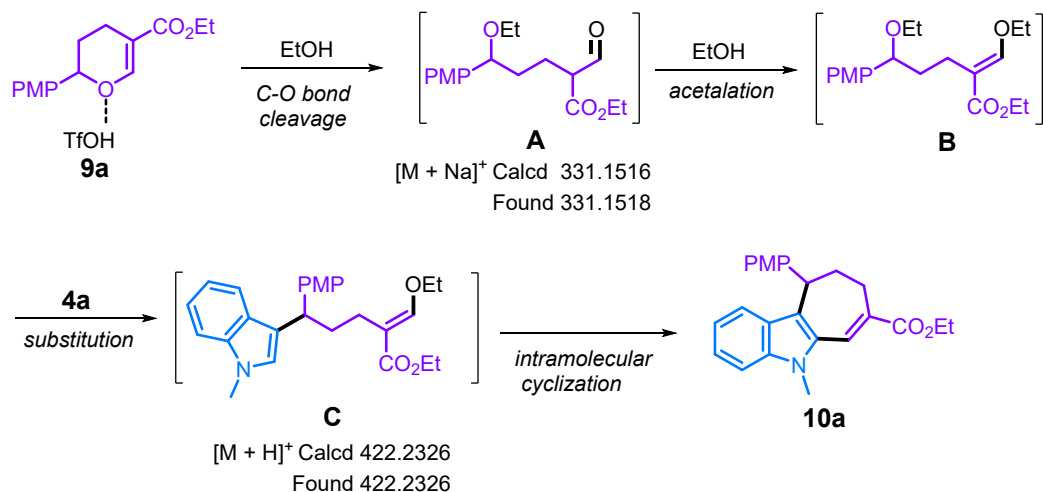

**Fig. S4** A possible mechanism for the formation of **10a**.

## 7. X-ray crystallographic analysis

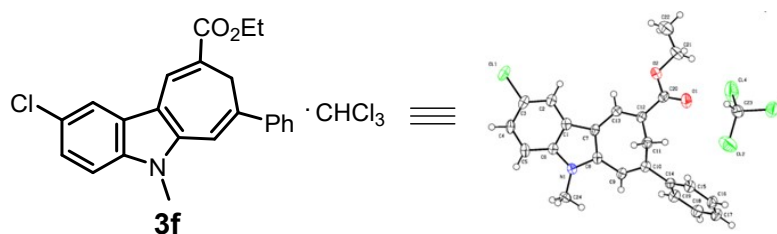

**Fig. S5** The X-ray diffraction structure of **3f**.

**Table S4** Crystal data and structure refinement for **3f**.

|                                    |                                                                 |
|------------------------------------|-----------------------------------------------------------------|
| Identification code                | exp_4129                                                        |
| Empirical formula                  | C <sub>24</sub> H <sub>21</sub> Cl <sub>4</sub> NO <sub>2</sub> |
| Formula weight                     | 497.22                                                          |
| Temperature/K                      | 169.99(10)                                                      |
| Crystal system                     | monoclinic                                                      |
| Space group                        | P2 <sub>1</sub> /c                                              |
| a/Å                                | 15.8280(9)                                                      |
| b/Å                                | 9.9575(4)                                                       |
| c/Å                                | 16.1714(9)                                                      |
| α/°                                | 90                                                              |
| β/°                                | 116.785(7)                                                      |
| γ/°                                | 90                                                              |
| Volume/Å <sup>3</sup>              | 2275.3(2)                                                       |
| Z                                  | 4                                                               |
| ρ <sub>calc</sub> /cm <sup>3</sup> | 1.452                                                           |
| μ/mm <sup>-1</sup>                 | 4.907                                                           |
| F(000)                             | 1024.0                                                          |
| Crystal size/mm <sup>3</sup>       | 0.15 × 0.12 × 0.1                                               |
| Radiation                          | Cu Kα (λ = 1.54184)                                             |

|                                                  |                                                                   |
|--------------------------------------------------|-------------------------------------------------------------------|
| 2 $\theta$ range for data collection/ $^{\circ}$ | 6.256 to 133.186                                                  |
| Index ranges                                     | $-18 \leq h \leq 15$ , $-7 \leq k \leq 11$ , $-18 \leq l \leq 19$ |
| Reflections collected                            | 7879                                                              |
| Independent reflections                          | 4011 [ $R_{\text{int}} = 0.0857$ , $R_{\text{sigma}} = 0.0975$ ]  |
| Data/restraints/parameters                       | 4011/0/282                                                        |
| Goodness-of-fit on $F^2$                         | 1.035                                                             |
| Final R indexes [ $I \geq 2\sigma(I)$ ]          | $R_1 = 0.0866$ , $wR_2 = 0.2314$                                  |
| Final R indexes [all data]                       | $R_1 = 0.1107$ , $wR_2 = 0.2709$                                  |
| Largest diff. peak/hole / $e \text{ \AA}^{-3}$   | 0.58/-0.69                                                        |

Single crystal of **3f** [ $\text{C}_{24}\text{H}_{21}\text{Cl}_4\text{NO}_2$ ] was obtained from chloroform by slow evaporation method at room temperature. CCDC 2193701 contains the supplementary crystallographic data which can be obtained free of charge from The Cambridge Crystallographic Data Center.

## 8. Evaluation of green metrics

$$E - factor = \frac{\text{Mass (waste)}}{\text{Mass (product)}}$$

$$\text{Solvent assessment} = 10 - \text{score of greenness}$$

$$\text{Catalyst cost} = \frac{\text{Cost of catalyst needed}}{\text{Mass (product)}}$$

Notes: **(a)** As our synthesized products are new, we chose some similar cyclohepta[*b*]indole compounds as the references.<sup>4</sup> **(b)** While calculating the E-factors,<sup>5</sup> it should be mentioned that we didn't consider the amounts of solvents used in post-processing and other materials consumption, such as drying agent and silica gel used for flash column chromatography as it is not reported in the cited synthesis references. Also, the recovery of organic solvents was out of consideration the consideration. Thus E-factor was roughly calculated to make a relative comparison. **(c)** The score of greenness of solvent was calculated according to the score in GSK's solvent sustainability guide.<sup>6</sup> The lower solvent assessment value indicate that the solvent is greener and recommended to be used. **(d)** The prices of catalysts refer to Sigma-Aldrich Co. LLC. **(e)** The preparation of self-made catalyst is complex so that the cost is considered extremely expensive.

**Table S5** Calculation of green metrics for the synthesis of cyclohepta[*b*]indoles.<sup>a</sup>

|          | Sun-2018 | Huang-2020 | Deng-2020 | Nishida-2018 | This work <sup>b</sup> |
|----------|----------|------------|-----------|--------------|------------------------|
| E-factor | 98.92    | 31.07      | 36.84     | 29.69        | 19.49                  |

|                                            |       |       |           |      |     |
|--------------------------------------------|-------|-------|-----------|------|-----|
| Solvent assessment                         | 9.5   | 2.5   | 5.5       | 5.5  | 1   |
| Catalyst cost<br>(CNY/per gram of product) | 717.5 | 226.6 | Self-made | 68.9 | 0.2 |
| Reaction time (h)                          | 12    | 16    | 22        | 5    | 5   |
| Steps to obtain substrates                 | 2     | 3     | 2         | 3    | 1   |

<sup>a</sup> Unless otherwise noted, only model products in references were calculated and assessed. <sup>b</sup> The synthesis of **3a** in a one-pot stepwise manner was assessed.

(1) G. Xu, L. Chen and J. Sun, *Org. Lett.*, 2018, **20**, 3408-3412.

| 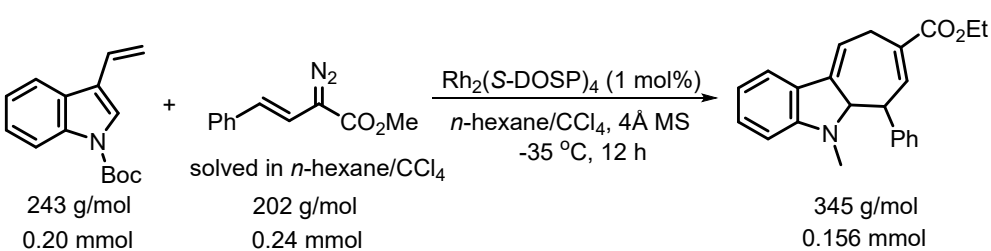 <div style="display: flex; justify-content: space-around; margin-top: 10px;"> <div> <p><b>tert-butyl 3-vinyl-1H-indole-1-carboxylate</b></p> <p>243 g/mol<br/>0.20 mmol</p> </div> <div> <p><b>methyl 2-diazo-4-phenylbut-3-enoate</b></p> <p>202 g/mol<br/>0.24 mmol</p> </div> <div> <p><b>Product</b></p> <p>345 g/mol<br/>0.156 mmol</p> </div> </div> |                                                      |
|-----------------------------------------------------------------------------------------------------------------------------------------------------------------------------------------------------------------------------------------------------------------------------------------------------------------------------------------------------------------------------------------------------------------------------------------------|------------------------------------------------------|
| Reagent                                                                                                                                                                                                                                                                                                                                                                                                                                       | Amount                                               |
| <i>tert</i> -butyl 3-vinyl-1H-indole-1-carboxylate                                                                                                                                                                                                                                                                                                                                                                                            | 243 g/mol x 0.20 mmol x 10 <sup>-3</sup> = 48.6 mg   |
| methyl 2-diazo-4-phenylbut-3-enoate                                                                                                                                                                                                                                                                                                                                                                                                           | 202 g/mol x 0.24 mmol x 10 <sup>-3</sup> = 48.48 mg  |
| Rh <sub>2</sub> (S-DOSP) <sub>4</sub>                                                                                                                                                                                                                                                                                                                                                                                                         | 1896 g/mol x 0.002 mmol x 10 <sup>-3</sup> = 3.79 mg |
| <i>n</i> -hexane                                                                                                                                                                                                                                                                                                                                                                                                                              | 0.659 g/mL x 4.8 mL = 3163.2 mg                      |
| CCl <sub>4</sub>                                                                                                                                                                                                                                                                                                                                                                                                                              | 1.595 g/mL x 1.2 mL = 1914 mg                        |
| 4Å MS                                                                                                                                                                                                                                                                                                                                                                                                                                         | 200 mg                                               |
| <b>Total</b>                                                                                                                                                                                                                                                                                                                                                                                                                                  | <b>5378.07 mg</b>                                    |
| product                                                                                                                                                                                                                                                                                                                                                                                                                                       | 345 g/mol x 0.156 mmol x 10 <sup>-3</sup> = 53.82 mg |

$$\text{E-factor} = (5378.07 - 53.82) \text{ mg} / 53.82 \text{ mg} = 98.92$$

$$\text{Catalyst cost} = (3.79 \times 10^{-3} \text{ g} \times 10188.5 \text{ CNY/g}) / (53.82 \times 10^{-3} \text{ g}) = 717.5 \text{ CNY/g}$$

(2) Y. Yuan, X. Guo, X. Zhang, B. Li and Q. Huang, *Org. Chem. Front.*, 2020, **7**, 3146-3159.

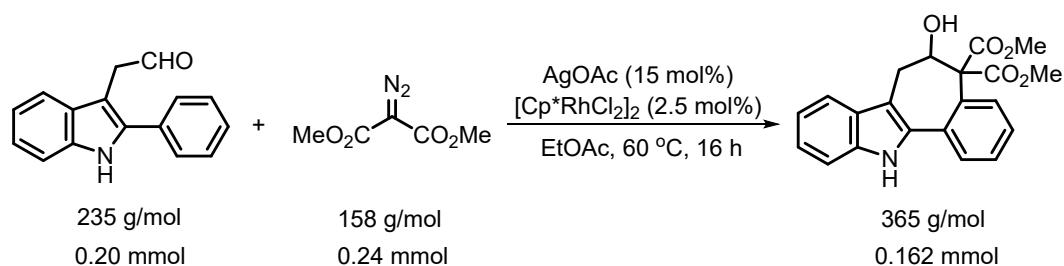

| Reagent                                         | Amount                                                                          |
|-------------------------------------------------|---------------------------------------------------------------------------------|
| 2-(2-phenyl-1 <i>H</i> -indol-3-yl)acetaldehyde | $235 \text{ g/mol} \times 0.20 \text{ mmol} \times 10^{-3} = 47 \text{ mg}$     |
| dimethyl 2-diazomalonate                        | $158 \text{ g/mol} \times 0.24 \text{ mmol} \times 10^{-3} = 37.92 \text{ mg}$  |
| $[\text{Cp}^*\text{RhCl}_2]_2$                  | $618 \text{ g/mol} \times 0.005 \text{ mmol} \times 10^{-3} = 3.09 \text{ mg}$  |
| AgOAc                                           | $166.9 \text{ g/mol} \times 0.03 \text{ mmol} \times 10^{-3} = 5 \text{ mg}$    |
| EtOAc                                           | $0.902 \text{ g/mL} \times 2 \text{ mL} = 1804 \text{ mg}$                      |
| <b>Total</b>                                    | <b>1897.01 mg</b>                                                               |
| product                                         | $365 \text{ g/mol} \times 0.162 \text{ mmol} \times 10^{-3} = 59.15 \text{ mg}$ |

$$\text{E-factor} = (1897.01 - 59.15) \text{ mg} / 59.15 \text{ mg} = 31.07$$

$$\text{Catalyst cost} = (3.09 \times 10^{-3} \text{ g} \times 4338 \text{ CNY/g}) / (59.15 \times 10^{-3} \text{ g}) = 226.6 \text{ CNY/g}$$

(3) W. L. Yang, W. Li, Z. T. Yang and W. P. Deng, *Org. Lett.*, 2020, **22**, 4026-4032.

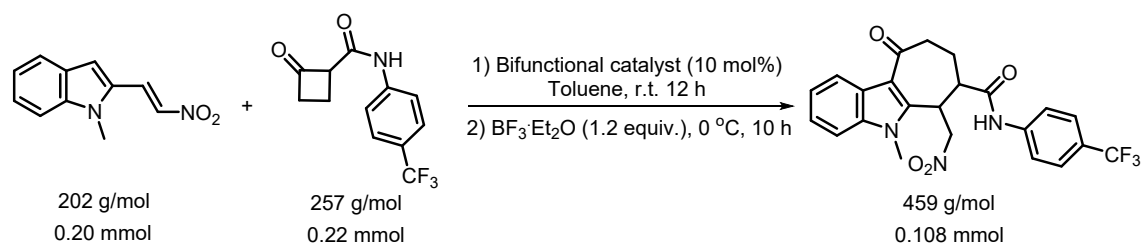

| Reagent                                      | Amount                                                                         |
|----------------------------------------------|--------------------------------------------------------------------------------|
| 1-methyl-2-(2-nitrovinyl)-1 <i>H</i> -indole | $202 \text{ g/mol} \times 0.20 \text{ mmol} \times 10^{-3} = 40.4 \text{ mg}$  |
| 2-amide-substituted cyclobutanone            | $257 \text{ g/mol} \times 0.22 \text{ mmol} \times 10^{-3} = 56.54 \text{ mg}$ |
| Bifunctional catalyst                        | 12.9 mg                                                                        |
| Toluene                                      | $0.866 \text{ g/mL} \times 2 \text{ mL} = 1732 \text{ mg}$                     |

|                                    |                                                      |
|------------------------------------|------------------------------------------------------|
| BF <sub>3</sub> ·Et <sub>2</sub> O | 141.9 g/mol x 0.24 mmol x 10 <sup>-3</sup> = 34 mg   |
| <b>Total</b>                       | <b>1875.84 mg</b>                                    |
| product                            | 459 g/mol x 0.108 mmol x 10 <sup>-3</sup> = 49.57 mg |

$$\text{E-factor} = (1875.84 - 49.57) \text{ mg} / 49.57 \text{ mg} = 36.84$$

The bifunctional catalyst used in the reaction is not commercially available.

(4) T. Takeda, S. Harada, A. Okabe and A. Nishida, *J. Org. Chem.*, 2018, **83**, 11541-11551

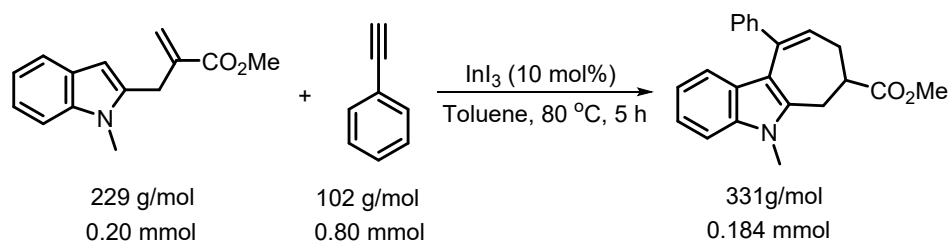

| Reagent                                           | Amount                                              |
|---------------------------------------------------|-----------------------------------------------------|
| methyl 2-((1-methyl-1H-indol-2-yl)methyl)acrylate | 229 g/mol x 0.20 mmol x 10 <sup>-3</sup> = 45.8 mg  |
| phenylacetylene                                   | 102 g/mol x 0.80 mmol x 10 <sup>-3</sup> = 81.6 mg  |
| InI <sub>3</sub>                                  | 495 g/mol x 0.02 mmol x 10 <sup>-3</sup> = 9.9 mg   |
| Toluene                                           | 0.866 g/mL x 2 mL = 1732 mg                         |
| <b>Total</b>                                      | <b>1869.3 mg</b>                                    |
| product                                           | 331 g/mol x 0.184 mmol x 10 <sup>-3</sup> = 60.9 mg |

$$\text{E-factor} = (1869.3 - 60.9) \text{ mg} / 60.9 \text{ mg} = 29.69$$

$$\text{Catalyst cost} = (9.9 \times 10^{-3} \text{ g} \times 424 \text{ CNY/g}) / (60.9 \times 10^{-3} \text{ g}) = 68.9 \text{ CNY/g}$$

(5) This work (one-pot stepwise manner)

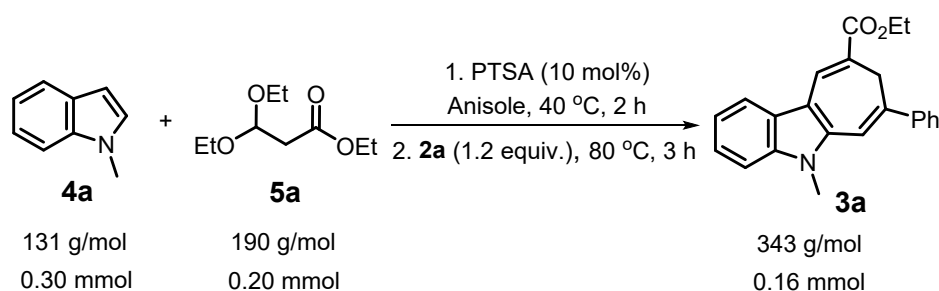

| Reagent      | Amount                                                                        |
|--------------|-------------------------------------------------------------------------------|
| <b>4a</b>    | $131 \text{ g/mol} \times 0.30 \text{ mmol} \times 10^{-3} = 39.3 \text{ mg}$ |
| <b>5a</b>    | $190 \text{ g/mol} \times 0.20 \text{ mmol} \times 10^{-3} = 38 \text{ mg}$   |
| PTSA         | $172 \text{ g/mol} \times 0.02 \text{ mmol} \times 10^{-3} = 3.44 \text{ mg}$ |
| Anisole      | $0.995 \text{ g/mL} \times 1 \text{ mL} = 995 \text{ mg}$                     |
| <b>2a</b>    | $206 \text{ g/mol} \times 0.24 \text{ mmol} \times 10^{-3} = 49.4 \text{ mg}$ |
| <b>Total</b> | <b>1125.14 mg</b>                                                             |
| product      | $343 \text{ g/mol} \times 0.16 \text{ mmol} \times 10^{-3} = 54.9 \text{ mg}$ |

$$\text{E-factor} = (1125.14 - 54.9) \text{ mg} / 54.9 \text{ mg} = 19.49$$

$$\text{Catalyst cost} = (3.44 \times 10^{-3} \text{ g} \times 3.2 \text{ CNY/g}) / (54.9 \times 10^{-3} \text{ g}) = 0.2 \text{ CNY/g}$$

## 9. Characterization data of products

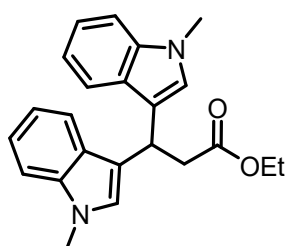

Ethyl 3,3-bis(1-methyl-1*H*-indol-3-yl)propanoate (**1a**): yellow oil (49 mg, 90% yield);  $^1\text{H}$  NMR (400 MHz,  $\text{CDCl}_3$ , TMS, 25  $^\circ\text{C}$ )  $\delta$  = 7.60 (d,  $J$  = 7.9 Hz, 2H), 7.25 (d,  $J$  = 8.0 Hz, 2H), 7.19 (q,  $J$  = 7.9, 6.5 Hz, 2H), 7.03 (t,  $J$  = 7.5 Hz, 2H), 6.85 (s, 2H), 5.10 (t,  $J$  = 7.7 Hz, 1H), 4.02 (q,  $J$  = 7.1 Hz, 2H), 3.67 (s, 6H), 3.15 (d,  $J$  = 7.7 Hz, 2H), 1.09 ppm (t,  $J$  = 7.1 Hz, 3H);  $^{13}\text{C}$  NMR (100 MHz,  $\text{CDCl}_3$ , 25  $^\circ\text{C}$ )  $\delta$  = 172.6, 137.3, 127.1, 126.5, 121.5, 119.7, 118.7, 117.4, 109.2, 60.3, 41.6, 32.7, 30.7, 14.1 ppm. IR (KBr)  $\nu$  = 3052, 2933, 1730, 1614, 1472, 1371, 1328, 1152, 740, 428  $\text{cm}^{-1}$ ; HRMS (ESI, TOF)  $m/z$ : calcd for  $\text{C}_{23}\text{H}_{24}\text{N}_2\text{NaO}_2$ ,  $[\text{M} + \text{Na}]^+$  383.1730, found 383.1725.

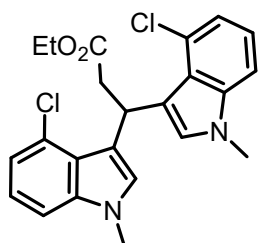

Ethyl 3,3-bis(4-chloro-1-methyl-1*H*-indol-3-yl)propanoate (**1b**): yellow oil (56 mg, 88% yield);  $^1\text{H}$  NMR (400 MHz,  $\text{CDCl}_3$ , TMS, 25  $^\circ\text{C}$ )  $\delta$  = 7.07 (td,  $J$  = 7.9, 4.8 Hz, 2H), 7.00 (d,  $J$  = 8.2 Hz, 2H), 6.85 (s, 2H), 6.71 (dd,  $J$  = 11.3, 7.6 Hz, 2H), 5.35 (t,  $J$  = 7.9 Hz, 1H), 4.01 (q,  $J$  = 7.1 Hz, 2H), 3.66 (s, 6H), 3.20 (d,  $J$  = 7.8 Hz, 2H), 1.06 ppm (t,  $J$  = 7.1 Hz, 3H);  $^{13}\text{C}$  NMR (100 MHz,  $\text{CDCl}_3$ , 25  $^\circ\text{C}$ )  $\delta$  = 172.5, 158.2, 155.7, 140.1, 140.0, 126.9, 126.9, 121.9, 121.8, 116.7, 116.7, 115.7, 115.5, 105.3, 105.3, 104.4, 104.2, 60.1, 42.0, 33.0, 32.0, 14.1 ppm. IR (KBr)  $\nu$



= 3067, 2936, 1731, 1628, 1498, 1372, 1235, 777, 737  $\text{cm}^{-1}$ ; HRMS (ESI, TOF)  $m/z$ : calcd for  $\text{C}_{23}\text{H}_{22}\text{Cl}_2\text{N}_2\text{NaO}_2$ ,  $[\text{M} + \text{Na}]^+$  451.0951, found 451.0950.

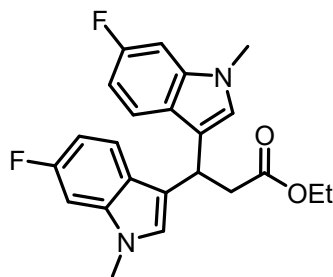

Ethyl 3,3-bis(6-fluoro-1-methyl-1H-indol-3-yl)propanoate (**1c**): yellow oil (53 mg, 89% yield);  $^1\text{H}$  NMR (400 MHz,  $\text{CDCl}_3$ , TMS, 25  $^\circ\text{C}$ )  $\delta$  = 7.44 (dd,  $J$  = 8.7, 5.3 Hz, 2H), 6.92 (dd,  $J$  = 9.9, 2.3 Hz, 2H), 6.83 (s, 2H), 6.78 (td,  $J$  = 9.2, 2.3 Hz, 2H), 5.01 (t,  $J$  = 7.7 Hz, 1H), 4.03 (q,  $J$  = 7.1 Hz, 2H), 3.65 (s, 6H), 3.10 (d,  $J$  = 7.7 Hz, 2H),

1.10 ppm (t,  $J$  = 7.1 Hz, 3H);  $^{13}\text{C}$  NMR (100 MHz,  $\text{CDCl}_3$ , 25  $^\circ\text{C}$ )  $\delta$  = 172.29, 161.1 (d,  $^1J_{\text{C-F}}$  = 236.0 Hz), 137.4 (d,  $^3J_{\text{C-F}}$  = 11.0 Hz), 126.6 (d,  $^4J_{\text{C-F}}$  = 4.0 Hz), 123.5, 120.3 (d,  $^3J_{\text{C-F}}$  = 10.0 Hz), 117.5, 107.6 (d,  $^2J_{\text{C-F}}$  = 24.0 Hz), 95.7 (d,  $^2J_{\text{C-F}}$  = 26.0 Hz), 60.4, 41.5, 32.8, 30.6, 14.1 ppm;  $^{19}\text{F}$  NMR (377 MHz,  $\text{CDCl}_3$ , 25  $^\circ\text{C}$ )  $\delta$  = -121.1 ppm (m, 1F). IR (KBr)  $\nu$  = 3069, 2935, 1730, 1623, 1478, 1373, 1334, 1106, 801, 733  $\text{cm}^{-1}$ ; HRMS (ESI, TOF)  $m/z$ : calcd for  $\text{C}_{23}\text{H}_{22}\text{F}_2\text{N}_2\text{NaO}_2$ ,  $[\text{M} + \text{Na}]^+$  419.1542, found 419.1545.

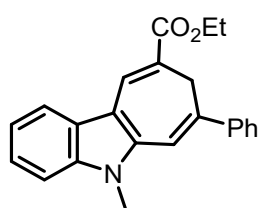

Ethyl 5-methyl-7-phenyl-5,8-dihydrocyclohepta[b]indole-9-carboxylate (**3a**): yellow solid (55 mg, 80% yield), mp: 92–94  $^\circ\text{C}$ ;  $^1\text{H}$  NMR (400 MHz,  $\text{CDCl}_3$ , TMS, 25  $^\circ\text{C}$ )  $\delta$  = 8.23 (s, 1H), 7.90–7.82 (m, 3H), 7.45–7.36 (m, 4H), 7.32 (t,  $J$  = 7.3 Hz, 1H), 7.24 (d,  $J$  = 8.1 Hz, 1H), 7.05 (s, 1H), 4.30

(q,  $J$  = 7.1 Hz, 2H), 3.85 (s, 3H), 3.34 (s, 2H), 1.36 ppm (t,  $J$  = 7.1 Hz, 3H);  $^{13}\text{C}$  NMR (100 MHz,  $\text{CDCl}_3$ , 25  $^\circ\text{C}$ )  $\delta$  = 166.5, 141.2, 140.4, 137.6, 136.2, 130.3, 128.6, 127.9, 127.1, 126.7, 123.8, 120.6, 119.1, 115.7, 115.4, 113.5, 109.3, 60.6, 30.1, 30.0, 14.5 ppm. IR (KBr)  $\nu$  = 3056, 2979, 1690, 1604, 1495, 1370, 1260, 1194, 1088, 743, 428  $\text{cm}^{-1}$ ; HRMS (ESI, TOF)  $m/z$ : calcd for  $\text{C}_{23}\text{H}_{21}\text{NNaO}_2$ ,  $[\text{M} + \text{Na}]^+$  366.1465, found 366.1462.

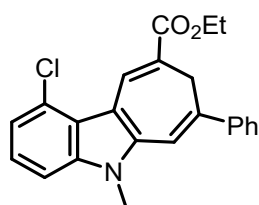

Ethyl 1-chloro-5-methyl-7-phenyl-5,8-dihydrocyclohepta[b]indole-9-carboxylate (**3b**): yellow solid (55 mg, 73% yield), mp: 142–144  $^\circ\text{C}$ ;  $^1\text{H}$  NMR (400 MHz,  $\text{CDCl}_3$ , TMS, 25  $^\circ\text{C}$ )  $\delta$  = 8.27 (s, 1H), 7.78 (d,  $J$  = 7.5 Hz, 2H), 7.34 (t,  $J$  = 7.6 Hz, 2H), 7.24 (d,  $J$  = 7.4 Hz, 1H), 7.17 (q,  $J$  = 3.5,

3.0 Hz, 1H), 7.06 (d,  $J$  = 8.2 Hz, 1H), 6.95–6.92 (m, 1H), 6.82 (dd,  $J$  = 10.5, 7.9 Hz, 1H), 4.21 (q,  $J$  = 7.1 Hz, 2H), 3.75 (s, 3H), 3.24 (s, 2H), 1.27 ppm (t,  $J$  = 7.1 Hz, 3H);  $^{13}\text{C}$  NMR (100 MHz,  $\text{CDCl}_3$ , 25  $^\circ\text{C}$ )  $\delta$  = 166.4, 141.1, 140.2, 137.1, 131.9, 131.8, 128.7, 128.1, 127.1, 124.2, 124.1, 116.2, 113.0, 106.2, 106.0, 105.31, 105.27, 60.6, 30.5, 29.8, 14.4 ppm. IR (KBr)  $\nu$  = 3060, 2979, 1690, 1611,

1495, 1314, 1242, 1092, 731, 426  $\text{cm}^{-1}$ ; HRMS (ESI, TOF)  $m/z$ : calcd for  $\text{C}_{23}\text{H}_{21}\text{ClNO}_2$ ,  $[\text{M} + \text{H}]^+$  378.1255, found 378.1251 ( $^{35}\text{Cl}$ ) and 380.1227 ( $^{37}\text{Cl}$ ).

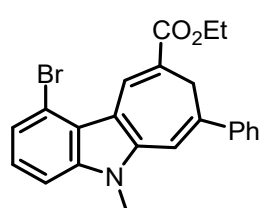

Ethyl 1-bromo-5-methyl-7-phenyl-5,8-dihydrocyclohepta[b]indole-9-carboxylate (**3c**): yellow solid (59 mg, 71% yield), mp: 133–135 °C;  $^1\text{H}$  NMR (400 MHz,  $\text{CDCl}_3$ , TMS, 25 °C)  $\delta$  = 8.89 (s, 1H), 7.87 (d,  $J$  = 7.5 Hz, 2H), 7.45–7.39 (m, 3H), 7.34 (dd,  $J$  = 7.8, 5.7 Hz, 2H), 7.18 (t,  $J$  = 7.9

Hz, 1H), 7.02 (s, 1H), 4.28 (q,  $J$  = 7.1 Hz, 2H), 3.85 (s, 3H), 3.27 (s, 2H), 1.34 ppm (t,  $J$  = 7.1 Hz, 3H);  $^{13}\text{C}$  NMR (100 MHz,  $\text{CDCl}_3$ , 25 °C)  $\delta$  = 166.4, 141.8, 140.0, 138.8, 138.7, 131.4, 128.7, 128.2, 127.2, 125.0, 124.8, 124.2, 115.8, 115.6, 115.1, 112.8, 108.4, 60.6, 30.3, 29.6, 14.4 ppm. IR (KBr)  $\nu$  = 3057, 2930, 1690, 1599, 1453, 1311, 1244, 1192, 1091, 733, 426  $\text{cm}^{-1}$ ; HRMS (ESI, TOF)  $m/z$ : calcd for  $\text{C}_{23}\text{H}_{21}\text{BrNO}_2$ ,  $[\text{M} + \text{H}]^+$  422.0750, found 422.0750 ( $^{79}\text{Br}$ ) and 424.0733 ( $^{81}\text{Br}$ ).

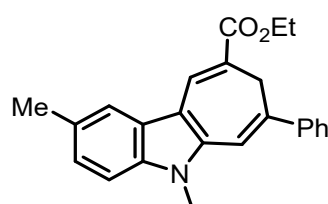

Ethyl 2,5-dimethyl-7-phenyl-5,8-dihydrocyclohepta[b]indole-9-carboxylate (**3d**): yellow solid (48 mg, 68% yield), mp: 92–94 °C;  $^1\text{H}$  NMR (400 MHz,  $\text{CDCl}_3$ , TMS, 25 °C)  $\delta$  = 8.20 (s, 1H), 7.87 (d,  $J$  = 7.5 Hz, 2H), 7.65 (s, 1H), 7.42 (t,  $J$  = 7.6 Hz, 2H), 7.32 (d,  $J$  =

7.3 Hz, 1H), 7.29 (d,  $J$  = 6.5 Hz, 1H), 7.19 (d,  $J$  = 8.1 Hz, 1H), 7.04 (s, 1H), 4.30 (q,  $J$  = 7.1 Hz, 2H), 3.83 (s, 3H), 3.33 (s, 2H), 2.52 (s, 3H), 1.36 ppm (t,  $J$  = 7.1 Hz, 3H);  $^{13}\text{C}$  NMR (100 MHz,  $\text{CDCl}_3$ , 25 °C)  $\delta$  = 166.6, 141.2, 140.5, 136.0, 135.9, 130.4, 130.1, 128.6, 127.8, 127.1, 126.8, 125.3, 118.8, 115.3, 115.0, 113.6, 108.9, 60.6, 30.1, 30.0, 21.5, 14.5 ppm. IR (KBr)  $\nu$  = 3029, 2930, 1689, 1607, 1494, 1369, 1263, 1194, 1087, 745, 432  $\text{cm}^{-1}$ ; HRMS (ESI, TOF)  $m/z$ : calcd for  $\text{C}_{24}\text{H}_{24}\text{NO}_2$ ,  $[\text{M} + \text{H}]^+$  358.1802, found 358.1803.

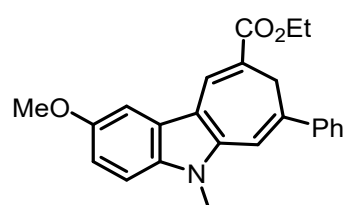

Ethyl 2-methoxy-5-methyl-7-phenyl-5,8-dihydrocyclohepta[b]indole-9-carboxylate (**3e**): yellow solid (47 mg, 64% yield), mp: 83–85 °C;  $^1\text{H}$  NMR (400 MHz,  $\text{CDCl}_3$ , TMS, 25 °C)  $\delta$  = 8.18 (s, 1H), 7.86 (d,  $J$  = 7.7 Hz, 2H), 7.42 (t,  $J$  = 7.6

Hz, 2H), 7.33 (d,  $J$  = 7.2 Hz, 1H), 7.28 (d,  $J$  = 8.7 Hz, 2H), 7.02 (d,  $J$  = 9.4 Hz, 2H), 4.31 (q,  $J$  = 7.1 Hz, 2H), 3.93 (s, 3H), 3.83 (s, 3H), 3.34 (s, 2H), 1.37 ppm (t,  $J$  = 7.1 Hz, 3H);  $^{13}\text{C}$  NMR (100 MHz,  $\text{CDCl}_3$ , 25 °C)  $\delta$  = 166.6, 155.0, 141.5, 140.5, 136.1, 132.7, 130.4, 129.7, 128.6, 127.9, 127.1, 115.3, 115.0, 114.0, 113.6, 110.1, 100.8, 60.6, 56.0, 30.2, 30.0, 14.5 ppm. IR (KBr)  $\nu$  = 3059, 2929, 1689, 1619, 1489, 1269, 1234, 1089, 697, 426  $\text{cm}^{-1}$ ; HRMS (ESI, TOF)  $m/z$ : calcd for  $\text{C}_{24}\text{H}_{24}\text{NO}_3$ ,  $[\text{M} +$

H]<sup>+</sup> 374.1751, found 374.1748.

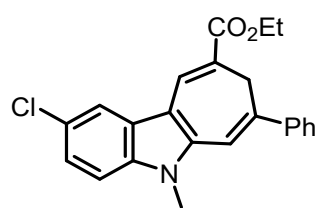

Ethyl 2-chloro-5-methyl-7-phenyl-5,8-dihydrocyclohepta[b]indole-9-carboxylate (**3f**): yellow solid (58 mg, 77% yield), mp: 182–184 °C; <sup>1</sup>H NMR (400 MHz, CDCl<sub>3</sub>, TMS, 25 °C)  $\delta$  = 8.12 (s, 1H), 7.85 (d,  $J$  = 7.4 Hz, 2H), 7.79 (s, 1H), 7.42 (t,  $J$  = 7.5 Hz, 2H), 7.34 (d,  $J$  = 7.2 Hz, 1H), 7.31–7.27 (m, 2H), 7.00 (s, 1H), 4.29 (q,  $J$  = 7.2 Hz, 2H), 3.81 (s, 3H), 3.33 (s, 2H), 1.36 ppm (t,  $J$  = 7.1 Hz, 3H); <sup>13</sup>C NMR (100 MHz, CDCl<sub>3</sub>, 25 °C)  $\delta$  = 166.3, 142.0, 140.3, 137.2, 135.9, 129.7, 128.7, 128.1, 127.6, 127.1, 126.3, 123.9, 118.6, 116.4, 114.7, 113.3, 110.3, 60.7, 30.2, 30.0, 14.5 ppm. IR (KBr)  $\nu$  = 3059, 2980, 1690, 1620, 1472, 1286, 1247, 1194, 1090, 734, 444 cm<sup>-1</sup>; HRMS (ESI, TOF)  $m/z$ : calcd for C<sub>23</sub>H<sub>21</sub>ClNO<sub>2</sub>, [M + H]<sup>+</sup> 378.1255, found 378.1255 (<sup>35</sup>Cl) and 380.1228 (<sup>37</sup>Cl).

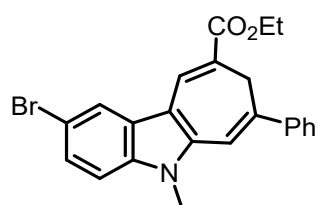

Ethyl 2-bromo-5-methyl-7-phenyl-5,8-dihydrocyclohepta[b]indole-9-carboxylate (**3g**): yellow solid (61 mg, 73% yield), mp: 198–200 °C; <sup>1</sup>H NMR (400 MHz, CDCl<sub>3</sub>, TMS, 25 °C)  $\delta$  = 8.11 (s, 1H), 7.95 (d,  $J$  = 1.9 Hz, 1H), 7.85 (d,  $J$  = 7.6 Hz, 2H), 7.45–7.39 (m, 3H), 7.33 (t,  $J$  = 7.3 Hz, 1H), 7.23 (d,  $J$  = 8.7 Hz, 1H), 7.00 (s, 1H), 4.29 (q,  $J$  = 7.1 Hz, 2H), 3.81 (s, 3H), 3.33 (s, 2H), 1.36 ppm (t,  $J$  = 7.1 Hz, 3H); <sup>13</sup>C NMR (100 MHz, CDCl<sub>3</sub>, 25 °C)  $\delta$  = 166.3, 141.9, 140.2, 137.2, 136.2, 129.7, 128.7, 128.2, 128.1, 127.1, 126.5, 121.7, 116.5, 114.6, 113.8, 113.2, 110.7, 60.7, 30.2, 30.0, 14.4 ppm. IR (KBr)  $\nu$  = 3058, 2979, 1690, 1619, 1470, 1286, 1248, 1194, 1089, 731, 429 cm<sup>-1</sup>; HRMS (ESI, TOF)  $m/z$ : calcd for C<sub>23</sub>H<sub>21</sub>BrNO<sub>2</sub>, [M + H]<sup>+</sup> 422.0750, found 422.0754 (<sup>79</sup>Br) and 424.0733 (<sup>81</sup>Br).

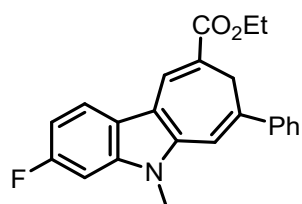

Ethyl 3-fluoro-5-methyl-7-phenyl-5,8-dihydrocyclohepta[b]indole-9-carboxylate (**3h**): yellow solid (54 mg, 75% yield), mp: 88–90 °C; <sup>1</sup>H NMR (400 MHz, CDCl<sub>3</sub>, TMS, 25 °C)  $\delta$  = 8.15 (s, 1H), 7.86 (d,  $J$  = 7.5 Hz, 2H), 7.75 (dd,  $J$  = 8.6, 5.3 Hz, 1H), 7.42 (t,  $J$  = 7.6 Hz, 2H), 7.33 (t,  $J$  = 7.3 Hz, 1H), 7.07–6.96 (m, 3H), 4.29 (q,  $J$  = 7.1 Hz, 2H), 3.80 (s, 3H), 3.32 (s, 2H), 1.35 ppm (t,  $J$  = 7.1 Hz, 3H); <sup>13</sup>C NMR (100 MHz, CDCl<sub>3</sub>, 25 °C)  $\delta$  = 166.4, 162.2 (d, <sup>1</sup> $J_{C-F}$  = 239.0 Hz), 141.7 (d, <sup>4</sup> $J_{C-F}$  = 3.0 Hz), 140.3, 138.0 (d, <sup>3</sup> $J_{C-F}$  = 11.0 Hz), 135.7, 129.8, 128.6, 128.0, 127.1, 123.1, 120.1 (d, <sup>3</sup> $J_{C-F}$  = 10.0 Hz), 116.0, 115.4, 113.3, 109.2 (d, <sup>2</sup> $J_{C-F}$  = 24.0 Hz), 96.1 (d, <sup>2</sup> $J_{C-F}$  = 26.0 Hz), 60.7, 30.3, 30.0, 14.4 ppm; <sup>19</sup>F NMR (377 MHz, CDCl<sub>3</sub>, 25 °C)  $\delta$  = -117.6 (m, 1F) ppm. IR (KBr)

$\nu = 3059, 2930, 1690, 1608, 1494, 1370, 1254, 1195, 1089, 751, 428 \text{ cm}^{-1}$ ; HRMS (ESI, TOF)  $m/z$ : calcd for  $\text{C}_{23}\text{H}_{21}\text{FNO}_2$ ,  $[\text{M} + \text{H}]^+$  362.1551, found 362.1552.

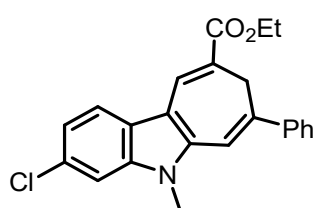

Ethyl 3-chloro-5-methyl-7-phenyl-5,8-dihydrocyclohepta[*b*]indole-9-carboxylate (**3i**): yellow solid (52 mg, 70% yield), mp: 93–95 °C;  $^1\text{H}$  NMR (400 MHz,  $\text{CDCl}_3$ , TMS, 25 °C)  $\delta = 8.14$  (s, 1H), 7.85 (d,  $J = 7.5$  Hz, 2H), 7.74 (d,  $J = 8.4$  Hz, 1H), 7.42 (t,  $J = 7.6$  Hz, 2H), 7.37–7.31 (m, 2H), 7.20 (dd,  $J = 8.4, 1.8$  Hz, 1H), 7.02 (s, 1H), 4.29 (q,  $J = 7.2$  Hz, 2H), 3.81 (s, 3H), 3.33 (s, 2H), 1.35 ppm (t,  $J = 7.2$  Hz, 3H);  $^{13}\text{C}$  NMR (100 MHz,  $\text{CDCl}_3$ , 25 °C)  $\delta = 166.4, 141.7, 140.2, 138.1, 136.6, 129.8, 129.7, 128.7, 128.1, 127.1, 125.2, 121.2, 120.0, 116.4, 115.3, 113.2, 109.4, 60.7, 30.2, 30.0, 14.4$  ppm. IR (KBr)  $\nu = 3060, 2980, 1691, 1602, 1496, 1256, 1195, 1090, 696, 439 \text{ cm}^{-1}$ ; HRMS (ESI, TOF)  $m/z$ : calcd for  $\text{C}_{23}\text{H}_{21}\text{ClNO}_2$ ,  $[\text{M} + \text{H}]^+$  378.1255, found 378.1252 ( $^{35}\text{Cl}$ ) and 380.1228 ( $^{37}\text{Cl}$ ).

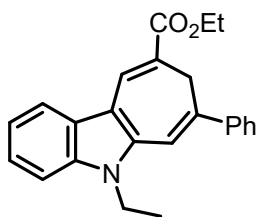

Ethyl 5-ethyl-7-phenyl-5,8-dihydrocyclohepta[*b*]indole-9-carboxylate (**3j**): yellow solid (55 mg, 78% yield), mp: 89–91 °C;  $^1\text{H}$  NMR (400 MHz,  $\text{CDCl}_3$ , TMS, 25 °C)  $\delta = 8.23$  (s, 1H), 7.86 (d,  $J = 7.7$  Hz, 3H), 7.45–7.36 (m, 4H), 7.33 (d,  $J = 6.9$  Hz, 1H), 7.24 (d,  $J = 7.0$  Hz, 1H), 7.05 (s, 1H), 4.32 (dq,  $J = 18.4, 7.2$  Hz, 4H), 3.35 (s, 2H), 1.46 (t,  $J = 7.2$  Hz, 3H), 1.36 ppm (t,  $J = 7.1$  Hz, 3H);  $^{13}\text{C}$  NMR (100 MHz,  $\text{CDCl}_3$ , 25 °C)  $\delta = 166.6, 140.5, 140.2, 136.5, 136.3, 130.4, 128.6, 127.9, 127.1, 126.9, 123.7, 120.5, 119.2, 115.7, 115.5, 113.3, 109.3, 60.6, 38.4, 30.1, 14.7, 14.5$  ppm. IR (KBr)  $\nu = 3055, 2978, 1690, 1619, 1495, 1369, 1249, 1193, 1083, 742, 429 \text{ cm}^{-1}$ ; HRMS (ESI, TOF)  $m/z$ : calcd for  $\text{C}_{24}\text{H}_{24}\text{NO}_2$ ,  $[\text{M} + \text{H}]^+$  358.1802, found 358.1799.

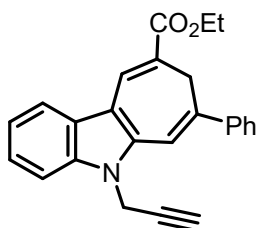

Ethyl 7-phenyl-5-(prop-2-yn-1-yl)-5,8-dihydrocyclohepta[*b*]indole-9-carboxylate (**3k**): yellow solid (64 mg, 88% yield), mp: 114–116 °C;  $^1\text{H}$  NMR (400 MHz,  $\text{CDCl}_3$ , TMS, 25 °C)  $\delta = 8.21$  (s, 1H), 7.87 (t,  $J = 8.2$  Hz, 3H), 7.48–7.39 (m, 4H), 7.34 (d,  $J = 7.3$  Hz, 1H), 7.27 (t,  $J = 7.5$  Hz, 1H), 7.16 (s, 1H), 4.99 (d,  $J = 2.5$  Hz, 2H), 4.30 (q,  $J = 7.1$  Hz, 2H), 3.35 (s, 2H), 2.34 (s, 1H), 1.36 ppm (t,  $J = 7.1$  Hz, 3H);  $^{13}\text{C}$  NMR (100 MHz,  $\text{CDCl}_3$ , 25 °C)  $\delta = 166.4, 140.4, 140.2, 136.6, 136.5, 130.1, 128.7, 128.0, 127.2, 127.0, 124.2, 121.1, 119.3, 116.5, 116.2, 113.0, 109.4, 73.1, 60.7, 33.1, 30.1, 14.5$  ppm. IR (KBr)  $\nu = 3290, 3057, 2980, 2210, 1690, 1618, 1465, 1246, 1191, 1092, 743, 431 \text{ cm}^{-1}$ ; HRMS (ESI, TOF)  $m/z$ : calcd for  $\text{C}_{25}\text{H}_{22}\text{NO}_2$ ,  $[\text{M} + \text{H}]^+$  368.1645, found 368.1647.

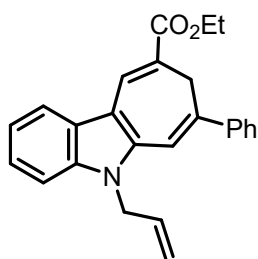

Ethyl 5-allyl-7-phenyl-5,8-dihydrocyclohepta[*b*]indole-9-carboxylate

(**3l**): yellow solid (60 mg, 82% yield), mp: 117–119 °C; <sup>1</sup>H NMR (400 MHz, CDCl<sub>3</sub>, TMS, 25 °C)  $\delta$  = 8.24 (s, 1H), 7.85 (dd, *J* = 11.2, 7.8 Hz, 3H), 7.41 (t, *J* = 7.6 Hz, 2H), 7.37–7.31 (m, 3H), 7.28–7.25 (m, 1H), 7.02 (s, 1H), 6.02 (ddt, *J* = 17.0, 9.8, 4.6 Hz, 1H), 5.20 (d, *J* = 10.4 Hz, 1H),

4.96 (d, *J* = 17.0 Hz, 1H), 4.91–4.87 (m, 2H), 4.30 (q, *J* = 7.1 Hz, 2H), 3.34 (s, 2H), 1.36 ppm (t, *J* = 7.1 Hz, 3H); <sup>13</sup>C NMR (100 MHz, CDCl<sub>3</sub>, 25 °C)  $\delta$  = 166.5, 140.9, 140.4, 137.0, 136.3, 132.2, 130.3, 128.6, 127.9, 127.1, 126.8, 123.9, 120.7, 119.2, 117.0, 116.0, 115.7, 113.4, 109.6, 60.6, 45.9, 30.1, 14.5 ppm. IR (KBr)  $\nu$  = 3057, 2981, 1691, 1618, 1465, 1244, 1190, 1091, 742, 431 cm<sup>-1</sup>; HRMS (ESI, TOF) *m/z*: calcd for C<sub>25</sub>H<sub>24</sub>NO<sub>2</sub>, [M + H]<sup>+</sup> 370.1802, found 370.1802.

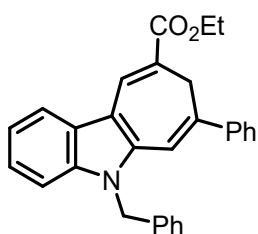

Ethyl 5-benzyl-7-phenyl-5,8-dihydrocyclohepta[*b*]indole-9-carboxylate

(**3m**): yellow solid (70 mg, 84% yield), mp: 103–105 °C; <sup>1</sup>H NMR (400 MHz, CDCl<sub>3</sub>, TMS, 25 °C)  $\delta$  = 8.26 (s, 1H), 7.89 (d, *J* = 7.7 Hz, 1H), 7.76 (d, *J* = 7.7 Hz, 2H), 7.37 (t, *J* = 7.6 Hz, 2H), 7.32–7.24 (m, 7H), 7.09 (d, *J* = 7.2 Hz, 2H), 7.00 (s, 1H), 5.50 (s, 2H), 4.30 (q, *J* = 7.1 Hz, 2H), 3.35 (s, 2H), 1.36 ppm (t, *J* = 7.1

Hz, 3H); <sup>13</sup>C NMR (100 MHz, CDCl<sub>3</sub>, 25 °C)  $\delta$  = 166.5, 141.1, 140.3, 137.3, 136.7, 136.6, 130.3, 129.0, 128.6, 127.9, 127.7, 127.1, 126.9, 126.2, 124.1, 120.9, 119.2, 116.1, 115.9, 113.5, 109.8, 60.7, 47.2, 30.1, 14.5 ppm. IR (KBr)  $\nu$  = 3058, 2980, 1690, 1618, 1496, 1463, 1243, 1188, 1091, 739, 452 cm<sup>-1</sup>; HRMS (ESI, TOF) *m/z*: calcd for C<sub>29</sub>H<sub>26</sub>NO<sub>2</sub>, [M + H]<sup>+</sup> 420.1958, found 420.1962.

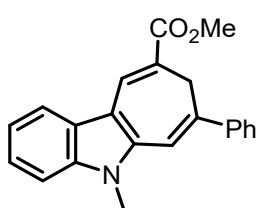

Methyl 5-methyl-7-phenyl-5,8-dihydrocyclohepta[*b*]indole-9-carboxylate (**3n**): yellow solid (50 mg, 77% yield), mp: 107–109 °C; <sup>1</sup>H

NMR (400 MHz, CDCl<sub>3</sub>, TMS, 25 °C)  $\delta$  = 8.22 (s, 1H), 7.85 (t, *J* = 7.1 Hz, 3H), 7.42 (t, *J* = 7.6 Hz, 2H), 7.39–7.36 (m, 2H), 7.34 (d, *J* = 7.6 Hz,

1H), 7.26 (d, *J* = 6.8 Hz, 1H), 7.05 (s, 1H), 3.85 (d, *J* = 3.9 Hz, 6H), 3.35 ppm (s, 2H); <sup>13</sup>C NMR (100 MHz, CDCl<sub>3</sub>, 25 °C)  $\delta$  = 167.0, 141.2, 140.5, 137.6, 136.2, 130.5, 128.7, 128.0, 127.1, 126.6, 123.8, 120.7, 119.0, 115.3, 113.6, 109.3, 51.9, 30.1, 30.0 ppm. IR (KBr)  $\nu$  = 3056, 2947, 1693, 1603, 1495, 1261, 1197, 1089, 741, 442 cm<sup>-1</sup>; HRMS (ESI, TOF) *m/z*: calcd for C<sub>22</sub>H<sub>20</sub>NO<sub>2</sub>, [M + H]<sup>+</sup> 330.1489, found 330.1485.

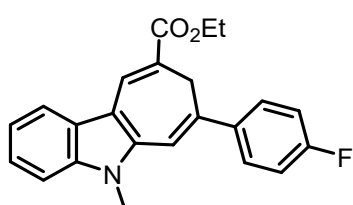

Ethyl 7-(4-fluorophenyl)-5-methyl-5,8-dihydrocyclohepta[*b*]indole-9-carboxylate (**3o**): yellow solid (53

mg, 74% yield), mp: 90–92 °C;  $^1\text{H}$  NMR (400 MHz,  $\text{CDCl}_3$ , TMS, 25 °C)  $\delta$  = 8.22 (s, 1H), 7.89–7.80 (m, 3H), 7.41–7.36 (m, 2H), 7.26 (d,  $J$  = 4.3 Hz, 1H), 7.10 (t,  $J$  = 8.6 Hz, 2H), 6.98 (s, 1H), 4.29 (q,  $J$  = 7.1 Hz, 2H), 3.85 (s, 3H), 3.30 (s, 2H), 1.36 ppm (t,  $J$  = 7.1 Hz, 3H);  $^{13}\text{C}$  NMR (100 MHz,  $\text{CDCl}_3$ , 25 °C)  $\delta$  = 166.5, 163.8 (d,  $^1J_{\text{C-F}}$  = 247.0 Hz), 141.1, 137.6, 136.5 (d,  $^4J_{\text{C-F}}$  = 3.0 Hz), 134.9, 130.3, 128.9 (d,  $^3J_{\text{C-F}}$  = 8.0 Hz), 126.6, 123.9, 120.7, 119.1, 115.6 (d,  $^2J_{\text{C-F}}$  = 21.0 Hz), 115.5, (d,  $^3J_{\text{C-F}}$  = 7.0 Hz), 113.2, 109.3, 60.7, 30.2, 30.1, 14.5 ppm;  $^{19}\text{F}$  NMR (377 MHz,  $\text{CDCl}_3$ , 25 °C)  $\delta$  = -113.9 (m, 1F) ppm. IR (KBr)  $\nu$  = 3055, 2980, 1689, 1601, 1510, 1260, 1194, 1088, 831, 742, 427  $\text{cm}^{-1}$ ; HRMS (ESI, TOF)  $m/z$ : calcd for  $\text{C}_{23}\text{H}_{21}\text{FNO}_2$ ,  $[\text{M} + \text{H}]^+$  362.1551, found 362.1547.

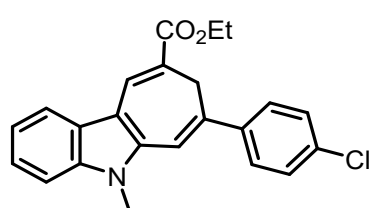

Ethyl 7-(4-chlorophenyl)-5-methyl-5,8-dihydrocyclohepta[b]indole-9-carboxylate (**3p**): yellow solid (58 mg, 78% yield), mp: 126–128 °C;  $^1\text{H}$  NMR (400 MHz,  $\text{CDCl}_3$ , TMS, 25 °C)  $\delta$  = 8.22 (s, 1H), 7.86 (d,  $J$  = 7.9 Hz, 1H),

7.81 (d,  $J$  = 8.3 Hz, 2H), 7.38 (dd,  $J$  = 6.2, 3.8 Hz, 4H), 7.28 (s, 1H), 7.03 (s, 1H), 4.30 (q,  $J$  = 7.1 Hz, 2H), 3.86 (s, 3H), 3.29 (s, 2H), 1.37 ppm (t,  $J$  = 7.1 Hz, 3H);  $^{13}\text{C}$  NMR (100 MHz,  $\text{CDCl}_3$ , 25 °C)  $\delta$  = 166.5, 140.9, 138.8, 137.6, 134.6, 133.7, 130.3, 128.8, 128.4, 126.6, 124.0, 120.7, 119.2, 115.7, 115.6, 113.6, 109.3, 60.7, 30.1, 30.0, 14.5 ppm. IR (KBr)  $\nu$  = 3057, 2928, 1690, 1603, 1492, 1260, 1194, 1091, 823, 741, 443  $\text{cm}^{-1}$ ; HRMS (ESI, TOF)  $m/z$ : calcd for  $\text{C}_{23}\text{H}_{21}\text{ClNO}_2$ ,  $[\text{M} + \text{H}]^+$  378.1255, found 378.1259 ( $^{35}\text{Cl}$ ) and 380.1229 ( $^{37}\text{Cl}$ ).

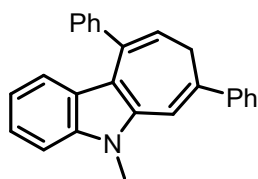

5-Methyl-7,10-diphenyl-5,8-dihydrocyclohepta[b]indole (**8a**): yellow solid (40 mg, 59% yield), mp: 193–195 °C;  $^1\text{H}$  NMR (400 MHz,  $\text{CDCl}_3$ , TMS, 25 °C)  $\delta$  = 7.64 (d,  $J$  = 7.4 Hz, 2H), 7.37 (dt,  $J$  = 20.5, 8.0 Hz, 6H), 7.29 (q,  $J$  = 3.5 Hz, 4H), 7.24–7.21 (m, 1H), 6.97 (s, 1H), 6.89 (t,  $J$  = 7.5

Hz, 1H), 6.82 (d,  $J$  = 8.0 Hz, 1H), 5.62 (t,  $J$  = 7.4 Hz, 1H), 3.86 (s, 3H), 3.00 ppm (d,  $J$  = 8.0 Hz, 2H);  $^{13}\text{C}$  NMR (100 MHz,  $\text{CDCl}_3$ , 25 °C)  $\delta$  = 141.7, 141.1, 140.0, 137.83, 137.77, 137.1, 129.0, 128.6, 128.0, 127.6, 127.2, 127.1, 126.0, 122.6, 122.2, 119.1, 116.4, 116.0, 113.5, 108.8, 31.6, 30.1 ppm. IR (KBr)  $\nu$  = 3054, 2931, 1599, 1492, 1468, 909, 742, 698, 446  $\text{cm}^{-1}$ ; HRMS (ESI, TOF)  $m/z$ : calcd for  $\text{C}_{26}\text{H}_{22}\text{N}$ ,  $[\text{M} + \text{H}]^+$  348.1747, found 348.1746.

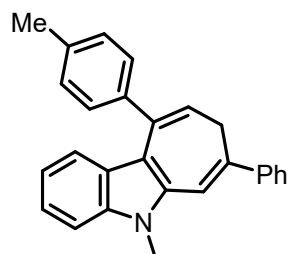

5-Methyl-7-phenyl-10-(*p*-tolyl)-5,8-dihydrocyclohepta[b]indole (**8b**): yellow solid (48 mg, 67% yield), mp: 188–190 °C;  $^1\text{H}$  NMR (400 MHz,  $\text{CDCl}_3$ , TMS, 25 °C)  $\delta$  = 7.56 (d,  $J$  = 6.9 Hz, 2H), 7.32 (t,  $J$  = 7.6 Hz,

2H), 7.24 (d,  $J = 7.1$  Hz, 1H), 7.19–7.13 (m, 4H), 7.02 (d,  $J = 7.7$  Hz, 2H), 6.89 (s, 1H), 6.86–6.77 (m, 2H), 5.52 (t,  $J = 7.4$  Hz, 1H), 3.79 (s, 3H), 2.91 (d,  $J = 7.2$  Hz, 2H), 2.29 ppm (s, 3H);  $^{13}\text{C}$  NMR (100 MHz,  $\text{CDCl}_3$ , 25 °C)  $\delta = 141.1, 140.0, 138.8, 137.9, 137.6, 137.1, 136.7, 128.8, 128.7, 128.5, 127.5, 127.2, 126.1, 122.5, 122.3, 119.0, 116.2, 115.8, 113.4, 108.7, 31.6, 30.1, 21.2$  ppm. IR (KBr)  $\nu = 3025, 2926, 1599, 1467, 908, 819, 740, 696, 447$   $\text{cm}^{-1}$ ; HRMS (ESI, TOF)  $m/z$ : calcd for  $\text{C}_{27}\text{H}_{24}\text{N}$ ,  $[\text{M} + \text{H}]^+$  362.1903, found 362.1902.

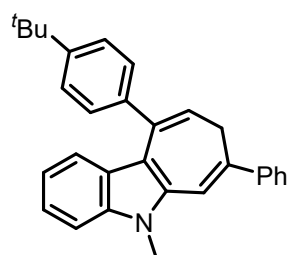

10-(4-(*tert*-Butyl)phenyl)-5-methyl-7-phenyl-5,8-dihydrocyclohepta[*b*]indole (**8c**): yellow solid (57 mg, 71% yield), mp: 167–169 °C;  $^1\text{H}$  NMR (400 MHz,  $\text{CDCl}_3$ , TMS, 25 °C)  $\delta = 7.55$  (d,  $J = 6.9$  Hz, 2H), 7.33–7.29 (m, 2H), 7.24–7.16 (m, 7H), 6.88 (s, 1H), 6.85–6.78 (m, 2H), 5.54 (t,  $J = 7.4$  Hz, 1H), 3.78 (s, 3H), 2.90 (d,  $J = 8.0$  Hz,

2H), 1.25 ppm (s, 9H);  $^{13}\text{C}$  NMR (100 MHz,  $\text{CDCl}_3$ , 25 °C)  $\delta = 150.0, 141.2, 140.0, 138.7, 137.9, 137.4, 137.1, 128.5, 128.5, 127.5, 127.2, 126.1, 124.9, 122.5, 122.3, 119.0, 116.2, 116.1, 113.4, 108.7, 34.5, 31.6, 31.4, 30.1$  ppm. IR (KBr)  $\nu = 3027, 2961, 1614, 1467, 909, 831, 739, 696, 426$   $\text{cm}^{-1}$ ; HRMS (ESI, TOF)  $m/z$ : calcd for  $\text{C}_{30}\text{H}_{30}\text{N}$ ,  $[\text{M} + \text{H}]^+$  404.2373, found 404.2372.

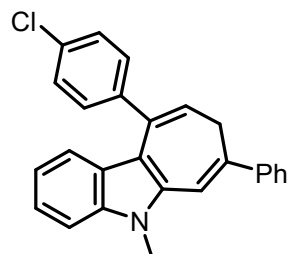

10-(4-Chlorophenyl)-5-methyl-7-phenyl-5,8-dihydrocyclohepta[*b*]indole (**8d**): yellow solid (39 mg, 52% yield), mp: 185–187 °C;  $^1\text{H}$  NMR (400 MHz,  $\text{CDCl}_3$ , TMS, 25 °C)  $\delta = 7.64$  (d,  $J = 7.1$  Hz, 2H), 7.44–7.30 (m, 5H), 7.25 (d,  $J = 3.5$  Hz, 4H), 6.97 (s, 1H), 6.93 (t,  $J = 7.5$  Hz, 1H), 6.83 (d,  $J = 8.0$  Hz, 1H), 5.60 (t,  $J = 7.4$  Hz,

1H), 3.86 (s, 3H), 2.99 ppm (d,  $J = 8.0$  Hz, 2H);  $^{13}\text{C}$  NMR (100 MHz,  $\text{CDCl}_3$ , 25 °C)  $\delta = 140.9, 140.13, 140.08, 137.9, 137.1, 136.6, 132.9, 130.2, 128.6, 128.2, 127.7, 127.2, 125.8, 122.7, 122.0, 119.2, 116.6, 115.5, 113.5, 108.9, 31.5, 30.1$  ppm. IR (KBr)  $\nu = 3055, 2931, 1597, 1490, 1468, 1091, 908, 828, 740, 427$   $\text{cm}^{-1}$ ; HRMS (ESI, TOF)  $m/z$ : calcd for  $\text{C}_{26}\text{H}_{21}\text{ClN}$ ,  $[\text{M} + \text{H}]^+$  382.1357, found 382.1357 ( $^{35}\text{Cl}$ ) and 384.1331 ( $^{37}\text{Cl}$ ).

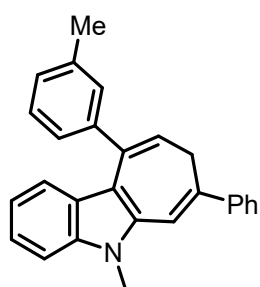

5-Methyl-7-phenyl-10-(*m*-tolyl)-5,8-dihydrocyclohepta[*b*]indole (**8e**): yellow solid (41 mg, 58% yield), mp: 89–91 °C;  $^1\text{H}$  NMR (400 MHz,  $\text{CDCl}_3$ , TMS, 25 °C)  $\delta = 7.64$  (d,  $J = 7.0$  Hz, 2H), 7.42–7.34 (m, 3H), 7.31 (d,  $J = 7.3$  Hz, 1H), 7.22 (d,  $J = 8.1$  Hz, 1H), 7.20–7.14 (m, 2H), 7.10 (d,  $J = 7.5$  Hz, 2H), 6.97 (s, 1H), 6.92–6.82 (m, 2H), 5.62 (t,  $J = 7.4$  Hz, 1H),

3.86 (s, 3H), 2.99 (d,  $J = 7.2$  Hz, 2H), 2.30 ppm (s, 3H);  $^{13}\text{C}$  NMR (100 MHz,  $\text{CDCl}_3$ , 25 °C)  $\delta = 141.6, 141.1, 139.9, 137.83, 137.81, 137.5, 137.1, 129.6, 128.5, 127.85, 127.81, 127.5, 127.2, 126.2, 126.1, 122.5, 122.2, 119.0, 116.3, 116.1, 113.5, 108.7, 31.6, 30.1, 21.4$  ppm. IR (KBr)  $\nu = 3053, 2931, 1601, 1492, 1468, 909, 741, 697, 447$   $\text{cm}^{-1}$ ; HRMS (ESI, TOF)  $m/z$ : calcd for  $\text{C}_{27}\text{H}_{24}\text{N}$ ,  $[\text{M} + \text{H}]^+$  362.1903, found 362.1902.

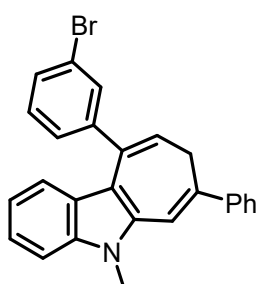

10-(3-Bromophenyl)-5-methyl-7-phenyl-5,8-dihydrocyclohepta[*b*]indole (**8f**): yellow solid (45 mg, 53% yield), mp: 94–96 °C;  $^1\text{H}$  NMR (400 MHz,  $\text{CDCl}_3$ , TMS, 25 °C)  $\delta = 7.64$  (d,  $J = 7.7$  Hz, 2H), 7.54 (s, 1H), 7.43–7.35 (m, 4H), 7.32 (d,  $J = 7.3$  Hz, 1H), 7.26–7.20 (m, 2H), 7.13 (t,  $J = 7.8$  Hz, 1H), 7.00–6.90 (m, 2H), 6.84 (d,  $J = 7.9$  Hz, 1H), 5.62 (t,  $J = 7.4$  Hz, 1H),

3.86 (s, 3H), 2.99 ppm (d,  $J = 8.0$  Hz, 2H);  $^{13}\text{C}$  NMR (100 MHz,  $\text{CDCl}_3$ , 25 °C)  $\delta = 143.8, 140.9, 140.1, 137.8, 137.1, 136.5, 131.7, 130.0, 129.5, 128.6, 127.73, 127.68, 127.2, 125.7, 122.7, 122.2, 122.0, 119.3, 117.2, 115.3, 113.5, 108.9, 31.5, 30.1$  ppm. IR (KBr)  $\nu = 3056, 2932, 1592, 1494, 1469, 908, 734, 694, 427$   $\text{cm}^{-1}$ ; HRMS (ESI, TOF)  $m/z$ : calcd for  $\text{C}_{26}\text{H}_{21}\text{BrN}$ ,  $[\text{M} + \text{H}]^+$  426.0852, found 426.0853 ( $^{79}\text{Br}$ ) and 428.0831 ( $^{81}\text{Br}$ ).

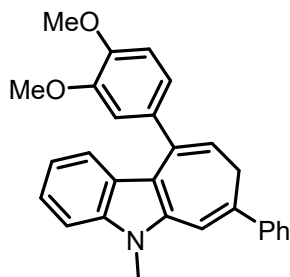

10-(3,4-Dimethoxyphenyl)-5-methyl-7-phenyl-5,8-dihydrocyclohepta[*b*]indole (**8g**): yellow solid (58 mg, 72% yield), mp: 108–110 °C;  $^1\text{H}$  NMR (400 MHz,  $\text{CDCl}_3$ , TMS, 25 °C)  $\delta = 7.65$  (d,  $J = 7.1$  Hz, 2H), 7.39 (q,  $J = 7.0, 6.5$  Hz, 3H), 7.31 (dd,  $J = 14.7, 7.3$  Hz, 2H), 7.22 (dd,  $J = 8.4, 2.9$  Hz, 1H), 6.97 (s, 1H), 6.93 (dd,  $J = 8.3, 1.9$

Hz, 1H), 6.91–6.88 (m, 2H), 6.86 (d,  $J = 2.0$  Hz, 1H), 6.82 (d,  $J = 8.3$  Hz, 1H), 5.60 (t,  $J = 7.4$  Hz, 1H), 3.90 (s, 3H), 3.86 (s, 3H), 3.72 (s, 3H), 2.98 ppm (s, 2H);  $^{13}\text{C}$  NMR (100 MHz,  $\text{CDCl}_3$ , 25 °C)  $\delta = 148.34, 148.31, 141.0, 140.0, 137.9, 137.4, 137.1, 134.8, 128.6, 127.5, 127.2, 126.0, 122.6, 122.3, 121.3, 119.0, 116.1, 115.2, 113.4, 112.5, 110.7, 108.7, 55.9, 55.8, 31.5, 30.1$  ppm. IR (KBr)  $\nu = 3055, 2932, 1600, 1511, 1466, 1263, 1246, 1138, 1027, 909, 733, 697, 562$   $\text{cm}^{-1}$ ; HRMS (ESI, TOF)  $m/z$ : calcd for  $\text{C}_{28}\text{H}_{26}\text{NO}_2$ ,  $[\text{M} + \text{H}]^+$  408.1958, found 408.1956.

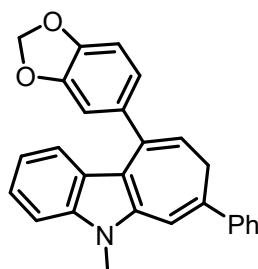

10-(Benzo[*d*][1,3]dioxol-5-yl)-5-methyl-7-phenyl-5,8-dihydrocyclohepta[*b*]indole (**8h**): yellow solid (60 mg, 77% yield), mp: 202–204 °C;  $^1\text{H}$  NMR (400 MHz,  $\text{CDCl}_3$ , TMS, 25 °C)  $\delta = 7.66$ –7.60 (m, 2H), 7.39 (t,  $J = 7.6$  Hz, 2H), 7.33 (dd,  $J = 15.1, 7.8$  Hz, 2H), 7.29–7.20



(m, 2H), 6.98–6.91 (m, 3H), 6.86–6.78 (m, 2H), 6.74 (d,  $J = 8.0$  Hz, 1H), 5.94 (s, 2H), 5.55 (t,  $J = 7.4$  Hz, 1H), 3.84 (s, 3H), 2.95 ppm (s, 2H);  $^{13}\text{C}$  NMR (100 MHz,  $\text{CDCl}_3$ , 25 °C)  $\delta = 147.3, 146.8, 141.0, 140.0, 138.0, 137.3, 137.1, 136.2, 128.6, 127.6, 127.2, 126.0, 122.6, 122.5, 122.2, 119.2, 116.1, 115.5, 113.4, 109.6, 108.8, 107.9, 100.9, 31.5, 30.1$  ppm. IR (KBr)  $\nu = 3055, 2931, 1598, 1485, 1436, 1239, 1039, 909, 811, 743, 697$   $\text{cm}^{-1}$ ; HRMS (ESI, TOF)  $m/z$ : calcd for  $\text{C}_{27}\text{H}_{22}\text{NO}_2$ ,  $[\text{M} + \text{H}]^+$  392.1645, found 392.1646.

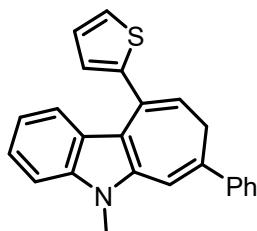

5-Methyl-10-(thiophen-2-yl)-7-(*p*-tolyl)-5,8-dihydrocyclohepta[*b*]indole

(**8i**): yellow solid (57 mg, 79% yield), mp: 196–198 °C;  $^1\text{H}$  NMR (400

MHz,  $\text{CDCl}_3$ , TMS, 25 °C)  $\delta = 7.56$  (d,  $J = 7.4$  Hz, 2H), 7.35–7.27 (m, 3H), 7.24–7.16 (m, 2H), 7.14–7.07 (m, 2H), 6.94–6.85 (m, 4H), 5.68 (t,  $J$

$= 7.4$  Hz, 1H), 3.77 (s, 3H), 2.88 ppm (s, 2H);  $^{13}\text{C}$  NMR (100 MHz,  $\text{CDCl}_3$ , 25 °C)  $\delta = 144.7, 140.8, 139.9, 138.5, 137.1, 130.4, 128.6, 127.7, 127.2, 127.0, 126.0, 125.8, 124.2, 122.7, 122.2, 119.1, 116.8, 115.8, 113.6, 108.9, 31.4, 30.1$  ppm. IR (KBr)  $\nu = 3056, 2923, 1597, 1493, 1468, 1261, 908, 830, 741, 695, 424$   $\text{cm}^{-1}$ ; HRMS (ESI, TOF)  $m/z$ : calcd for  $\text{C}_{25}\text{H}_{22}\text{NS}$ ,  $[\text{M} + \text{H}]^+$  368.1467, found 368.1466.

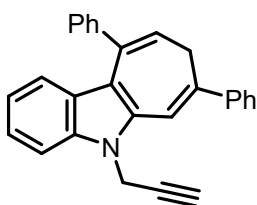

7,10-Diphenyl-5-(prop-2-yn-1-yl)-5,8-dihydrocyclohepta[*b*]indole (**8j**):

yellow solid (54 mg, 74% yield), mp: 98–100 °C;  $^1\text{H}$  NMR (400 MHz,  $\text{CDCl}_3$ , TMS, 25 °C)  $\delta = 7.58$  (d,  $J = 7.4$  Hz, 2H), 7.38 (d,  $J = 8.2$  Hz, 1H),

7.33 (t,  $J = 7.6$  Hz, 2H), 7.28 (d,  $J = 3.3$  Hz, 1H), 7.23 (q,  $J = 4.4, 3.6$  Hz,

4H), 7.19 (d,  $J = 3.3$  Hz, 2H), 6.99 (s, 1H), 6.85 (t,  $J = 7.5$  Hz, 1H), 6.75 (d,  $J = 8.0$  Hz, 1H), 5.58 (t,  $J = 7.4$  Hz, 1H), 4.94 (d,  $J = 2.5$  Hz, 2H), 2.94 (d,  $J = 7.3$  Hz, 2H), 2.27 ppm (d,  $J = 2.5$  Hz, 1H);  $^{13}\text{C}$  NMR (100 MHz,  $\text{CDCl}_3$ , 25 °C)  $\delta = 141.4, 140.8, 139.3, 138.2, 137.7, 136.3, 129.0, 128.6, 128.0, 127.7, 127.3, 127.2, 126.4, 123.0, 122.4, 119.6, 116.93, 116.90, 112.9, 109.0, 78.1, 72.7, 33.2, 31.7$  ppm. IR (KBr)  $\nu = 3055, 2923, 1600, 1463, 1260, 1022, 800, 747, 698, 440$   $\text{cm}^{-1}$ ; HRMS (ESI, TOF)  $m/z$ : calcd for  $\text{C}_{28}\text{H}_{22}\text{N}$ ,  $[\text{M} + \text{H}]^+$  372.1747, found 372.1748.

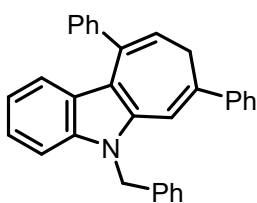

5-Benzyl-7,10-diphenyl-5,8-dihydrocyclohepta[*b*]indole (**8k**): yellow

solid (68 mg, 81% yield), mp: 120–122 °C;  $^1\text{H}$  NMR (400 MHz,  $\text{CDCl}_3$ ,

TMS, 25 °C)  $\delta = 7.54$  (d,  $J = 7.4$  Hz, 2H), 7.40–7.33 (m, 4H), 7.30 (td,  $J = 8.8, 7.8, 3.3$  Hz, 7H), 7.25 (dd,  $J = 7.1, 2.6$  Hz, 2H), 7.18 (d,  $J = 7.4$  Hz,

1H), 7.13 (d,  $J = 7.6$  Hz, 2H), 6.92–6.83 (m, 3H), 5.66 (t,  $J = 7.4$  Hz, 1H), 5.51 (s, 2H), 3.01 ppm

(d,  $J = 7.3$  Hz, 2H);  $^{13}\text{C}$  NMR (100 MHz,  $\text{CDCl}_3$ , 25 °C)  $\delta = 141.6, 140.9, 140.0, 138.2, 137.8, 137.5, 136.9, 129.0, 128.9, 128.5, 128.1, 127.54, 127.47, 127.20, 127.17, 126.3, 126.2, 122.8, 122.3, 119.4, 116.8, 116.5, 113.3, 109.4, 47.2, 31.7$  ppm. IR (KBr)  $\nu = 3057, 2925, 1599, 1494, 1337, 908, 741, 699, 441$   $\text{cm}^{-1}$ ; HRMS (ESI, TOF)  $m/z$ : calcd for  $\text{C}_{32}\text{H}_{26}\text{N}$ ,  $[\text{M} + \text{H}]^+ 424.2060$ , found 424.2061.

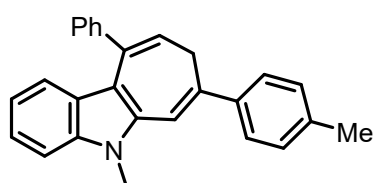

5-Methyl-10-phenyl-7-(*p*-tolyl)-5,8-

dihydrocyclohepta[*b*]indole (**8I**): yellow solid (56 mg, 78% yield), mp: 182–184 °C;  $^1\text{H}$  NMR (400 MHz,  $\text{CDCl}_3$ , TMS, 25

°C)  $\delta = 7.54$  (d,  $J = 7.9$  Hz, 2H), 7.37–7.31 (m, 3H), 7.30–7.26

(m, 3H), 7.24–7.17 (m, 3H), 6.94 (s, 1H), 6.89 (t,  $J = 7.5$  Hz, 1H), 6.81 (d,  $J = 8.0$  Hz, 1H), 5.60 (t,  $J = 7.4$  Hz, 1H), 3.85 (s, 3H), 2.98 (d,  $J = 7.3$  Hz, 2H), 2.38 ppm (s, 3H);  $^{13}\text{C}$  NMR (100 MHz,  $\text{CDCl}_3$ , 25 °C)  $\delta = 141.7, 140.2, 138.2, 137.8, 137.7, 137.5, 137.1, 129.3, 129.0, 128.0, 127.1, 127.0, 126.0, 122.4, 122.1, 119.0, 116.4, 115.8, 112.8, 108.8, 31.6, 30.1, 21.2$  ppm. IR (KBr)  $\nu = 3052, 2924, 1600, 1510, 1467, 1336, 815, 740, 700, 442$   $\text{cm}^{-1}$ ; HRMS (ESI, TOF)  $m/z$ : calcd for  $\text{C}_{27}\text{H}_{24}\text{N}$ ,  $[\text{M} + \text{H}]^+ 362.1903$ , found 362.1904.

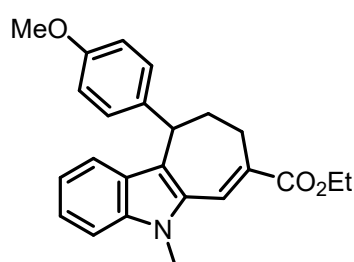

Ethyl

10-(4-methoxyphenyl)-5-methyl-5,8,9,10-

tetrahydrocyclohepta[*b*]indole-7-carboxylate (**10a**): yellow oil (99 mg, 88% yield);  $^1\text{H}$  NMR (400 MHz,  $\text{CDCl}_3$ , TMS, 25 °C)  $\delta$

$= 7.93$  (d,  $J = 2.3$  Hz, 1H), 7.26 (dd,  $J = 11.8, 8.2$  Hz, 2H), 7.22 – 7.18 (m, 1H), 6.96 (dd,  $J = 13.1, 8.3$  Hz, 3H), 6.75 (d,  $J = 8.6$  Hz,

2H), 4.74 (d,  $J = 4.3$  Hz, 1H), 4.25 (q,  $J = 7.1$  Hz, 2H), 3.84 (s, 3H), 3.72 (s, 3H), 2.88 (dd,  $J = 18.1, 6.4$  Hz, 1H), 2.41 – 2.24 (m, 2H), 2.15 – 2.07 (m, 1H), 1.33 ppm (t,  $J = 7.1$  Hz, 3H) ppm;  $^{13}\text{C}$  NMR (100 MHz,  $\text{CDCl}_3$ , 25 °C)  $\delta = 168.3, 157.8, 138.5, 138.1, 132.2, 131.9, 129.2, 127.4, 126.2, 123.6, 121.9, 120.1, 119.6, 113.6, 109.4, 61.0, 55.2, 41.3, 31.1, 29.7, 24.6, 14.4$  ppm. IR (KBr)  $\nu = 3055, 2932, 1698, 1625, 1510, 1248, 1032, 910, 831, 739$   $\text{cm}^{-1}$ ; HRMS (ESI, TOF)  $m/z$ : calcd for  $\text{C}_{24}\text{H}_{26}\text{NO}_3$ ,  $[\text{M} + \text{H}]^+ 376.1907$ , found 376.1909.

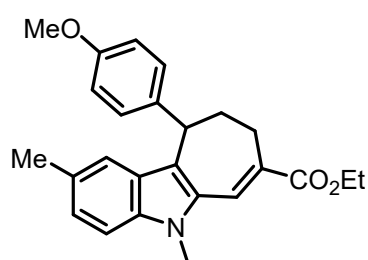

Ethyl

10-(4-methoxyphenyl)-2,5-dimethyl-5,8,9,10-

tetrahydrocyclohepta[*b*]indole-7-carboxylate (**10b**): yellow oil (108 mg, 93% yield);  $^1\text{H}$  NMR (400 MHz,  $\text{CDCl}_3$ , TMS, 25 °C)

$\delta = 7.91$  (d,  $J = 2.5$  Hz, 1H), 7.16 (d,  $J = 8.3$  Hz, 1H), 7.03 (d,  $J = 9.2$  Hz, 2H), 6.98 (d,  $J = 8.2$  Hz, 2H), 6.76 (d,  $J = 8.3$  Hz, 2H),

4.72 (d,  $J = 4.2$  Hz, 1H), 4.24 (q,  $J = 7.3$  Hz, 2H), 3.82 (s, 3H), 3.72 (s, 3H), 2.88 (dd,  $J = 17.8, 5.3$  Hz, 1H), 2.30 (s, 5H), 2.09 (t,  $J = 12.5$  Hz, 1H), 1.32 ppm (t,  $J = 7.1$  Hz, 3H);  $^{13}\text{C}$  NMR (100 MHz,  $\text{CDCl}_3$ , 25 °C)  $\delta = 168.4, 157.8, 138.4, 136.6, 132.2, 131.3, 129.2, 128.9, 127.5, 126.3, 125.5, 121.4, 119.3, 113.6, 109.2, 60.9, 55.2, 41.0, 30.9, 29.7, 24.7, 21.4, 14.4$  ppm. IR (KBr)  $\nu = 3056, 2931, 1698, 1625, 1509, 1247, 1032, 910, 831, 736$   $\text{cm}^{-1}$ ; HRMS (ESI, TOF)  $m/z$ : calcd for  $\text{C}_{25}\text{H}_{28}\text{NO}_3$ ,  $[\text{M} + \text{H}]^+$  390.2064, found 390.2065.

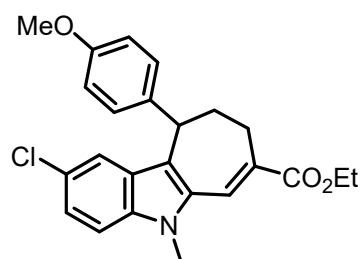

Ethyl 2-chloro-10-(4-methoxyphenyl)-5-methyl-5,8,9,10-tetrahydrocyclohepta[b]indole-7-carboxylate (**10c**): yellow oil (104 mg, 85% yield);  $^1\text{H}$  NMR (400 MHz,  $\text{CDCl}_3$ , TMS, 25 °C)  $\delta = 7.88$  (d,  $J = 2.4$  Hz, 1H), 7.21–7.15 (m, 2H), 7.12 (dd,  $J = 8.8, 1.9$  Hz, 1H), 6.95 (d,  $J = 8.7$  Hz, 2H), 6.76 (d,  $J = 8.4$  Hz, 2H),

4.65 (d,  $J = 4.2$  Hz, 1H), 4.25 (q,  $J = 7.1$  Hz, 2H), 3.81 (s, 3H), 3.73 (s, 3H), 2.88 (dd,  $J = 18.2, 6.4$  Hz, 1H), 2.38–2.23 (m, 2H), 2.13–2.04 (m, 1H), 1.33 ppm (t,  $J = 7.1$  Hz, 3H);  $^{13}\text{C}$  NMR (100 MHz,  $\text{CDCl}_3$ , 25 °C)  $\delta = 168.1, 158.0, 137.9, 136.4, 133.3, 132.9, 129.1, 128.2, 125.7, 125.2, 123.8, 121.2, 119.2, 113.7, 110.5, 61.1, 55.2, 41.0, 30.9, 29.9, 24.6, 14.4$  ppm. IR (KBr)  $\nu = 3056, 2978, 2931, 1699, 1625, 1509, 1247, 1033, 910, 832, 737$   $\text{cm}^{-1}$ ; HRMS (ESI, TOF)  $m/z$ : calcd for  $\text{C}_{24}\text{H}_{25}\text{ClNO}_3$ ,  $[\text{M} + \text{H}]^+$  410.1517, found 410.1520 ( $^{35}\text{Cl}$ ) and 412.1489 ( $^{37}\text{Cl}$ ).

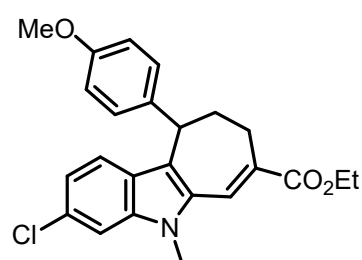

Ethyl 3-chloro-10-(4-methoxyphenyl)-5-methyl-5,8,9,10-tetrahydrocyclohepta[b]indole-7-carboxylate (**10d**): yellow oil (111 mg, 91% yield);  $^1\text{H}$  NMR (400 MHz,  $\text{CDCl}_3$ , TMS, 25 °C)  $\delta = 7.87$  (d,  $J = 2.2$  Hz, 1H), 7.25 (d,  $J = 1.7$  Hz, 1H), 7.10 (d,  $J = 8.5$  Hz, 1H), 6.95 (d,  $J = 8.3$  Hz, 2H), 6.87 (dd,  $J = 8.4, 1.8$  Hz,

1H), 6.75 (d,  $J = 8.3$  Hz, 2H), 4.66 (d,  $J = 4.4$  Hz, 1H), 4.25 (q,  $J = 7.1$  Hz, 2H), 3.78 (s, 3H), 3.72 (s, 3H), 2.87 (dd,  $J = 18.1, 6.5$  Hz, 1H), 2.37 (dd,  $J = 18.0, 11.8$  Hz, 1H), 2.25 (dt,  $J = 11.6, 5.0$  Hz, 1H), 2.14–2.04 (m, 1H), 1.33 ppm (t,  $J = 7.1$  Hz, 3H);  $^{13}\text{C}$  NMR (100 MHz,  $\text{CDCl}_3$ , 25 °C)  $\delta = 168.1, 157.9, 138.4, 138.2, 132.9, 132.7, 129.5, 129.1, 126.0, 125.7, 121.9, 121.0, 120.3, 113.7, 109.3, 61.1, 55.2, 41.3, 31.1, 29.9, 24.6, 14.4$  ppm. IR (KBr)  $\nu = 3057, 2931, 1699, 1625, 1509, 1248, 1032, 909, 833, 735$   $\text{cm}^{-1}$ ; HRMS (ESI, TOF)  $m/z$ : calcd for  $\text{C}_{24}\text{H}_{25}\text{ClNO}_3$ ,  $[\text{M} + \text{H}]^+$  410.1517, found 410.1519 ( $^{35}\text{Cl}$ ) and 412.1488 ( $^{37}\text{Cl}$ ).

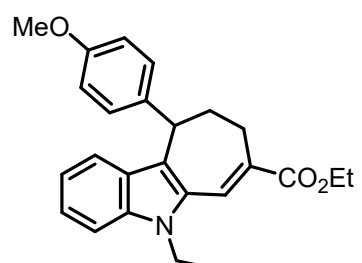

Ethyl 5-ethyl-10-(4-methoxyphenyl)-5,8,9,10-

tetrahydrocyclohepta[*b*]indole-7-carboxylate (**10e**): yellow oil (103 mg, 89% yield); <sup>1</sup>H NMR (400 MHz, CDCl<sub>3</sub>, TMS, 25 °C)  $\delta$  = 7.91 (d, *J* = 2.2 Hz, 1H), 7.27 (dd, *J* = 15.8, 8.2 Hz, 2H), 7.18 (t, *J* = 7.7 Hz, 1H), 6.96 (dd, *J* = 13.2, 8.0 Hz, 3H), 6.76 (d, *J* = 8.3 Hz, 2H), 4.74 (d, *J* = 4.3 Hz, 1H), 4.34 (q, *J* = 7.2 Hz, 2H), 4.25 (q, *J* = 7.1 Hz, 2H), 3.72 (s, 3H), 2.88 (dd, *J* = 18.1, 6.4 Hz, 1H), 2.37 (dd, *J* = 18.5, 11.6 Hz, 1H), 2.27 (dt, *J* = 11.5, 5.0 Hz, 1H), 2.17–2.09 (m, 1H), 1.42 (t, *J* = 7.2 Hz, 3H), 1.33 ppm (t, *J* = 7.1 Hz, 3H); <sup>13</sup>C NMR (100 MHz, CDCl<sub>3</sub>, 25 °C)  $\delta$  = 168.3, 157.8, 138.5, 137.1, 132.0, 131.1, 129.2, 127.6, 126.1, 123.5, 122.0, 120.2, 119.5, 113.6, 109.3, 61.0, 55.2, 41.3, 37.7, 31.1, 24.6, 15.7, 14.4 ppm. IR (KBr)  $\nu$  = 3055, 2978, 2931, 1699, 1624, 1509, 1246, 1033, 910, 832, 740 cm<sup>-1</sup>; HRMS (ESI, TOF) *m/z*: calcd for C<sub>25</sub>H<sub>28</sub>NO<sub>3</sub>, [M + H]<sup>+</sup> 390.2064, found 390.2065.

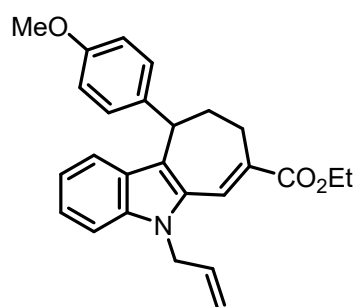

Ethyl 5-allyl-10-(4-methoxyphenyl)-5,8,9,10-tetrahydrocyclohepta[*b*]indole-7-carboxylate (**10f**): yellow oil (97 mg, 81% yield); <sup>1</sup>H NMR (400 MHz, CDCl<sub>3</sub>, TMS, 25 °C)  $\delta$  = 7.85 (d, *J* = 2.3 Hz, 1H), 7.27–7.23 (m, 2H), 7.21–7.15 (m, 1H), 6.97 (t, *J* = 8.4 Hz, 3H), 6.76 (d, *J* = 8.6 Hz, 2H), 6.02 (ddt, *J* = 16.8, 9.9, 4.7 Hz, 1H), 5.20 (dd, *J* = 10.1, 1.7 Hz, 1H), 5.01 (d, *J* = 17.3 Hz, 1H), 4.90 (d, *J* = 4.8 Hz, 2H), 4.79–4.71 (m, 1H), 4.23 (q, *J* = 7.1 Hz, 2H), 3.73 (s, 3H), 2.92–2.82 (m, 1H), 2.41–2.24 (m, 2H), 2.17–2.09 (m, 1H), 1.32 ppm (t, *J* = 7.1 Hz, 3H); <sup>13</sup>C NMR (100 MHz, CDCl<sub>3</sub>, 25 °C)  $\delta$  = 168.2, 157.8, 138.4, 137.6, 133.4, 132.0, 131.7, 129.2, 127.5, 126.3, 123.7, 122.2, 120.1, 119.8, 116.7, 113.7, 109.4, 60.9, 55.2, 45.3, 41.3, 31.1, 24.6, 14.4 ppm. IR (KBr)  $\nu$  = 3055, 2931, 1699, 1625, 1509, 1247, 1033, 914, 831, 740 cm<sup>-1</sup>; HRMS (ESI, TOF) *m/z*: calcd for C<sub>26</sub>H<sub>28</sub>NO<sub>3</sub>, [M + H]<sup>+</sup> 402.2064, found 402.2064.

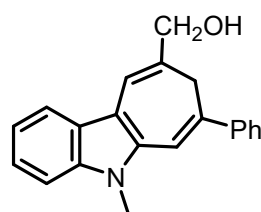

(5-Methyl-7-phenyl-5,8-dihydrocyclohepta[*b*]indol-9-yl)methanol (**11a**): yellow solid (55 mg, 92% yield), mp: 128–130 °C; <sup>1</sup>H NMR (400 MHz, CDCl<sub>3</sub>, TMS, 25 °C)  $\delta$  = 7.74 (d, *J* = 7.8 Hz, 1H), 7.65 (d, *J* = 7.4 Hz, 2H), 7.39 (t, *J* = 7.5 Hz, 2H), 7.34–7.28 (m, 3H), 7.17 (ddd, *J* = 8.0, 5.1, 2.9 Hz, 1H), 7.00 (s, 1H), 6.93 (s, 1H), 4.32 (s, 2H), 3.76 (s, 3H), 3.02 ppm (s, 2H); <sup>13</sup>C NMR (100 MHz, CDCl<sub>3</sub>, 25 °C)  $\delta$  = 140.9, 138.6, 137.3, 133.1, 128.8, 128.7, 127.7, 127.1, 126.3, 123.2, 119.7, 119.0, 118.0, 115.8, 113.9, 109.0, 67.1, 32.1, 29.9 ppm. IR (KBr)  $\nu$  = 3552, 3053, 2978, 1601, 1499, 1374, 1054, 747 cm<sup>-1</sup>; HRMS (ESI, TOF) *m/z*: calcd for C<sub>21</sub>H<sub>20</sub>NO, [M + H]<sup>+</sup> 302.1539, found

302.1542.

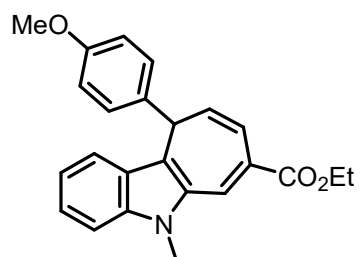

Ethyl 10-(4-methoxyphenyl)-5-methyl-5,10-dihydrocyclohepta[b]indole-7-carboxylate (**12a**): yellow solid (25 mg, 34% yield), mp: 119–121 °C; <sup>1</sup>H NMR (400 MHz, CDCl<sub>3</sub>, TMS, 25 °C)  $\delta$  = 7.51 (t,  $J$  = 8.2 Hz, 3H), 7.35 (d,  $J$  = 8.3 Hz, 1H), 7.23 (dd,  $J$  = 8.3, 1.2 Hz, 1H), 6.96 (d,  $J$  = 8.3 Hz, 2H),

6.91 (d,  $J$  = 7.5 Hz, 1H), 6.74 (d,  $J$  = 6.8 Hz, 1H), 6.66 (d,  $J$  = 8.1 Hz, 1H), 6.23 (s, 1H), 4.41–4.17 (m, 3H), 3.95 (s, 3H), 3.89 (s, 3H), 1.34 ppm (t,  $J$  = 7.1 Hz, 3H); <sup>13</sup>C NMR (100 MHz, CDCl<sub>3</sub>, 25 °C)  $\delta$  = 165.0, 160.3, 146.1, 137.9, 136.8, 134.1, 130.3, 128.5, 125.5, 123.2, 121.1, 120.6, 119.7, 115.9, 115.4, 114.0, 110.1, 61.8, 55.4, 29.9, 25.6, 14.3 ppm. IR (KBr)  $\nu$  = 3054, 2936, 1698, 1599, 1498, 1245, 1033, 907, 698 cm<sup>-1</sup>; HRMS (ESI, TOF)  $m/z$ : calcd for C<sub>24</sub>H<sub>24</sub>NO<sub>3</sub>, [M + H]<sup>+</sup> 374.1751, found 374.1750.

## 10. References

- (1) W. F. Bailey, D. P. Reed, D. R. Clark and G. N. Kapur, *Org. Lett.*, 2001, **3**, 1865–1868.
- (2) W. L. Chen, Y. R. Gao, S. Mao, Y. L. Zhang, Y. F. Wang and Y. Q. Wang, *Org. Lett.*, 2012, **14**, 5920–5923.
- (3) (a) S. Sun, C. Cheng, J. Yang, A. Taheri, D. Jiang, B. Zhang and Y. Gu, *Org. Lett.*, 2014, **16**, 4520–4523; (b) M. Li, C. Tang, J. Yang and Y. Gu, *Chem. Commun.*, 2011, **47**, 4529–4531.
- (4) (a) T. Takeda, S. Harada, A. Okabe and A. Nishida, *J. Org. Chem.*, 2018, **83**, 11541–11551; (b) G. Xu, L. Chen and J. Sun, *Org. Lett.*, 2018, **20**, 3408–3412; (c) Y. Yuan, X. Guo, X. Zhang, B. Li and Q. Huang, *Org. Chem. Front.*, 2020, **7**, 3146–3159; (d) W. L. Yang, W. Li, Z. T. Yang and W. P. Deng, *Org. Lett.*, 2020, **22**, 4026–4032.
- (5) (a) V. P. Charpe, A. Ragupathi, A. Sagadevan and K. C. Hwang, *Green Chem.*, 2021, **23**, 5024–5030; (b) G. Lupidi, A. Palmieri and M. Petrini, *Green Chem.*, 2022, **24**, 3629–3633. (c) X. Lei, G. K. Angeli, C. G. Neochoritis and A. Dömling, *Green Chem.*, 2022, **24**, 6168–6171.
- (6) C. M. Alder, J. D. Hayler, R. K. Henderson, A. M. Redman, L. Shukla, L. E. Shuster and H. F. Sneddon, *Green Chem.*, 2016, **18**, 3879–3890.

## 11. Copies of NMR spectra

1a

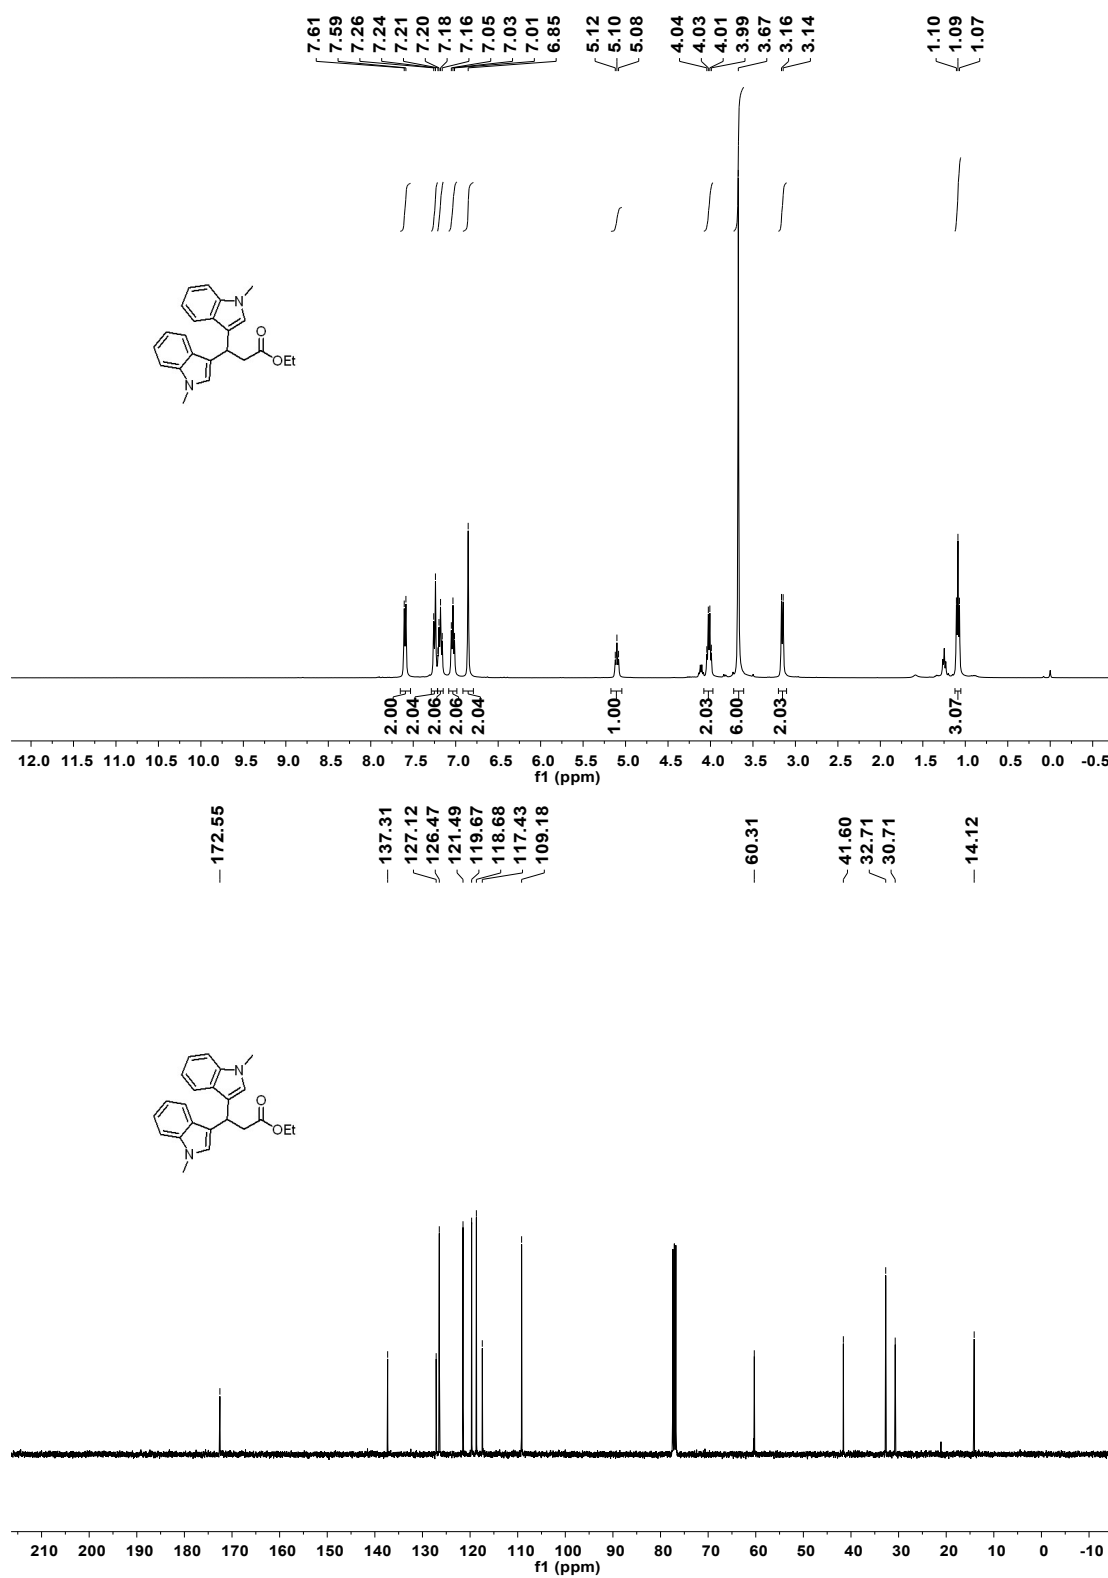

1b

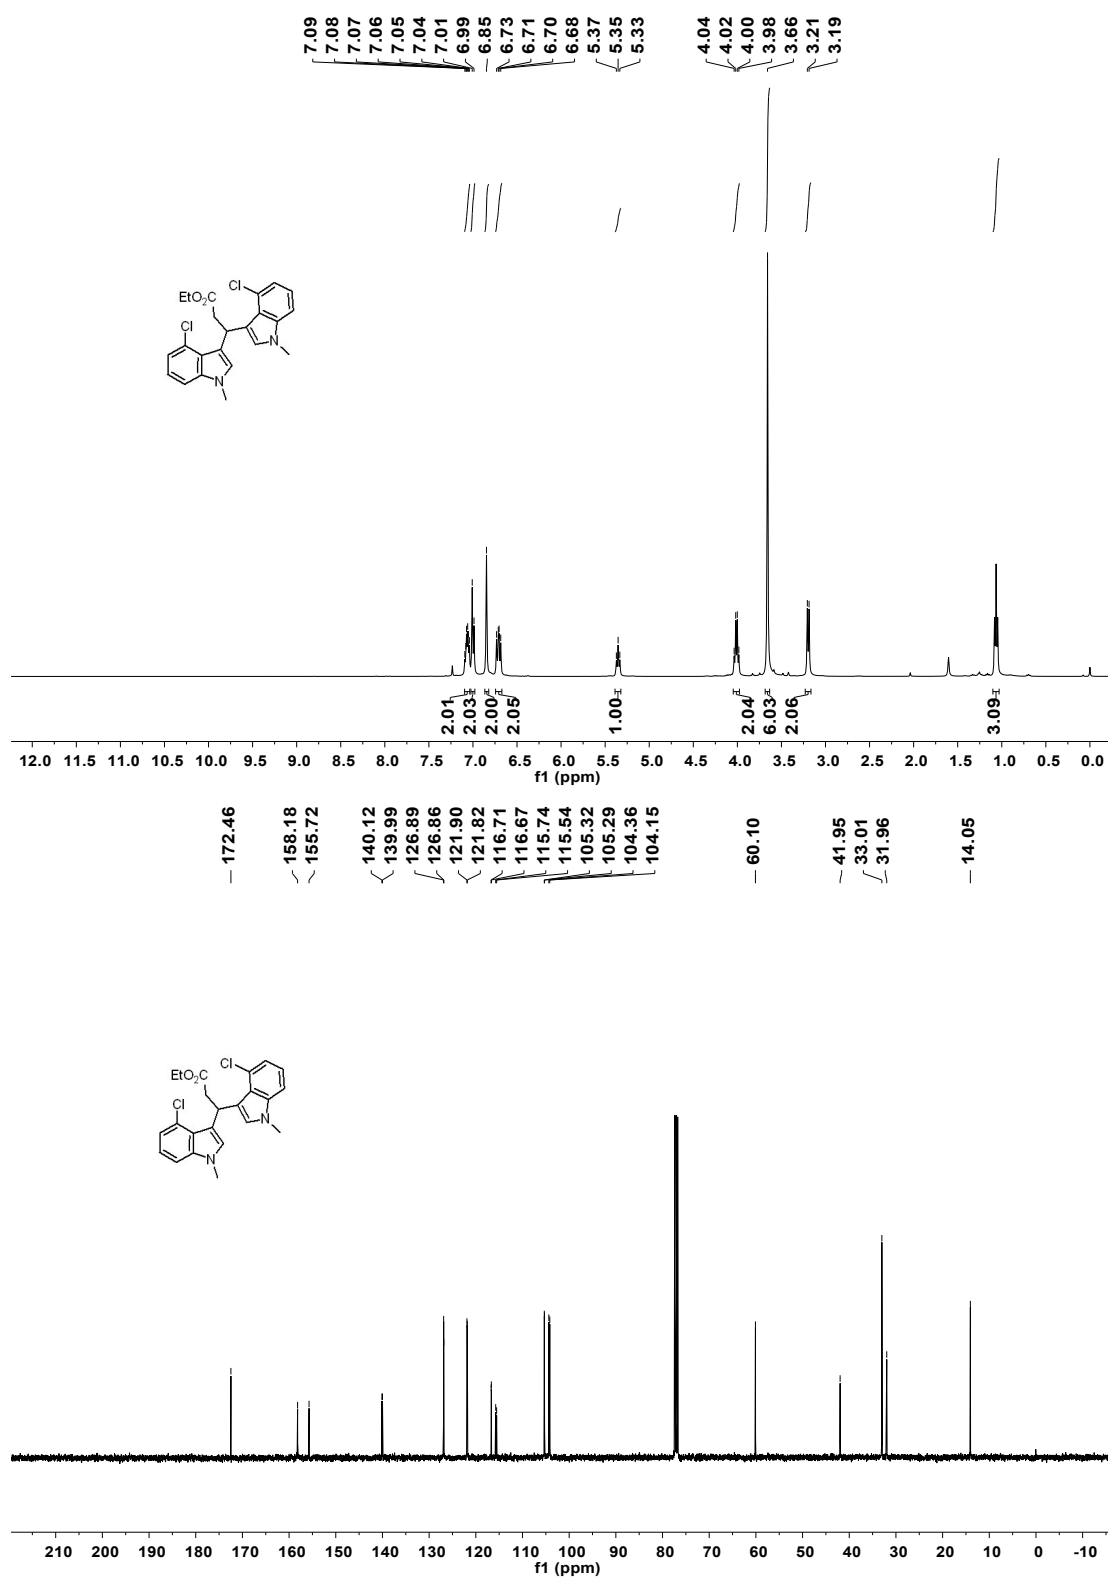



1c

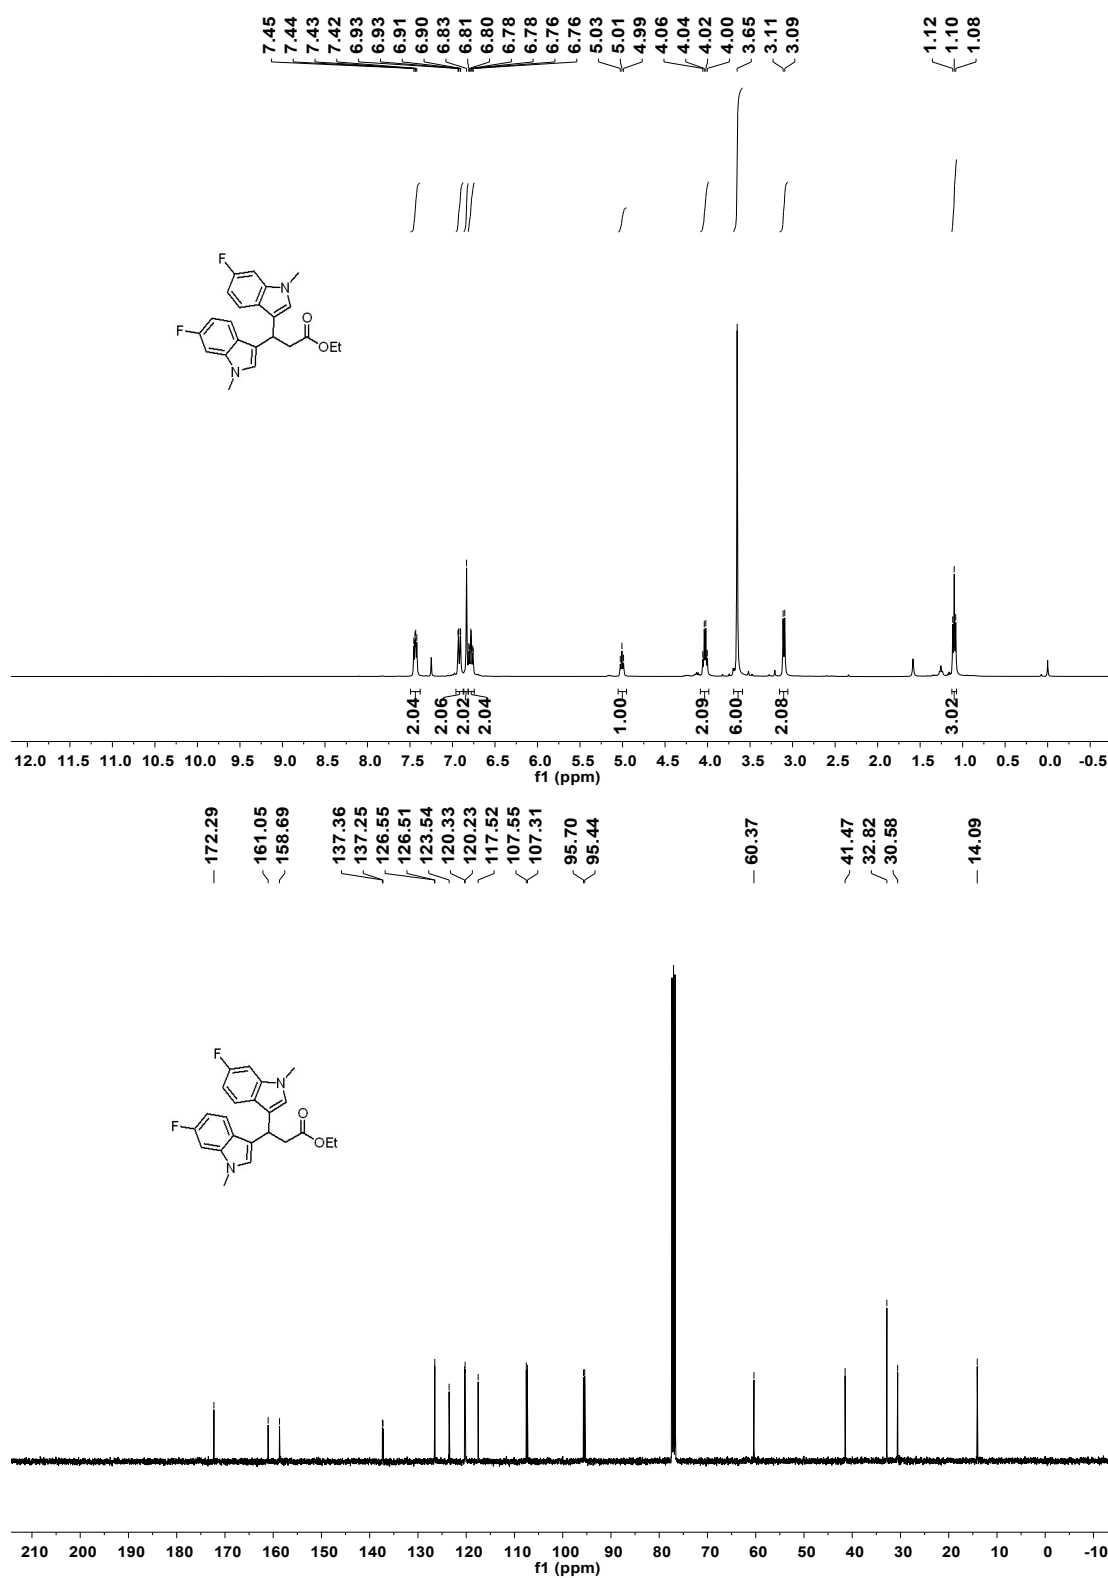

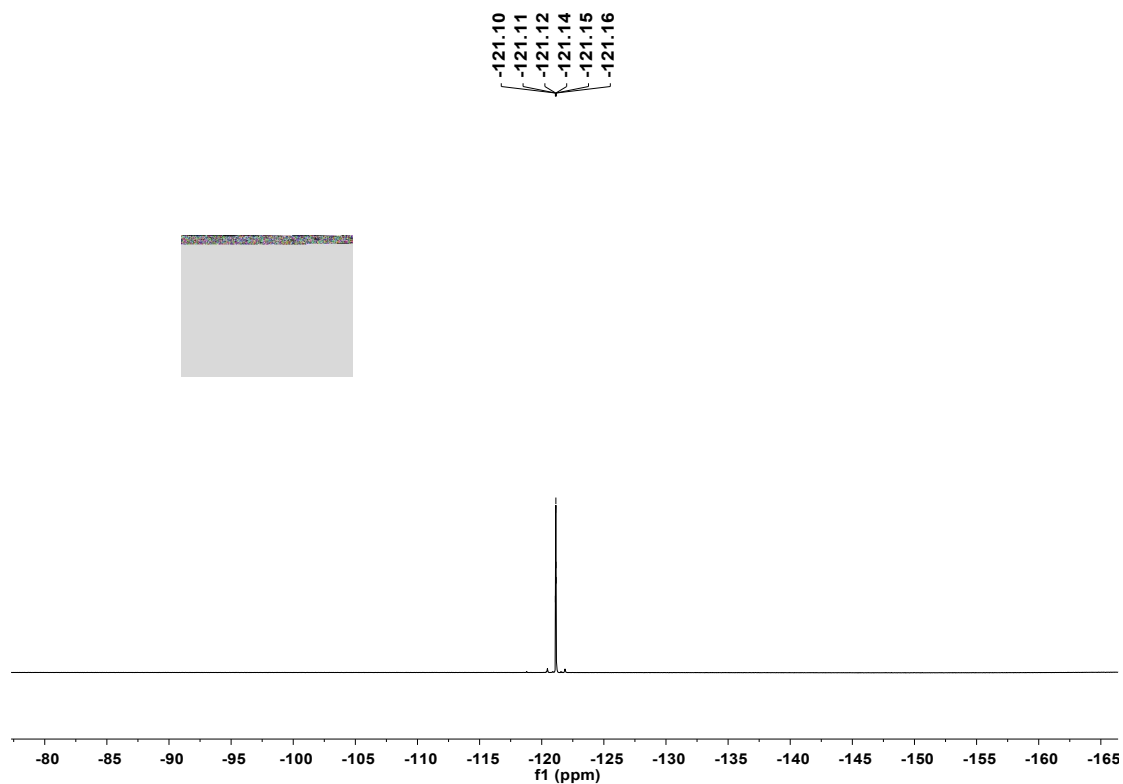

**3a**

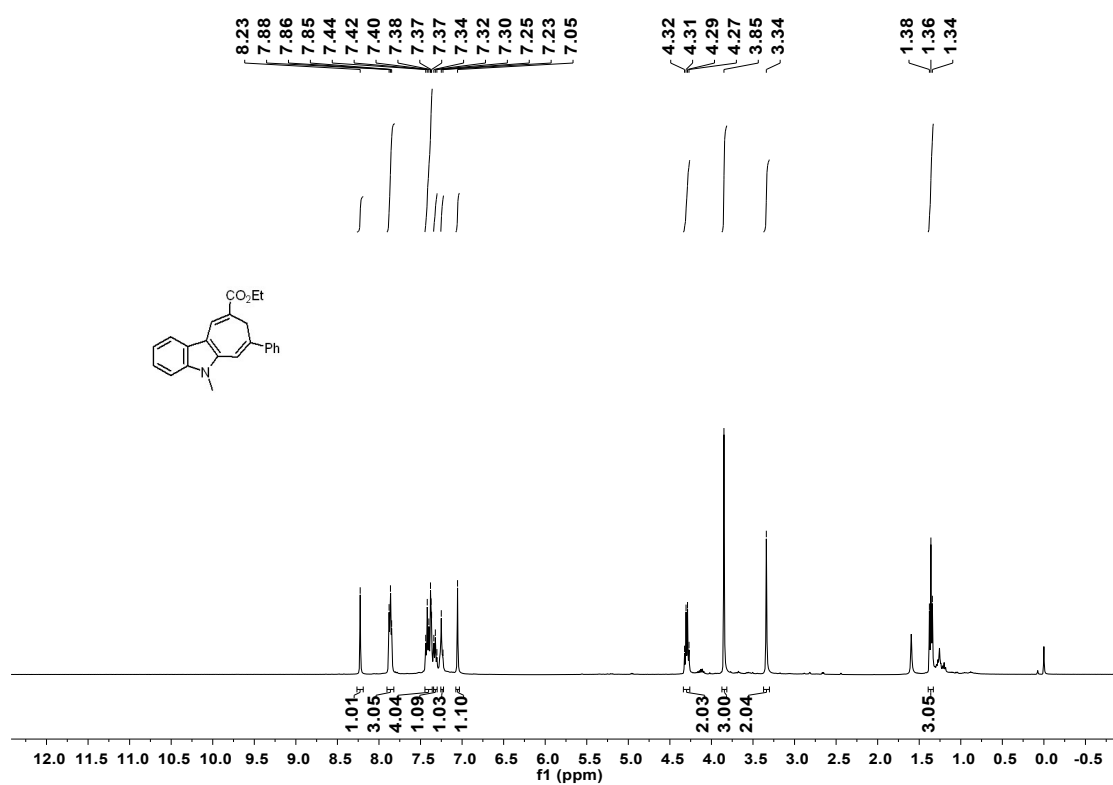

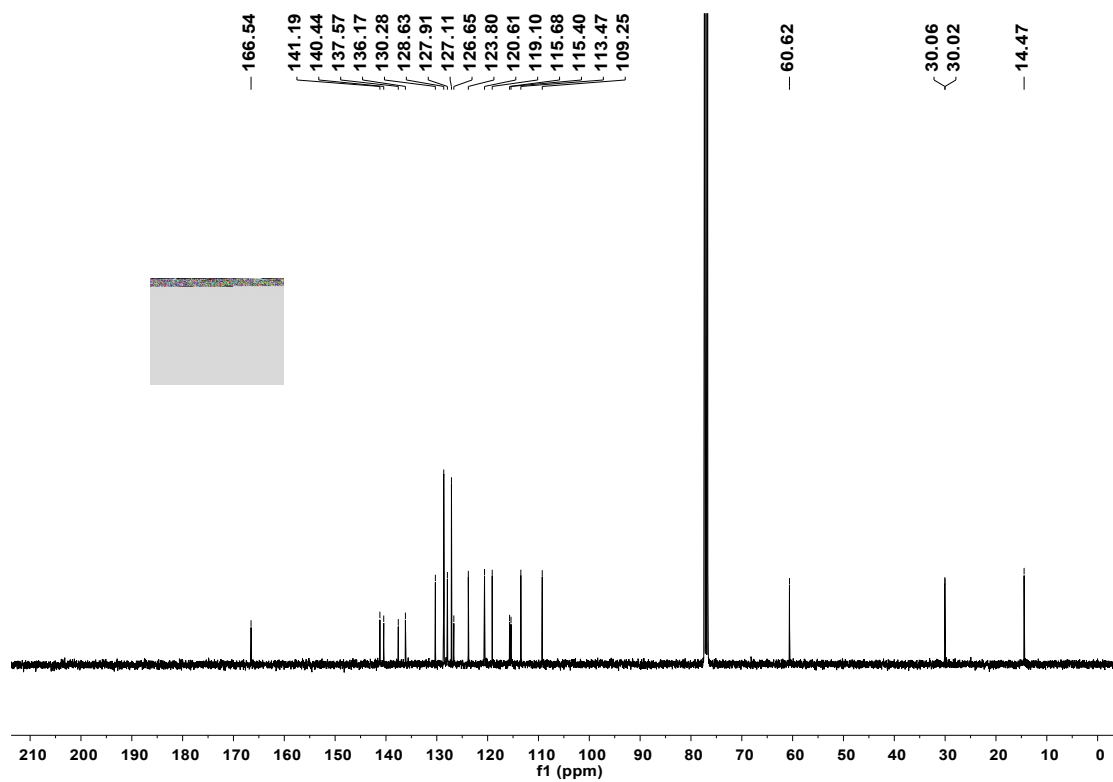

3b

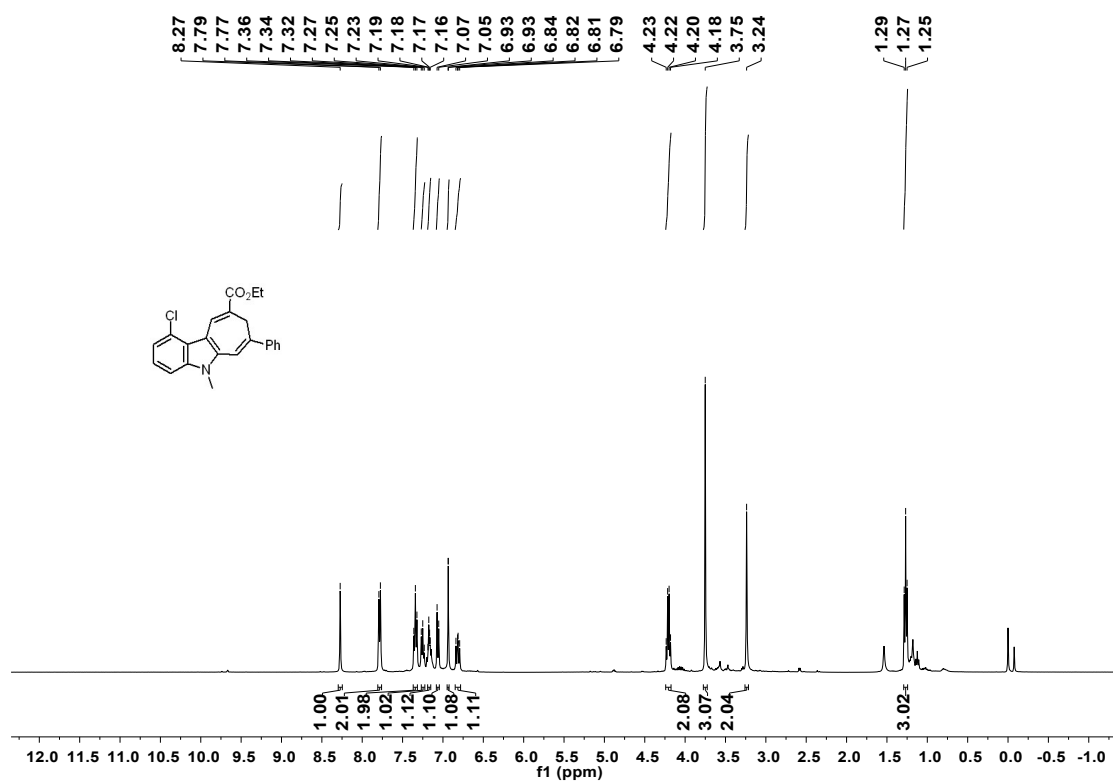

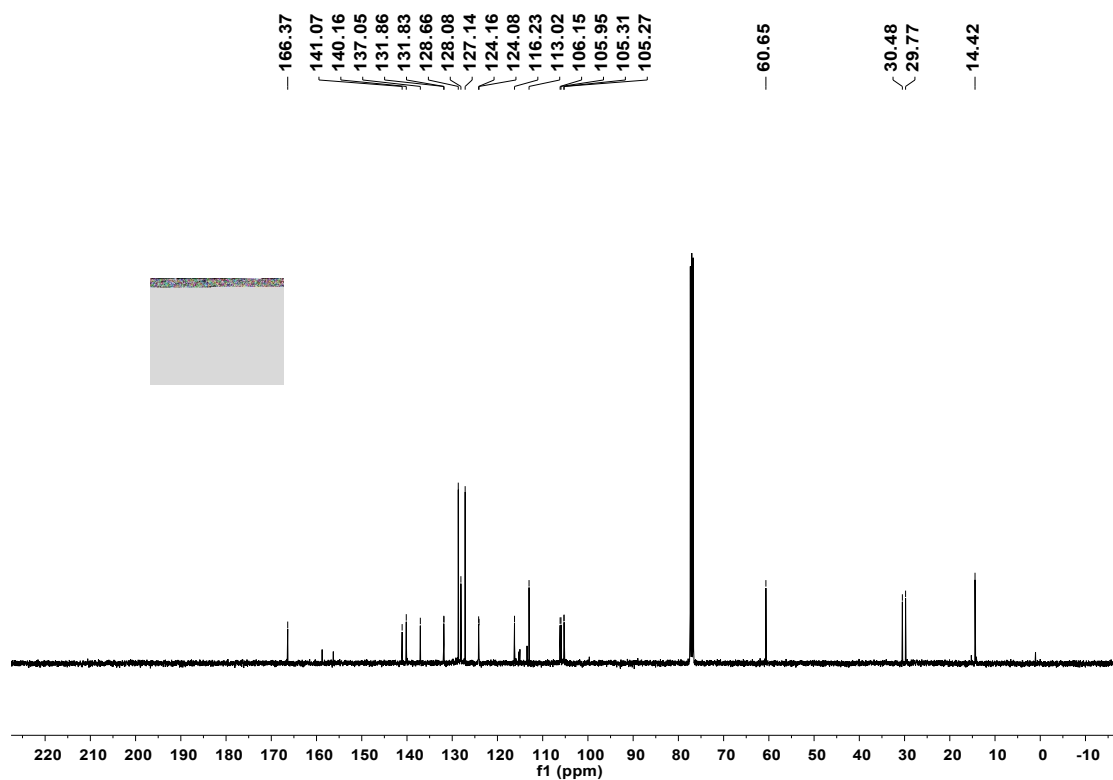

3c

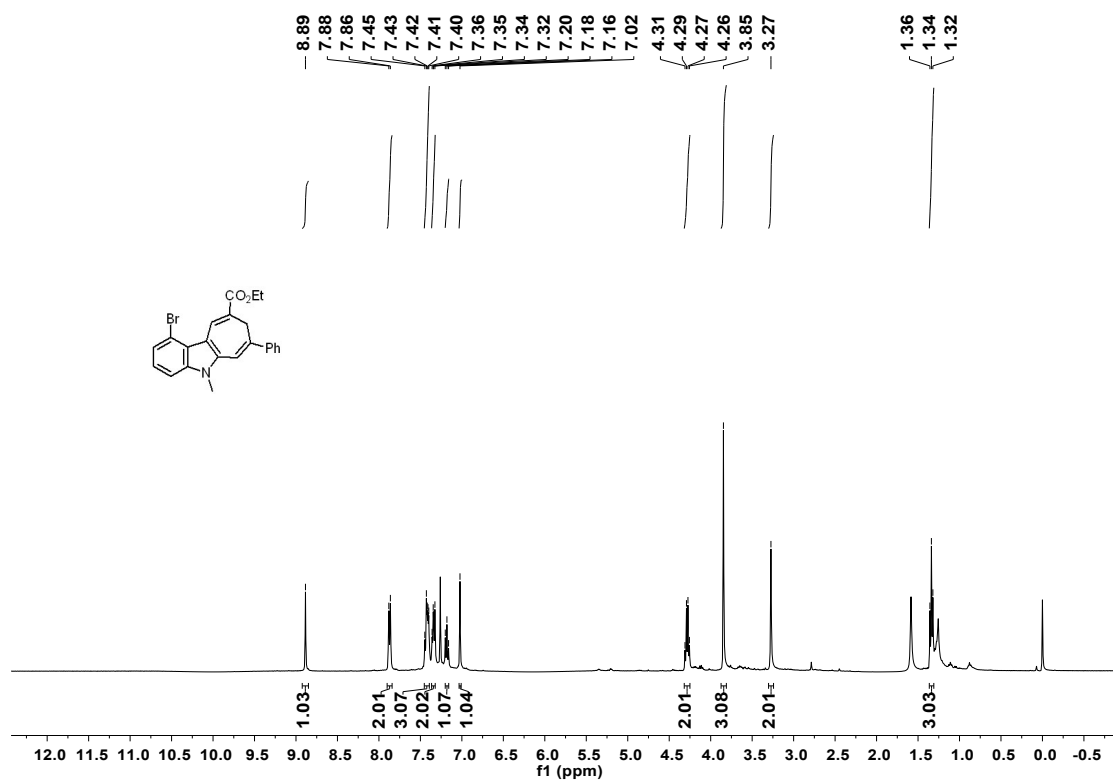

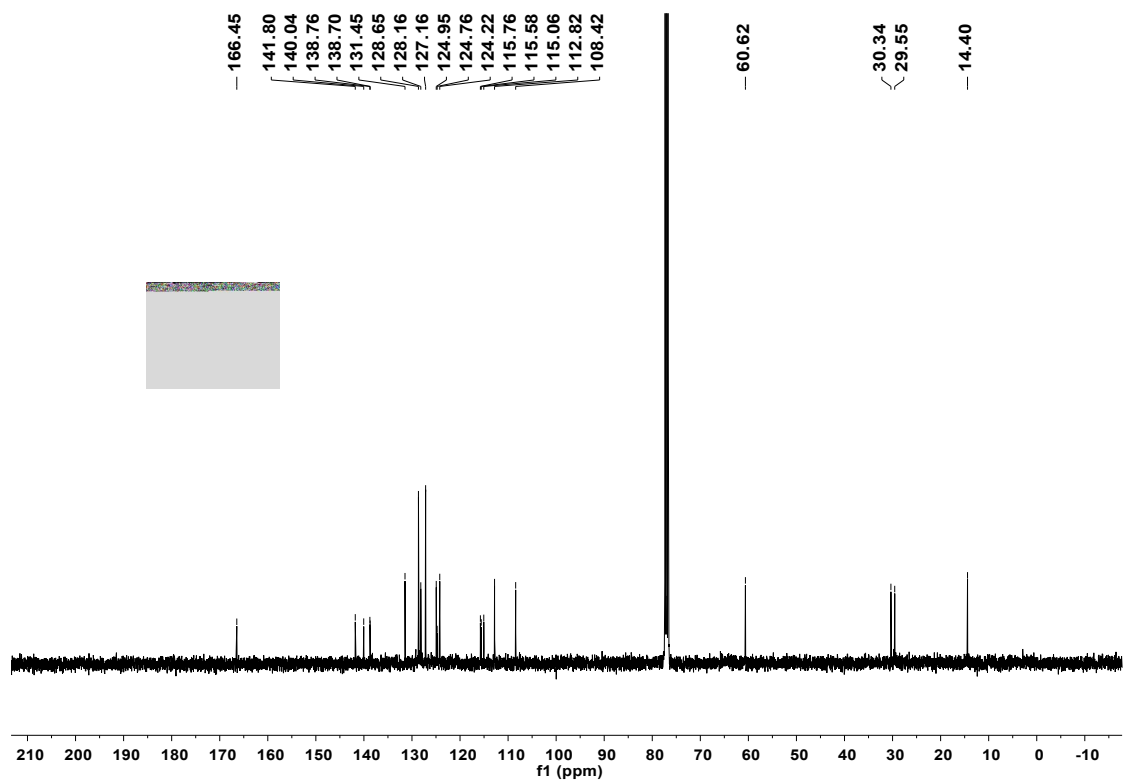

3d

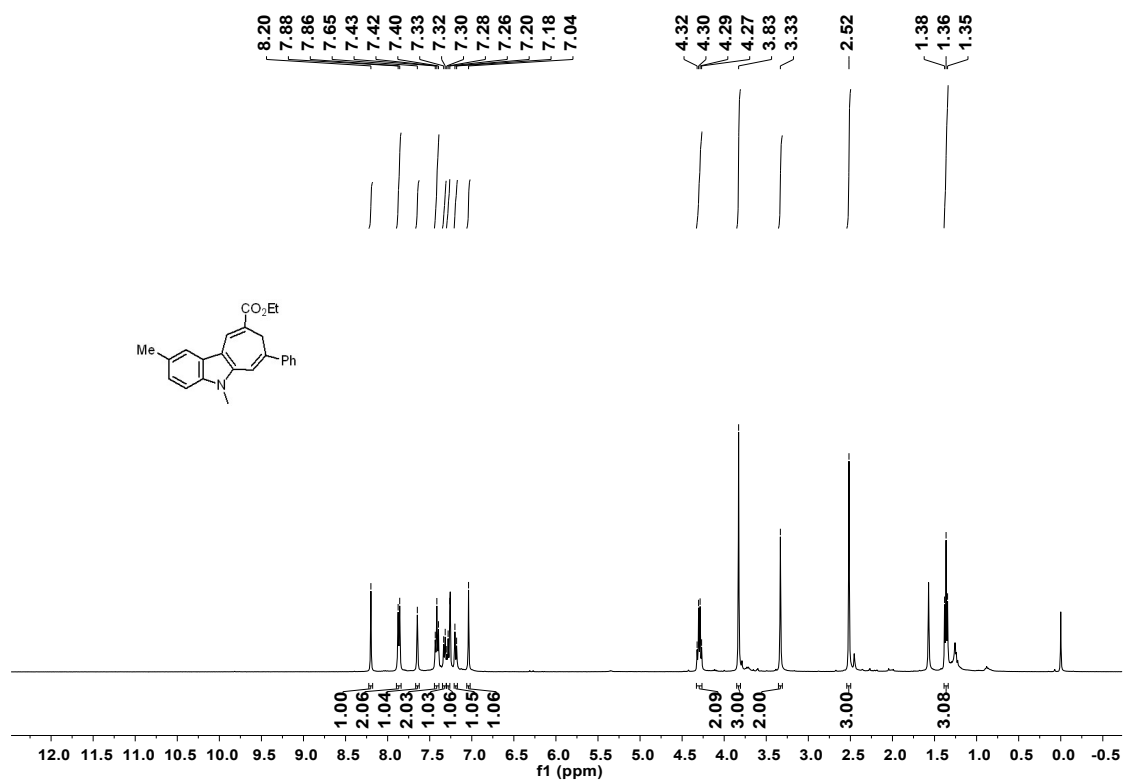

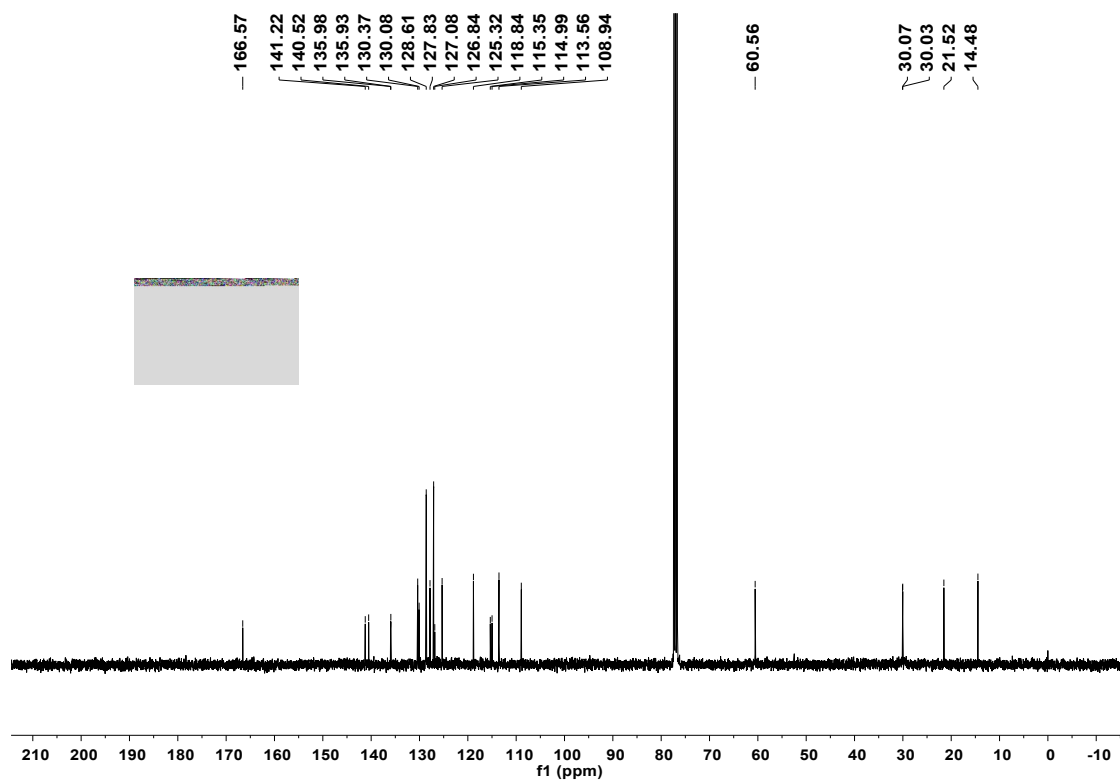

3e

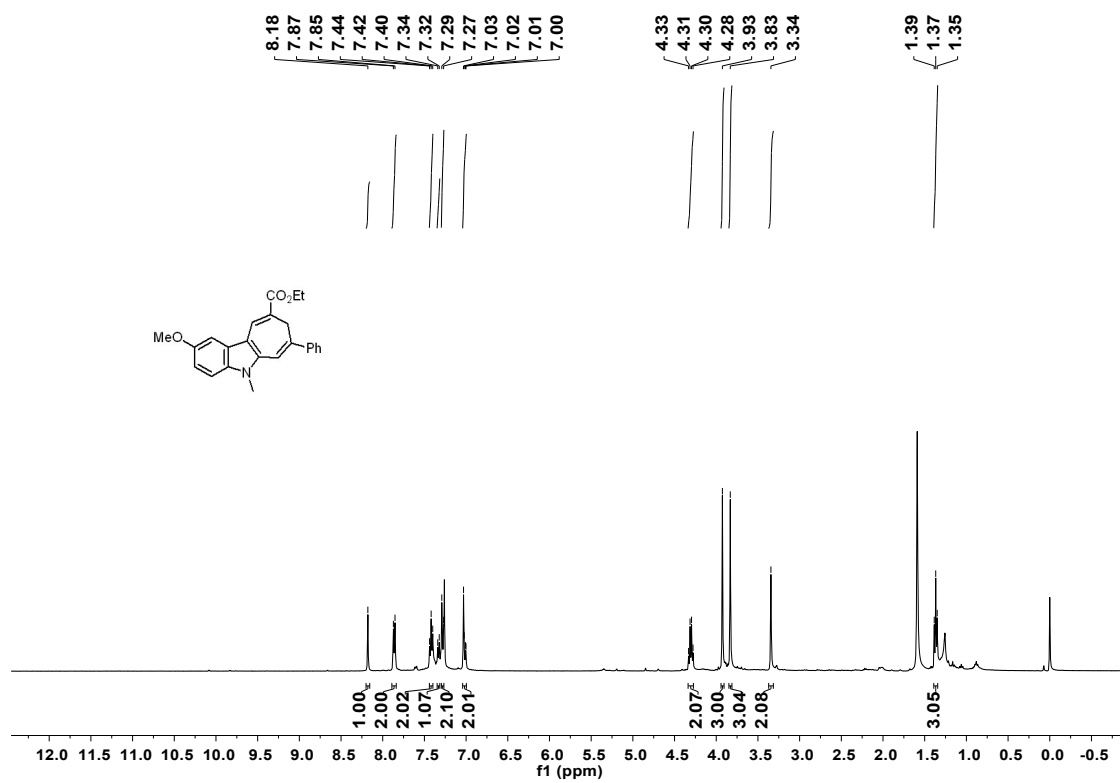

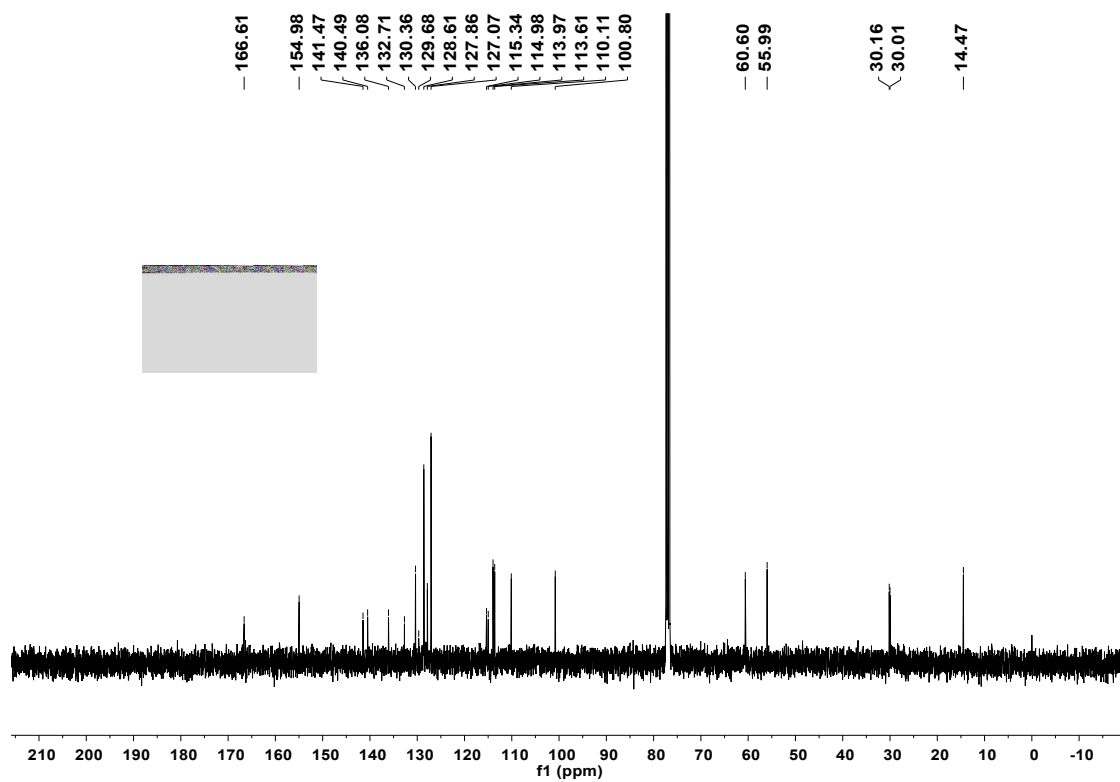

3f

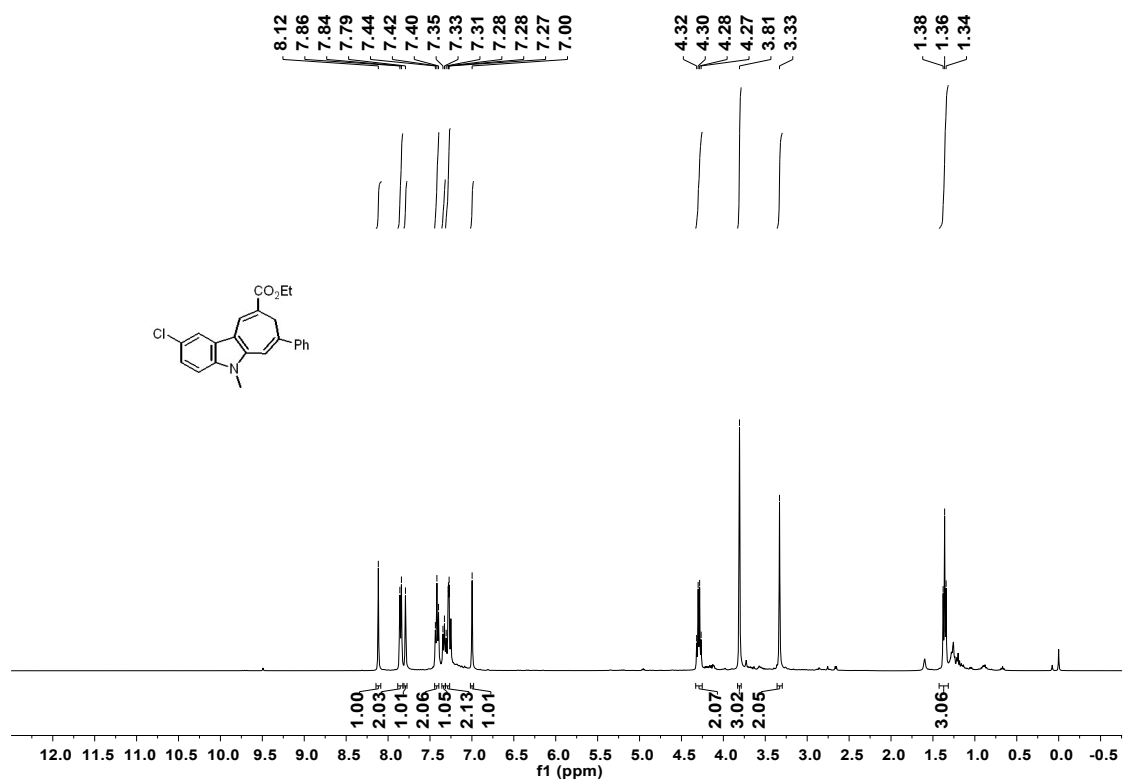

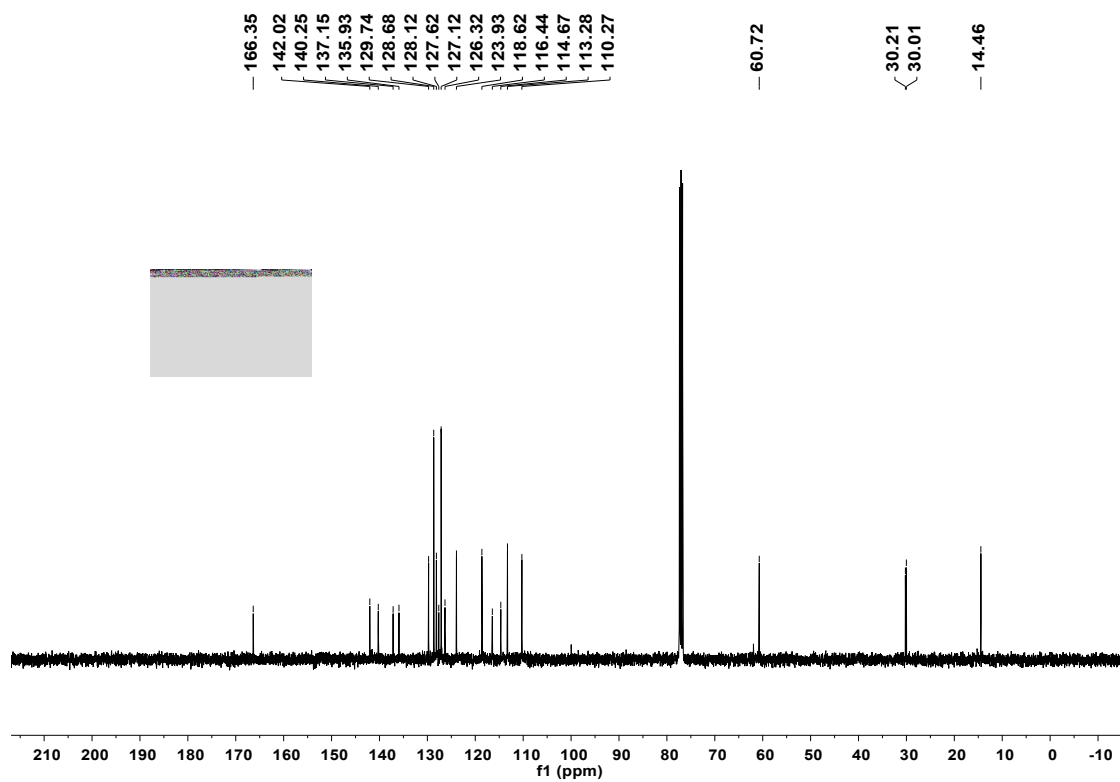

3g

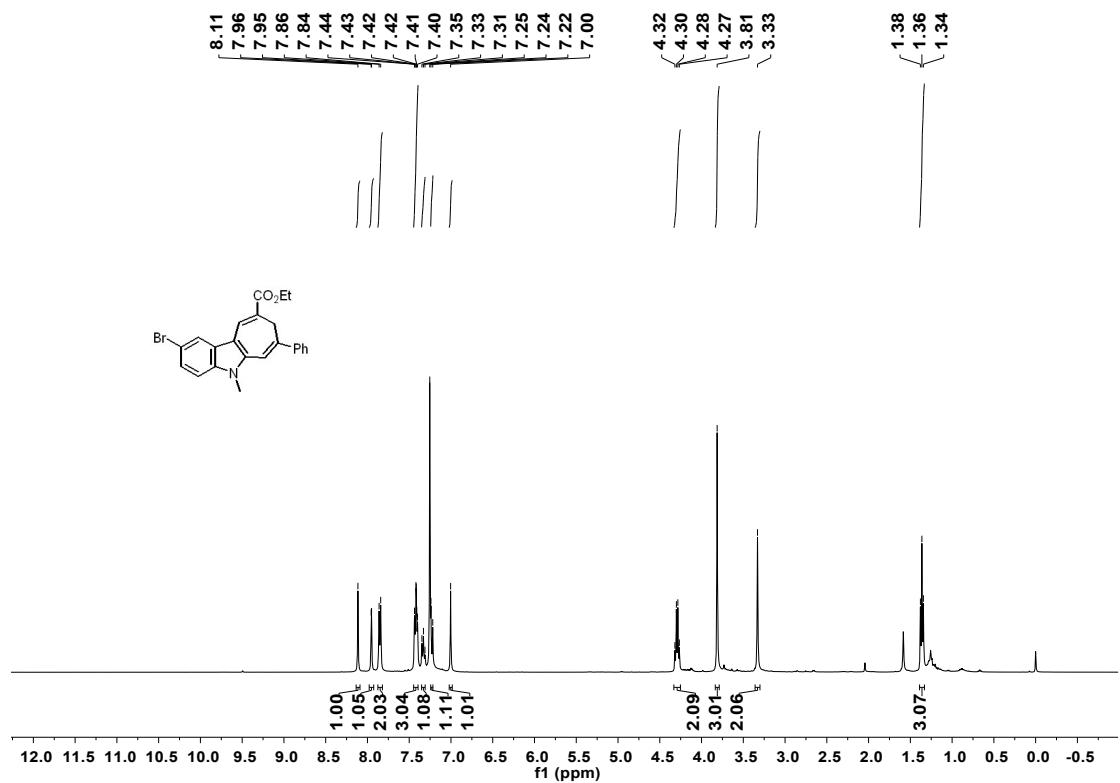



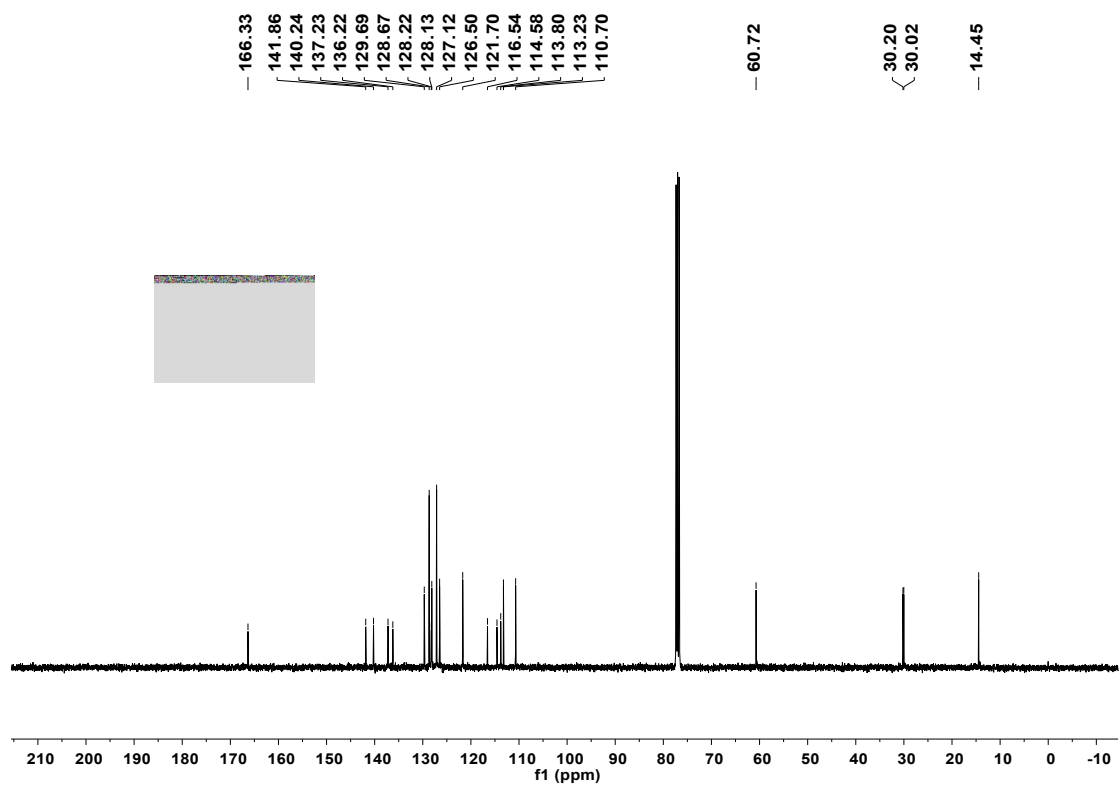

3h

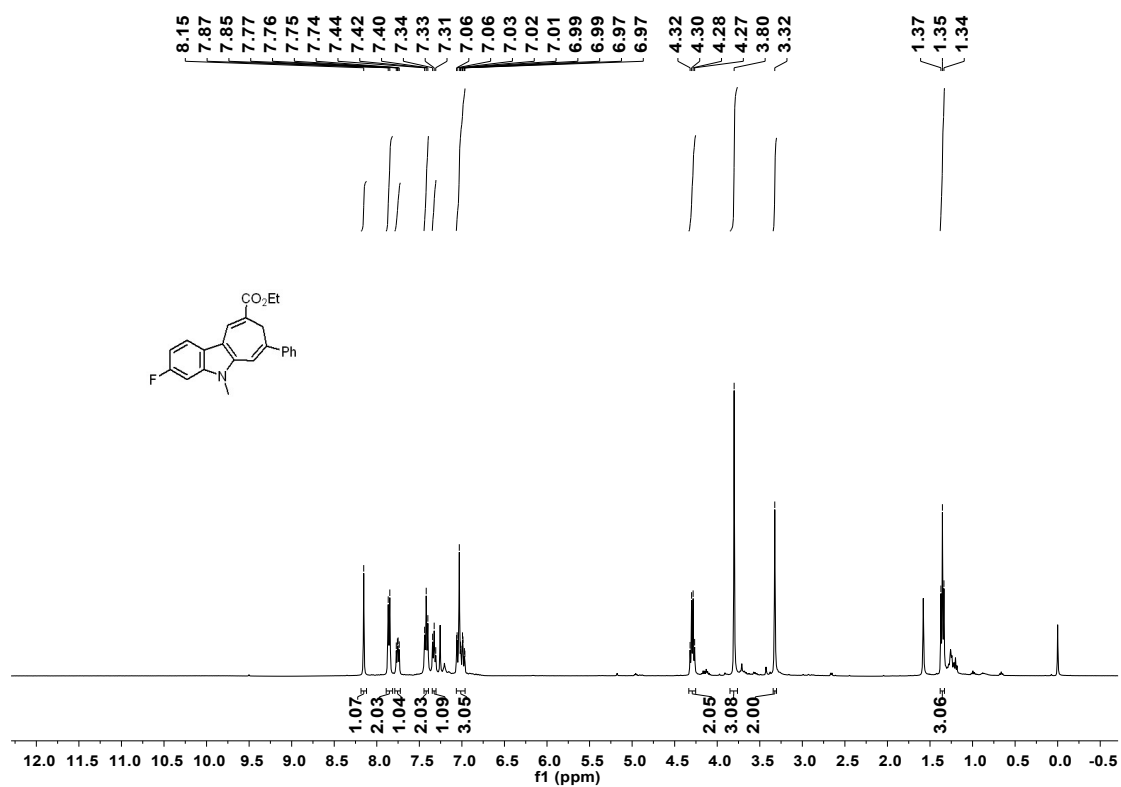

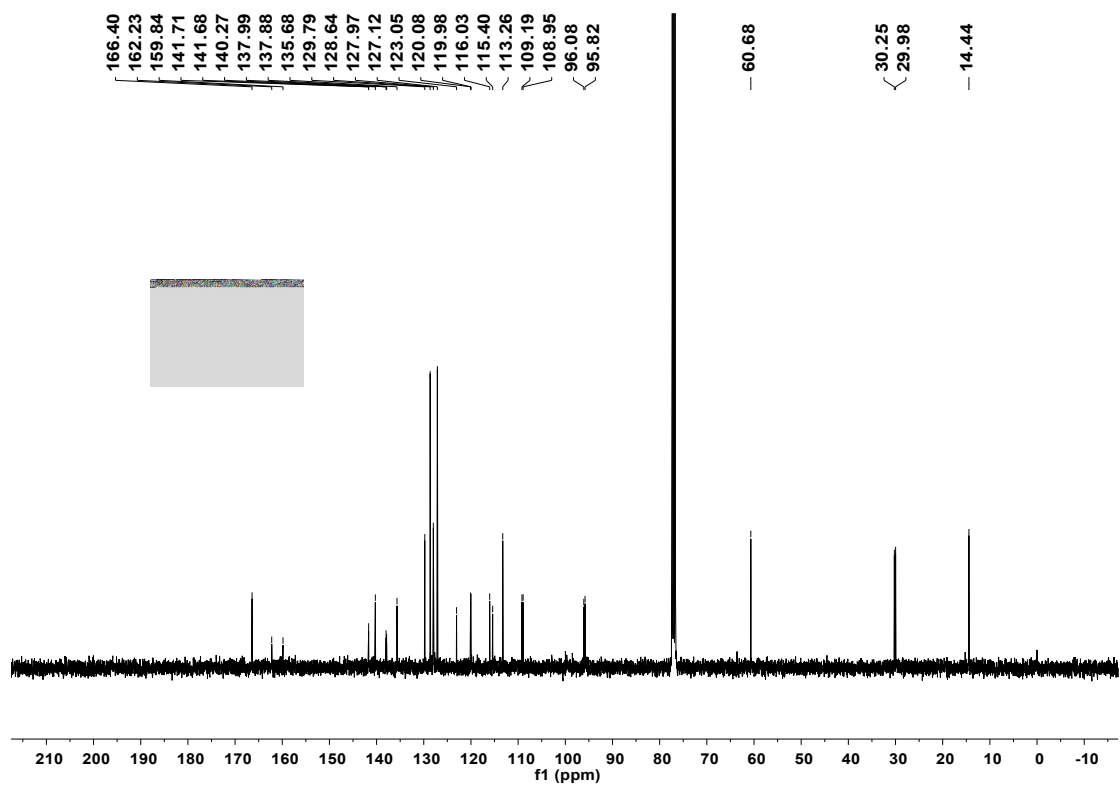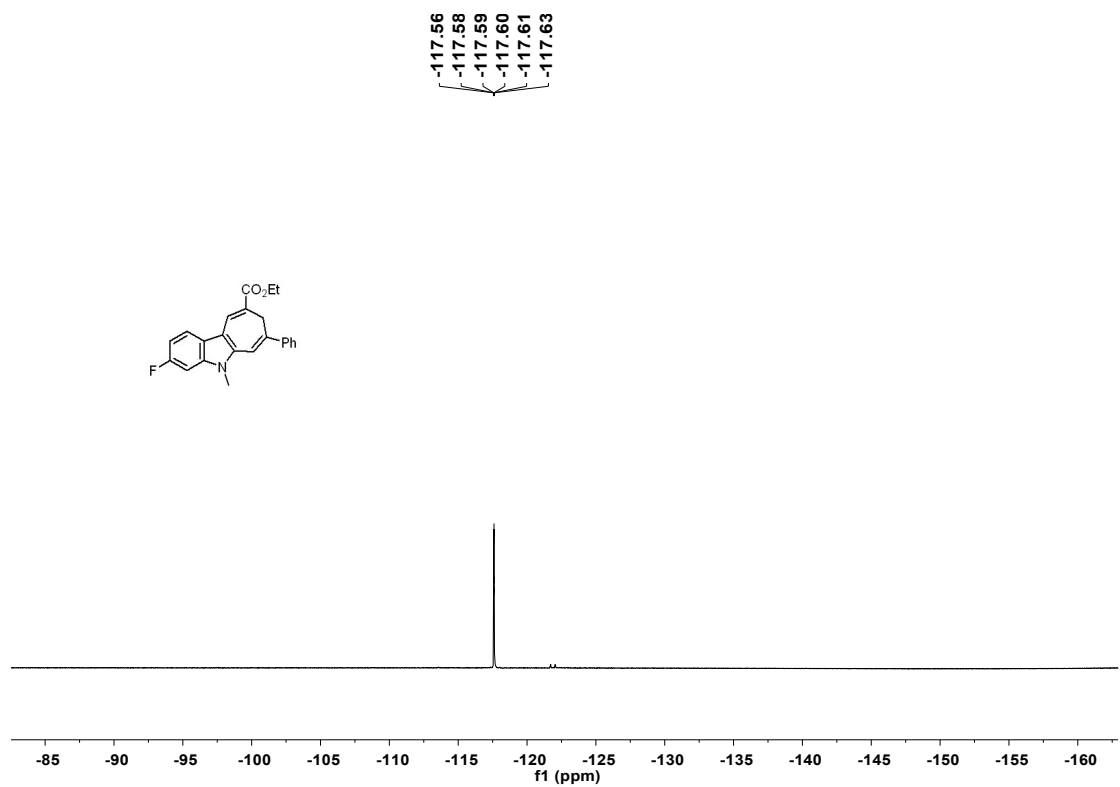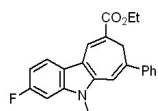

3i

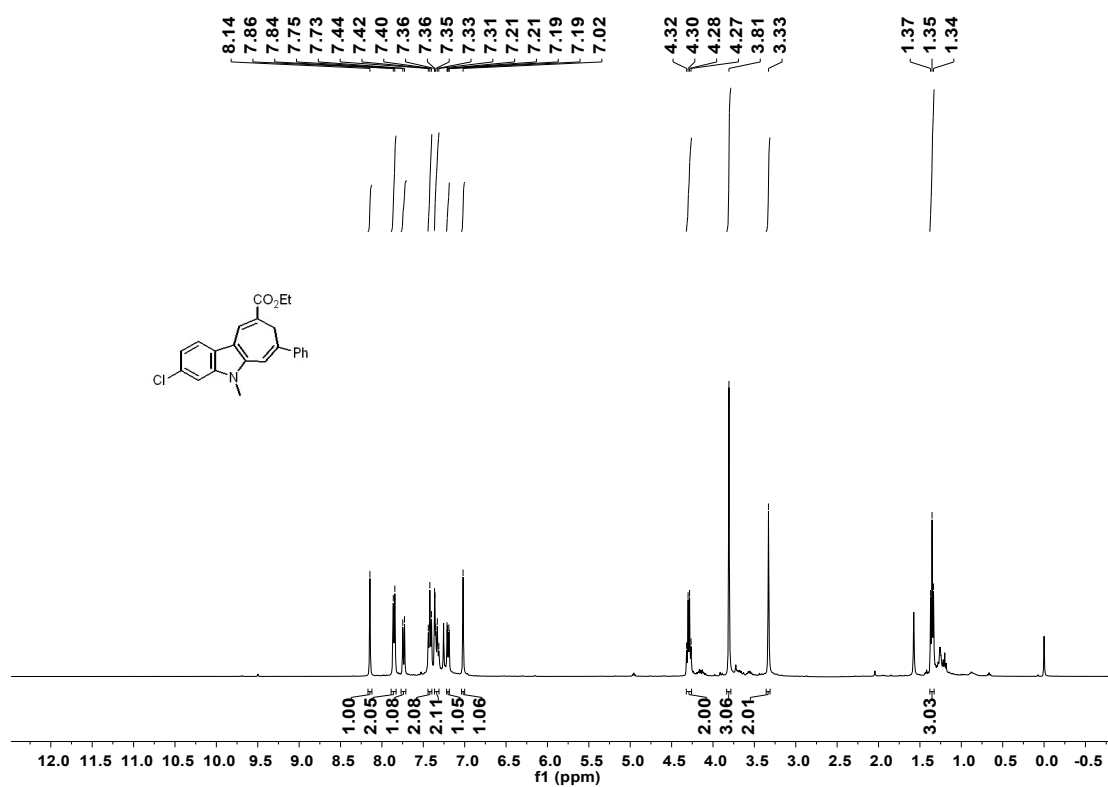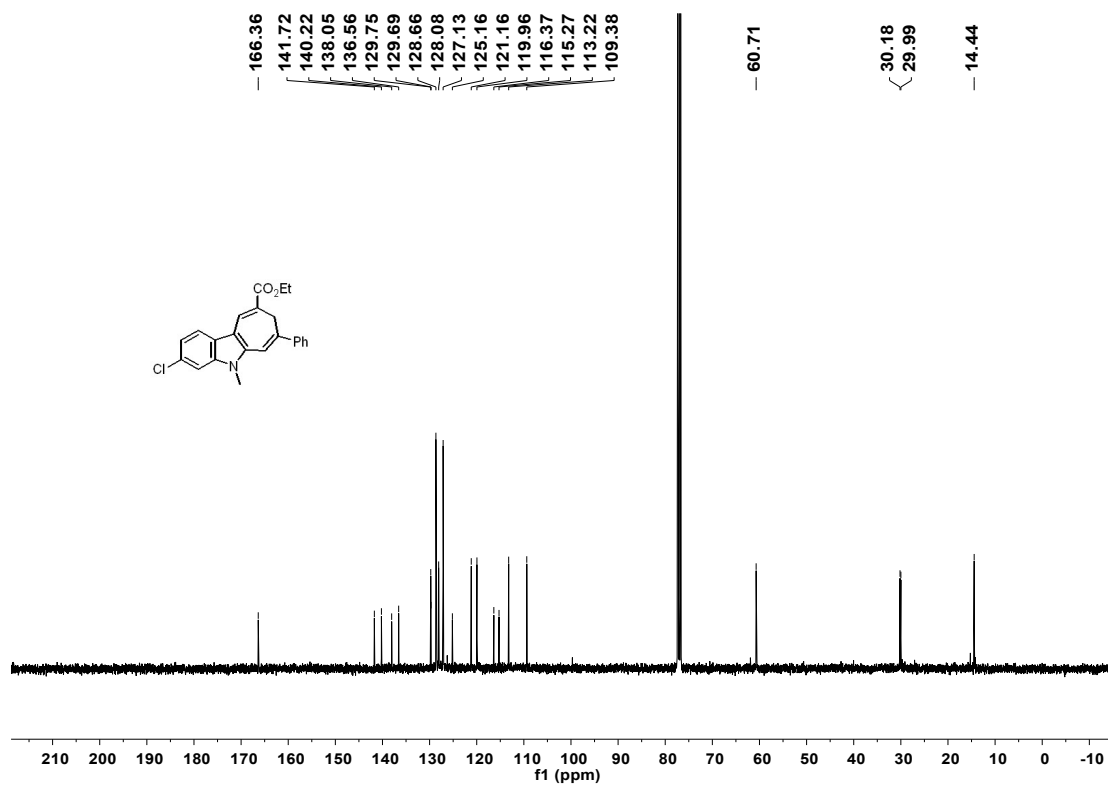

3j

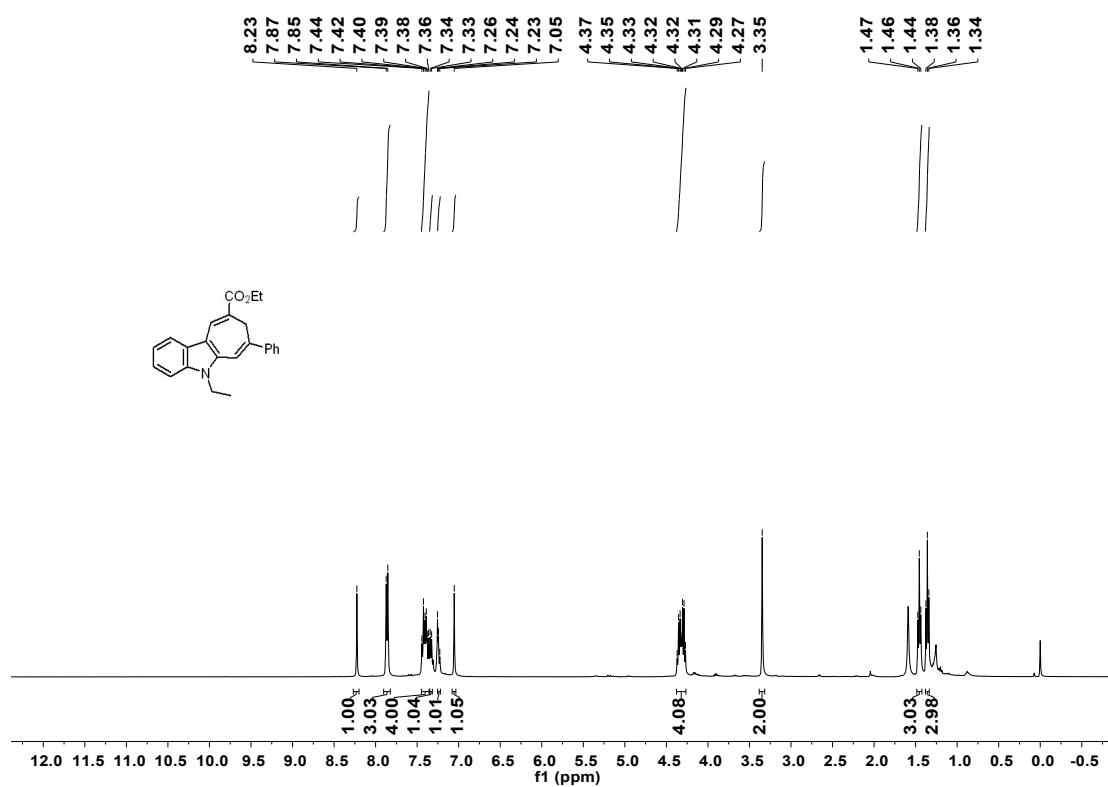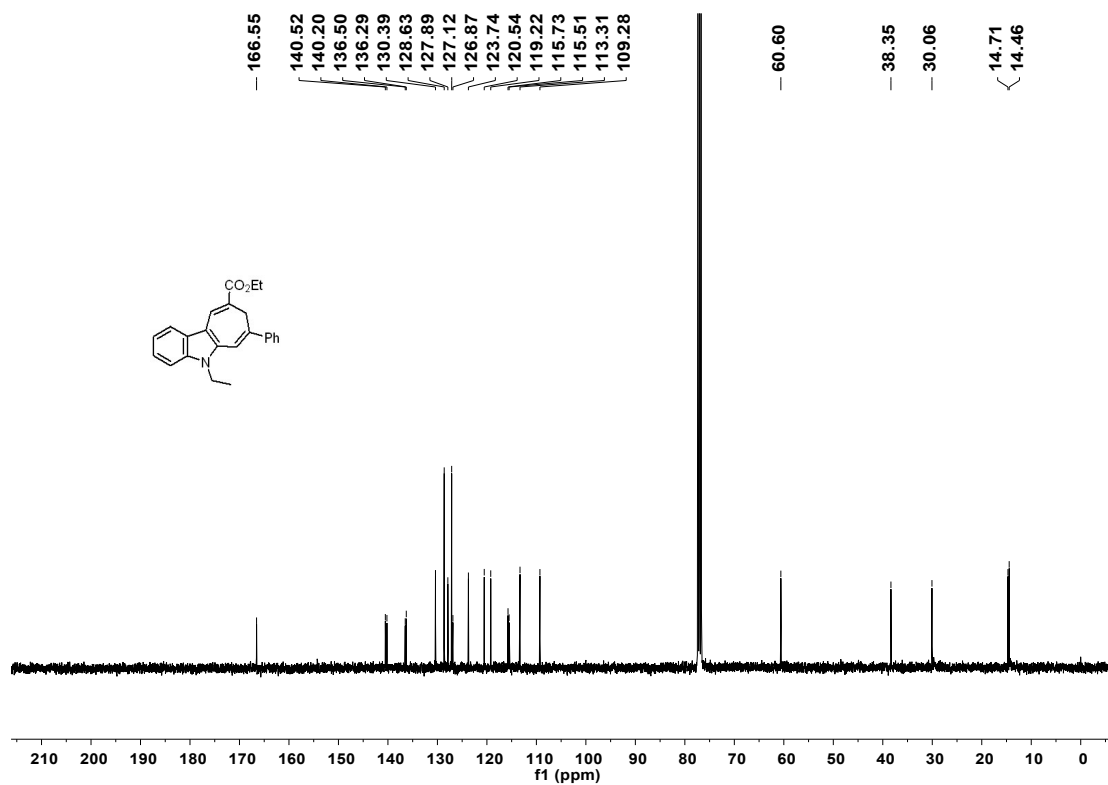

3k

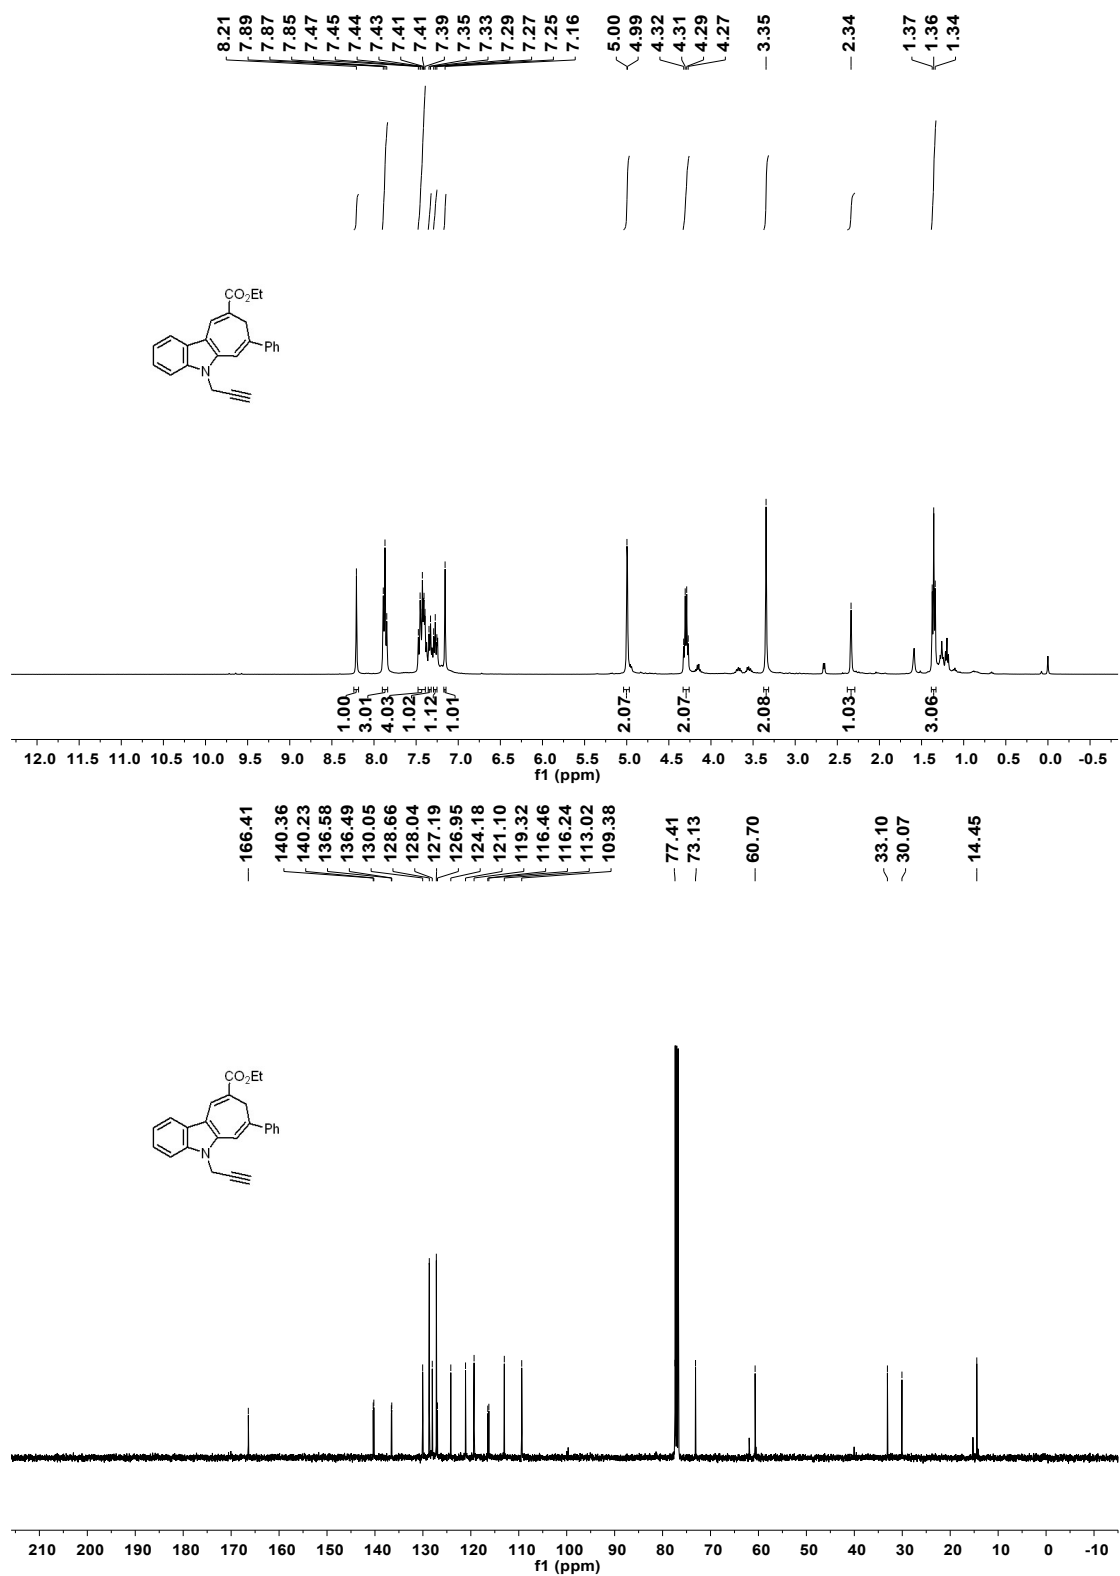

31

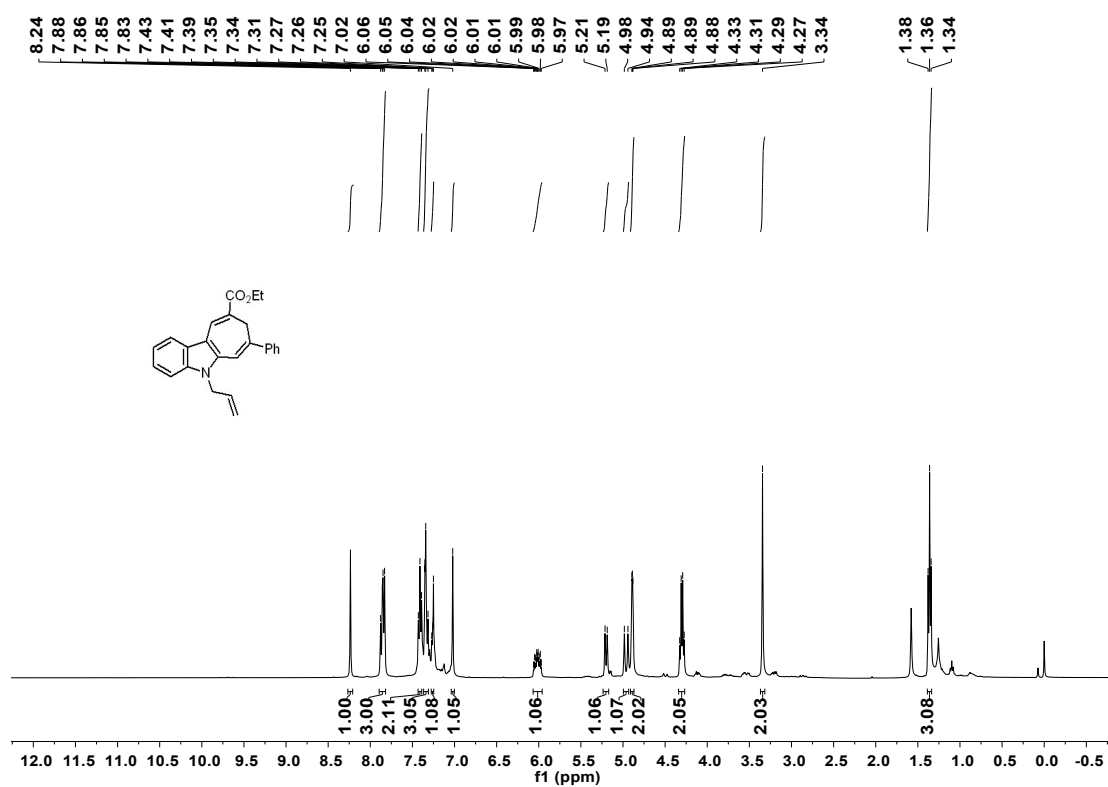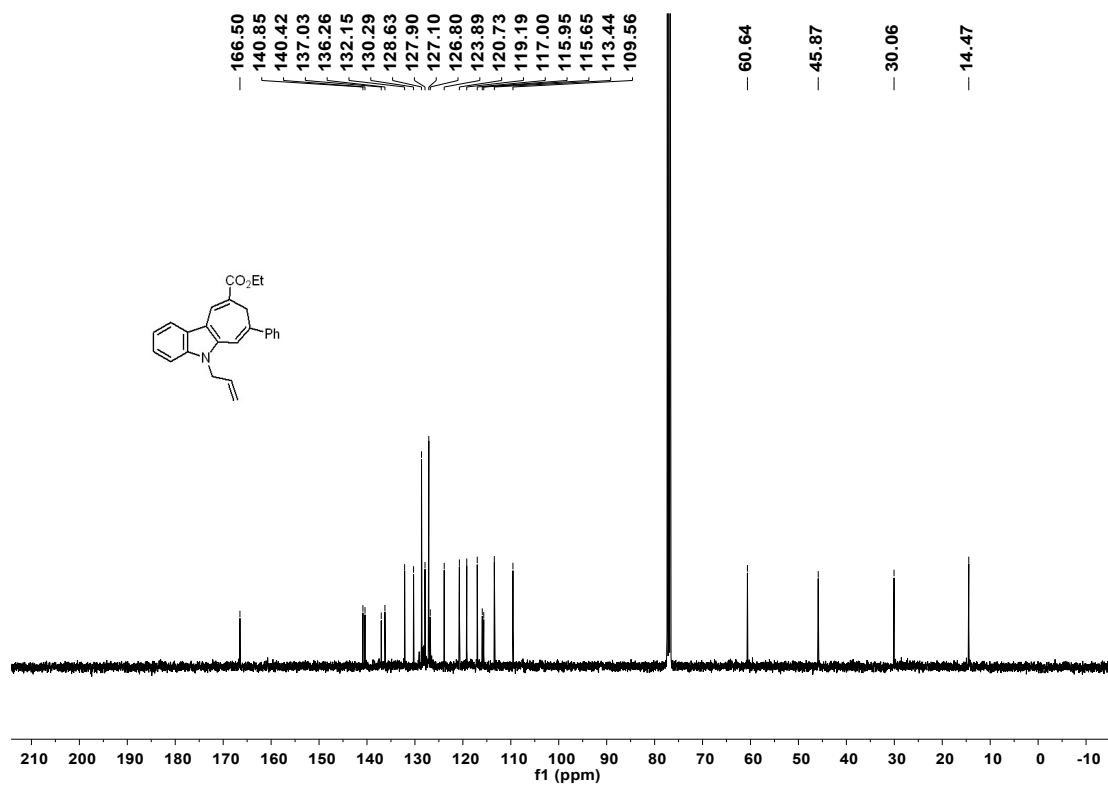

3m

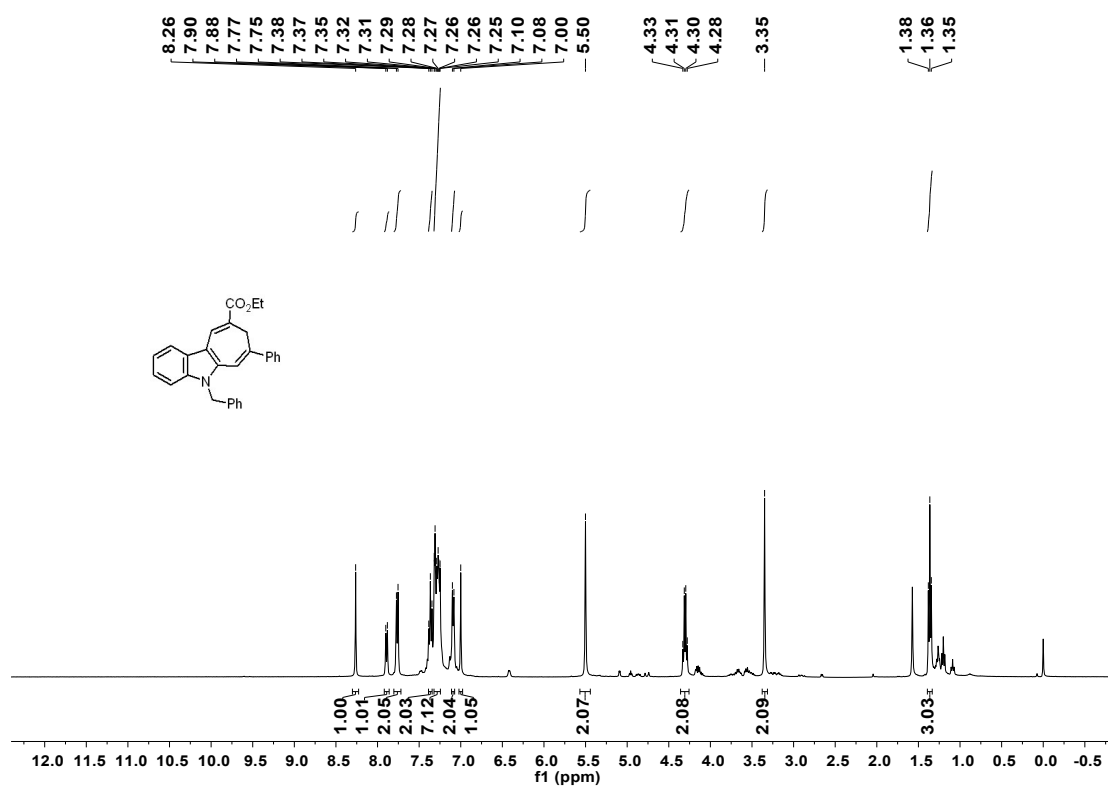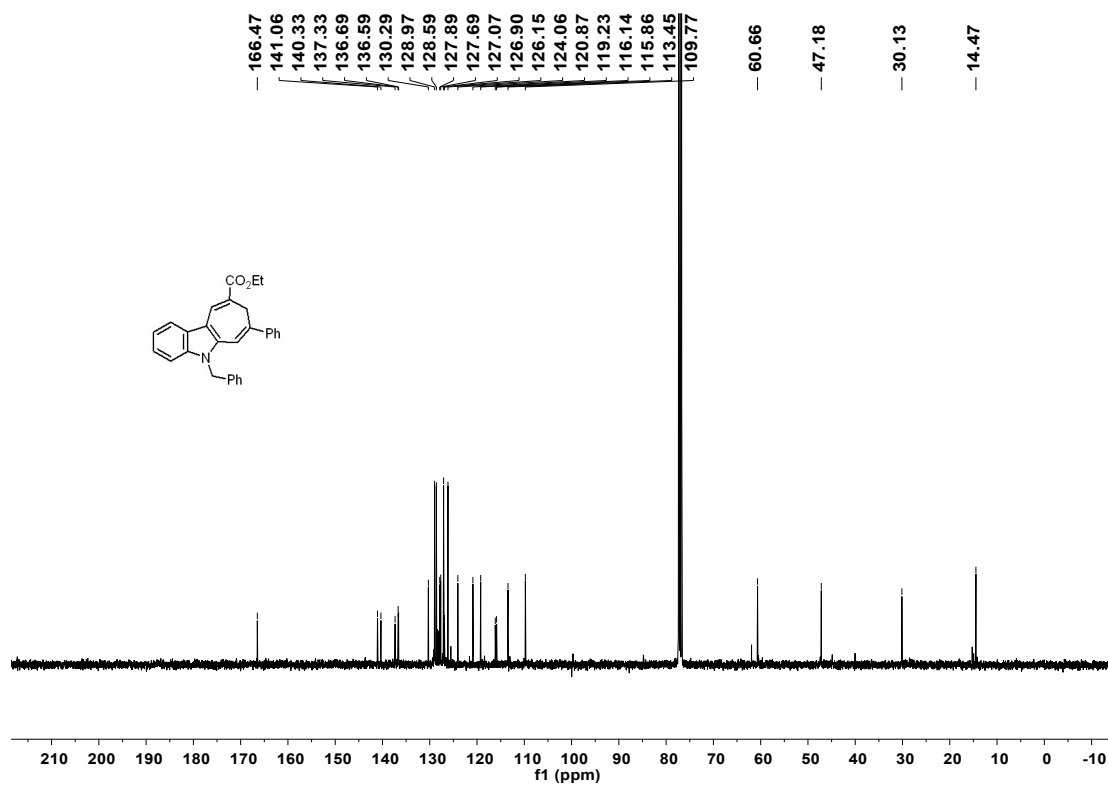

3n

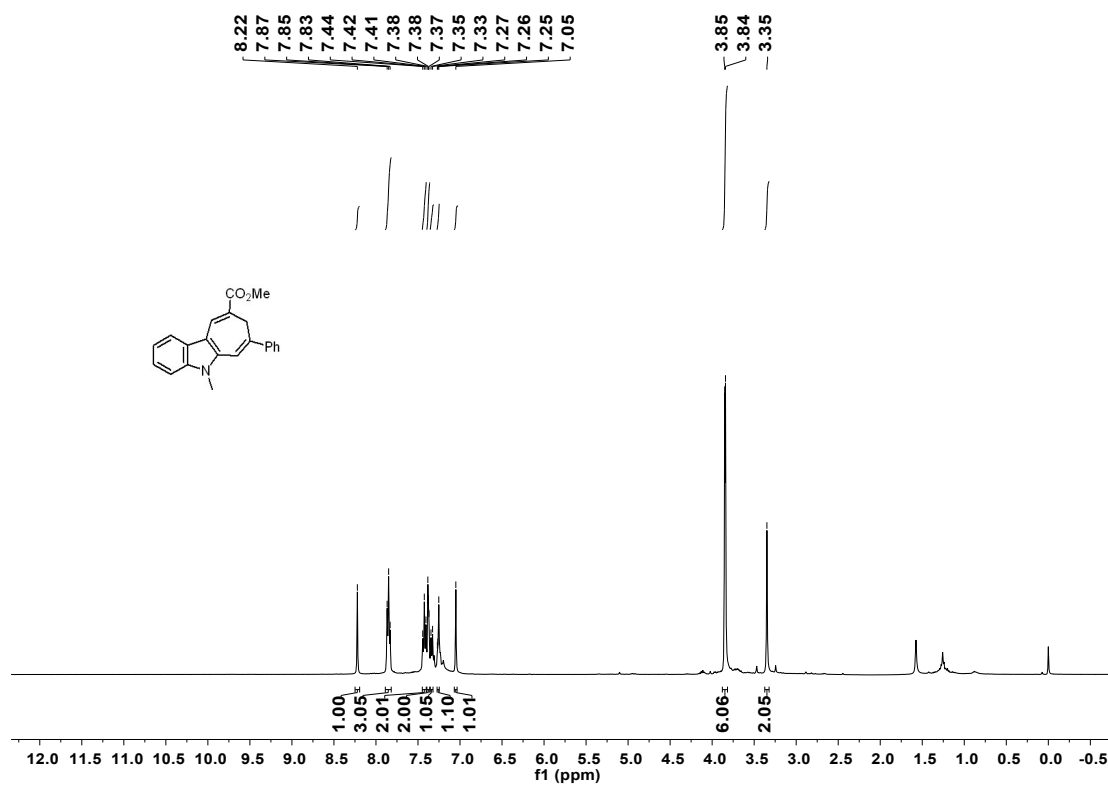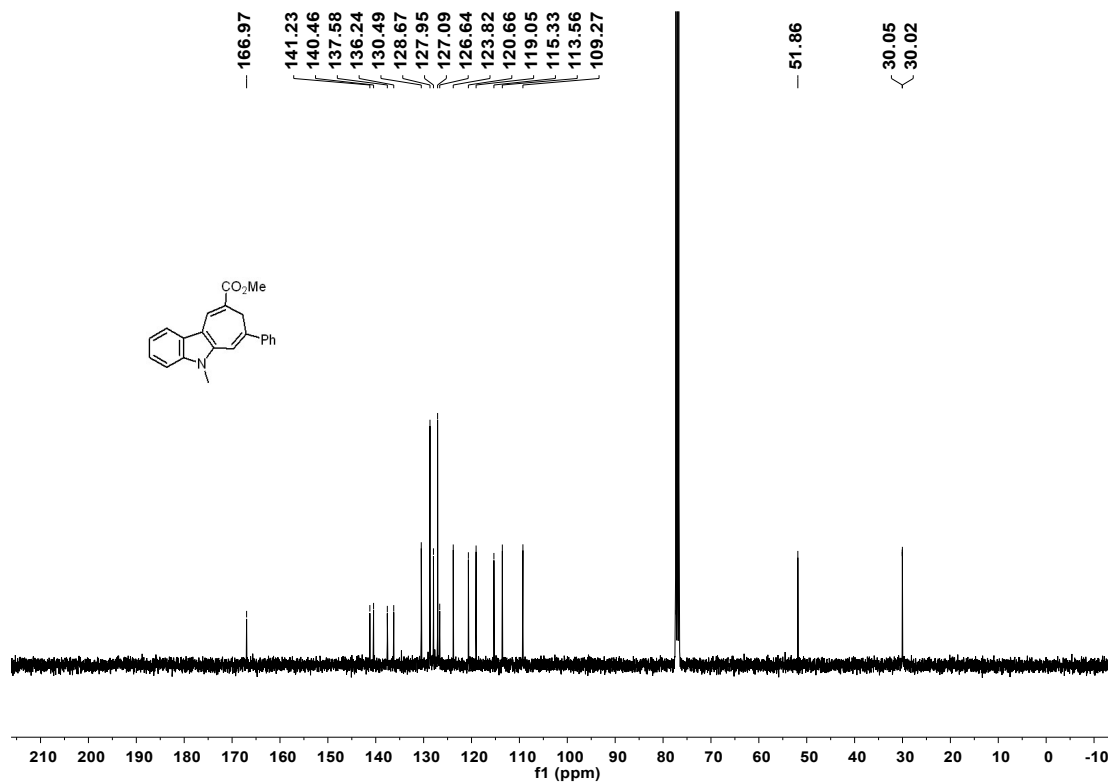



3o

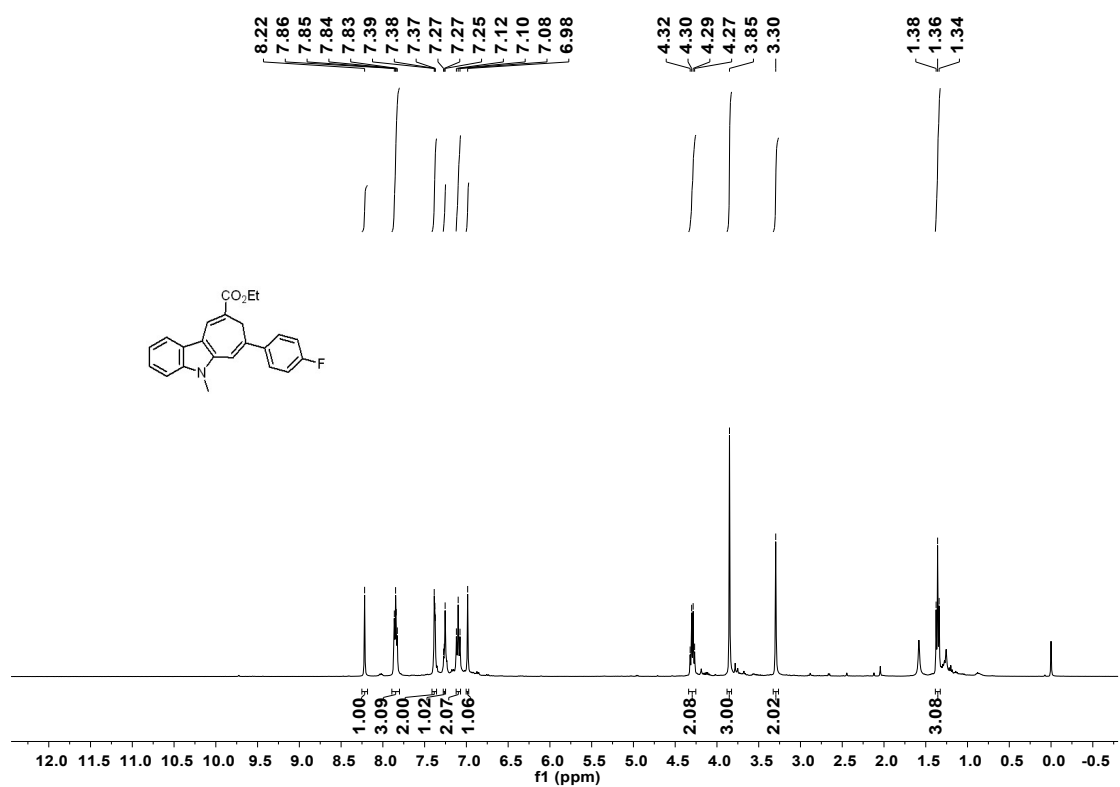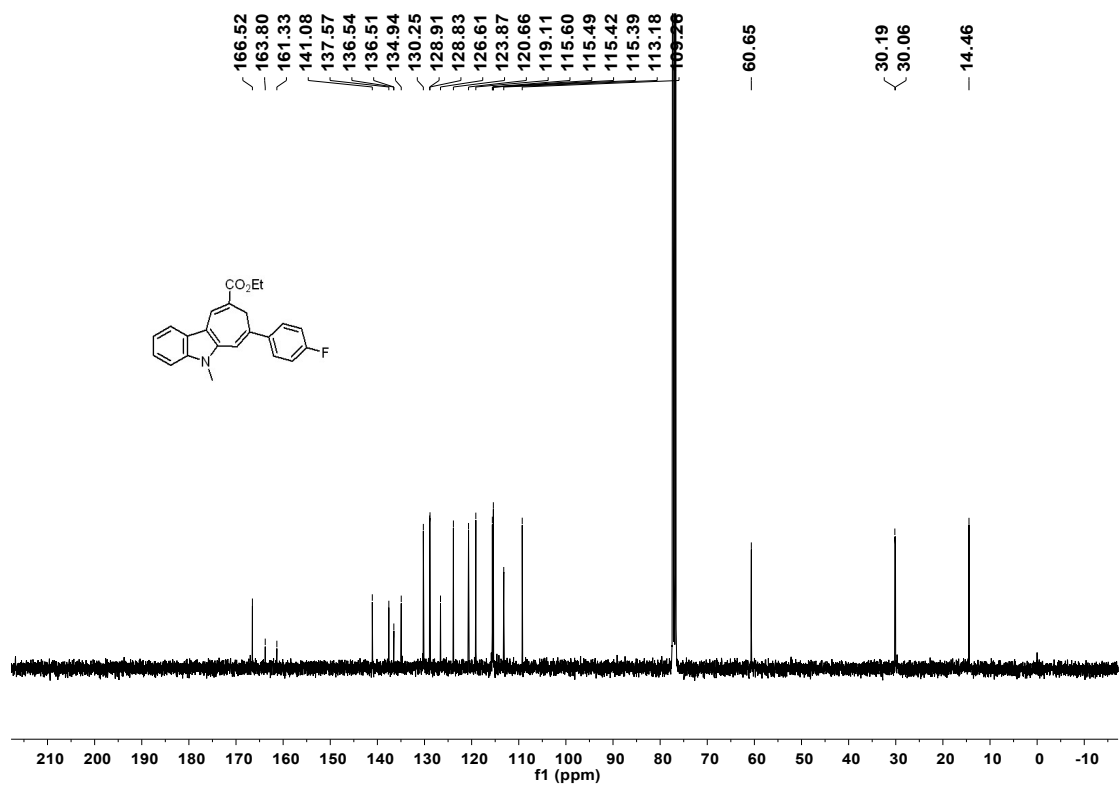

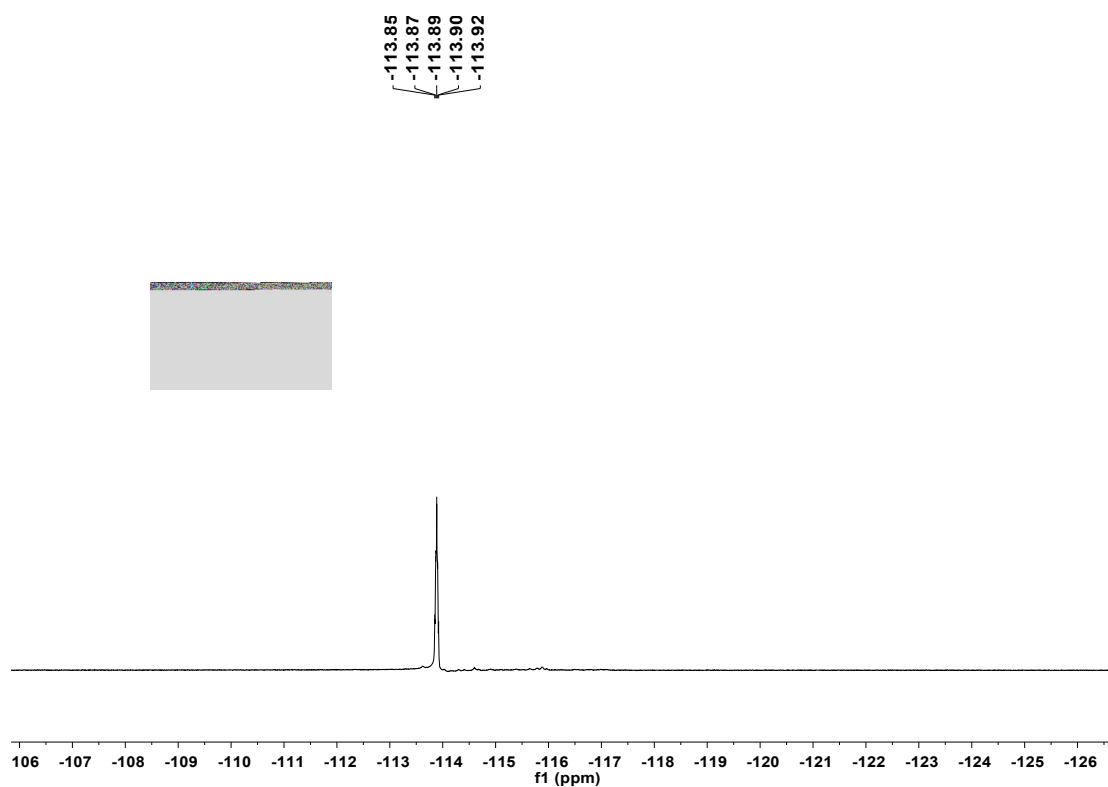

3p

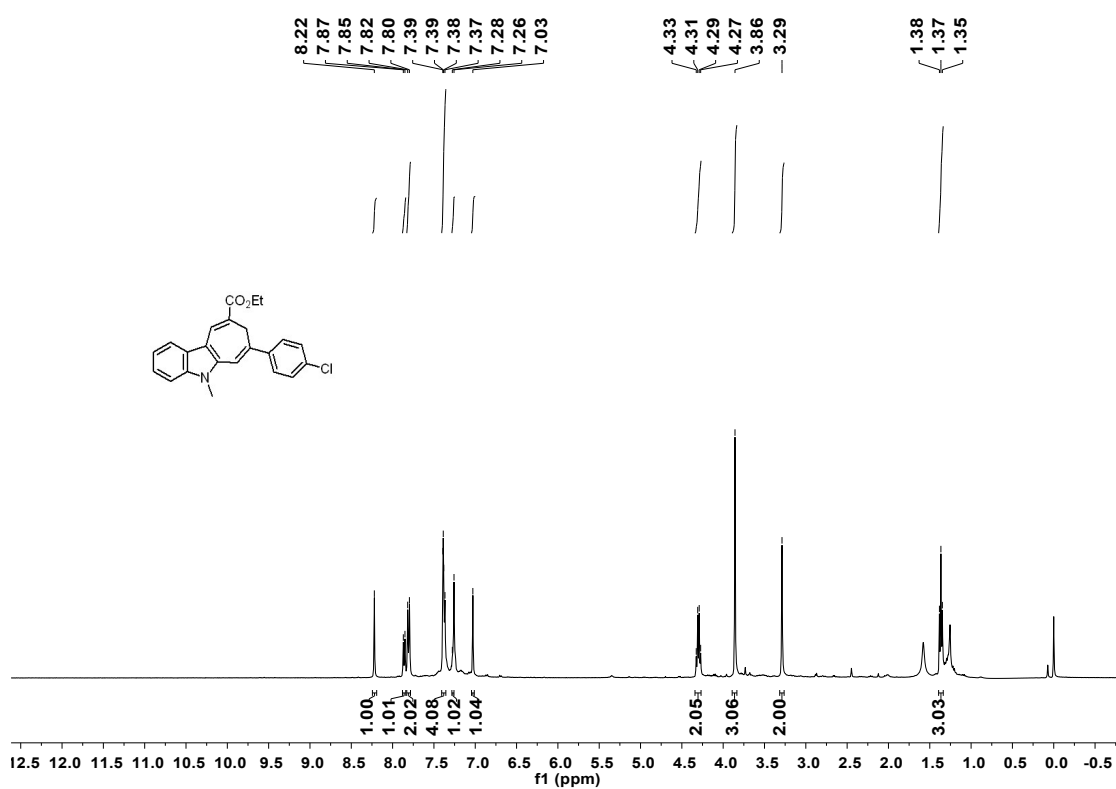

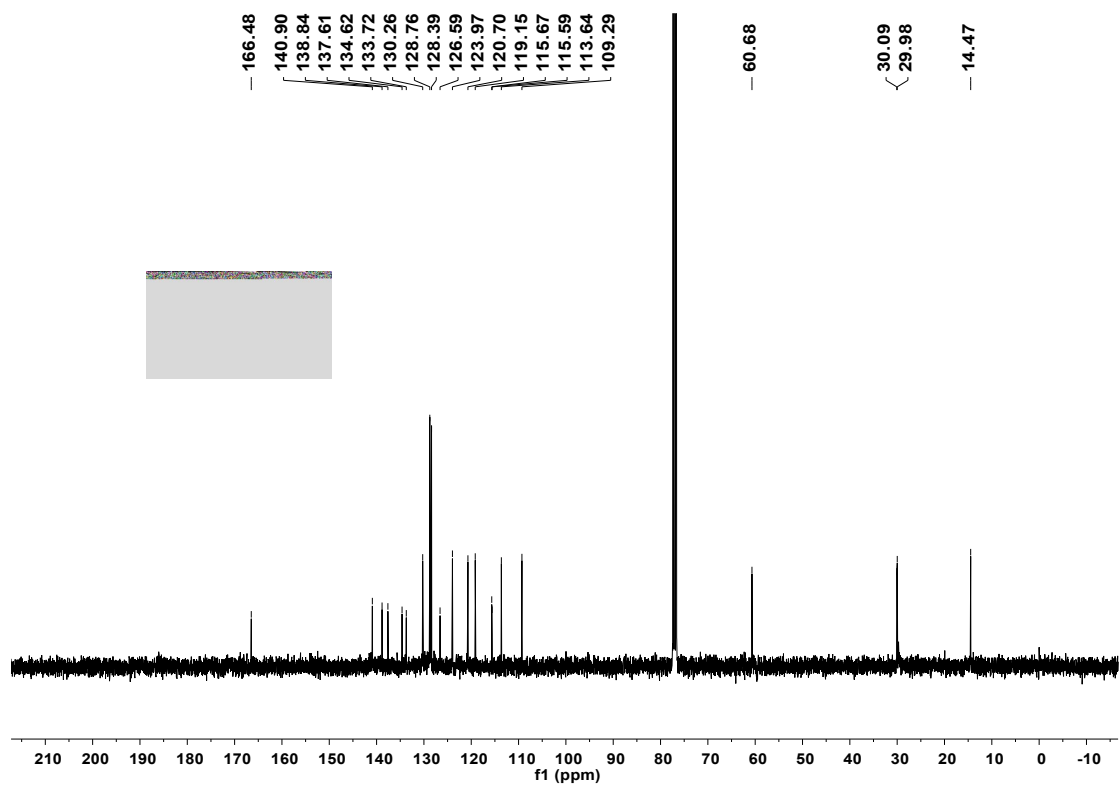

8a

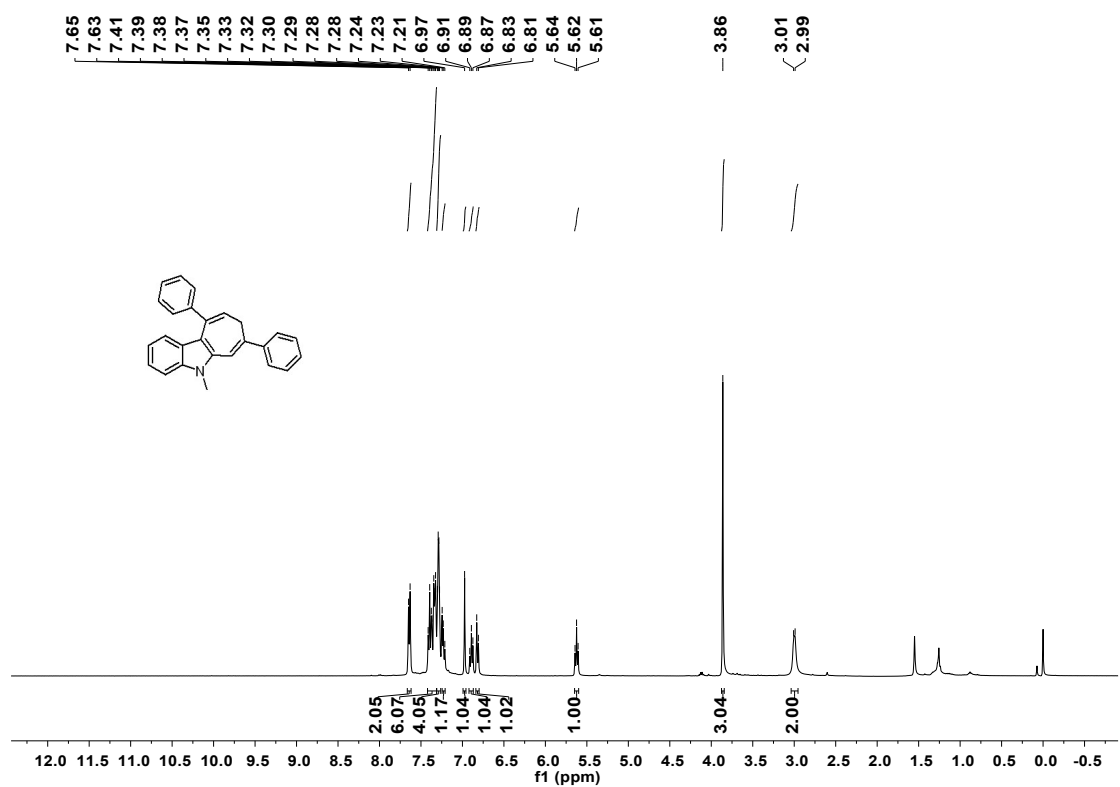

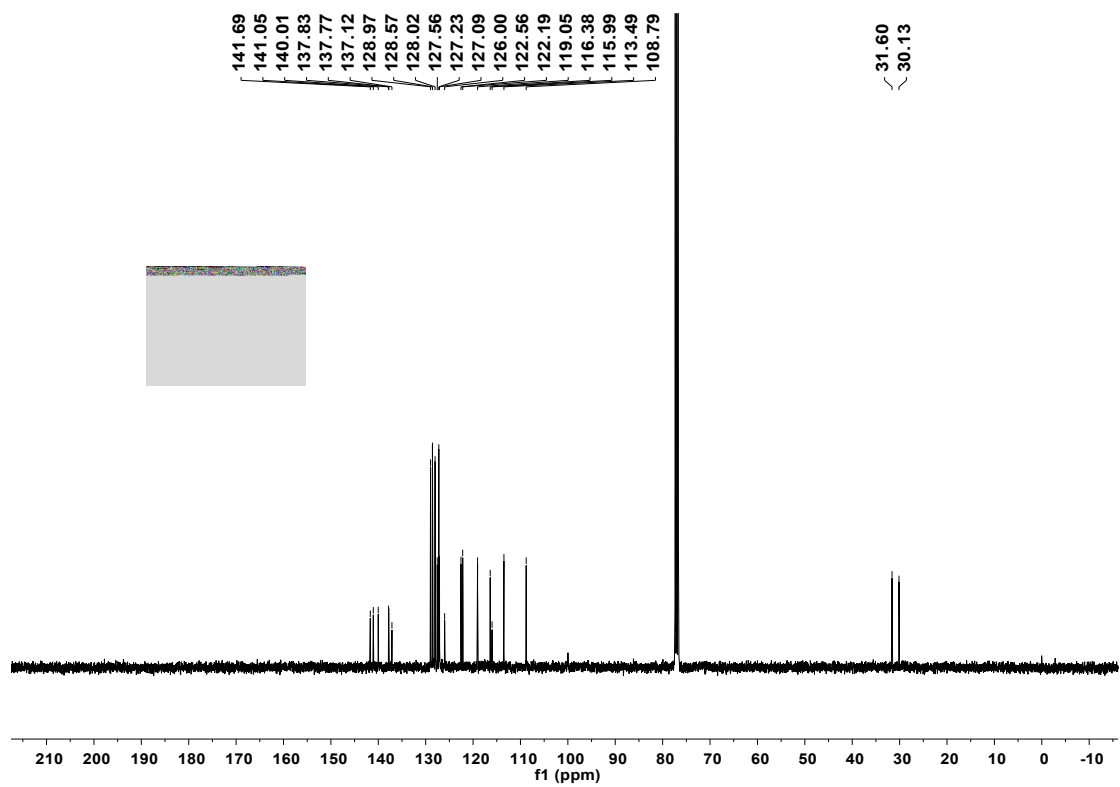

8b

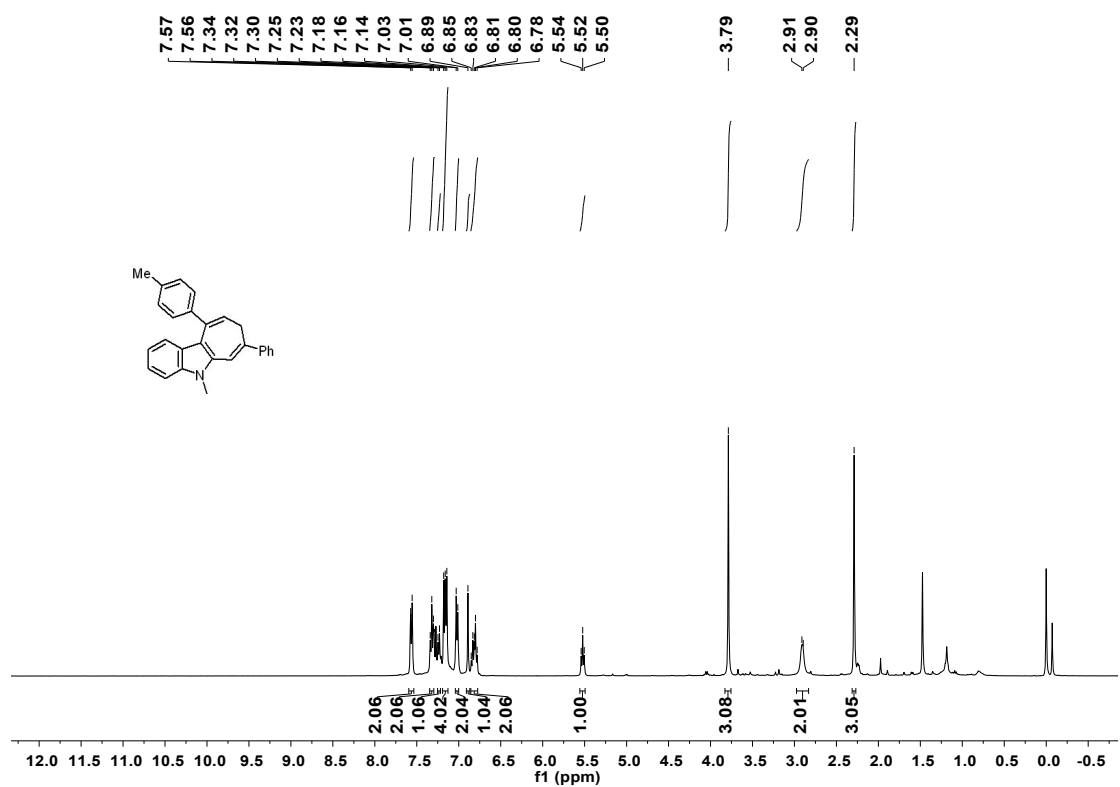

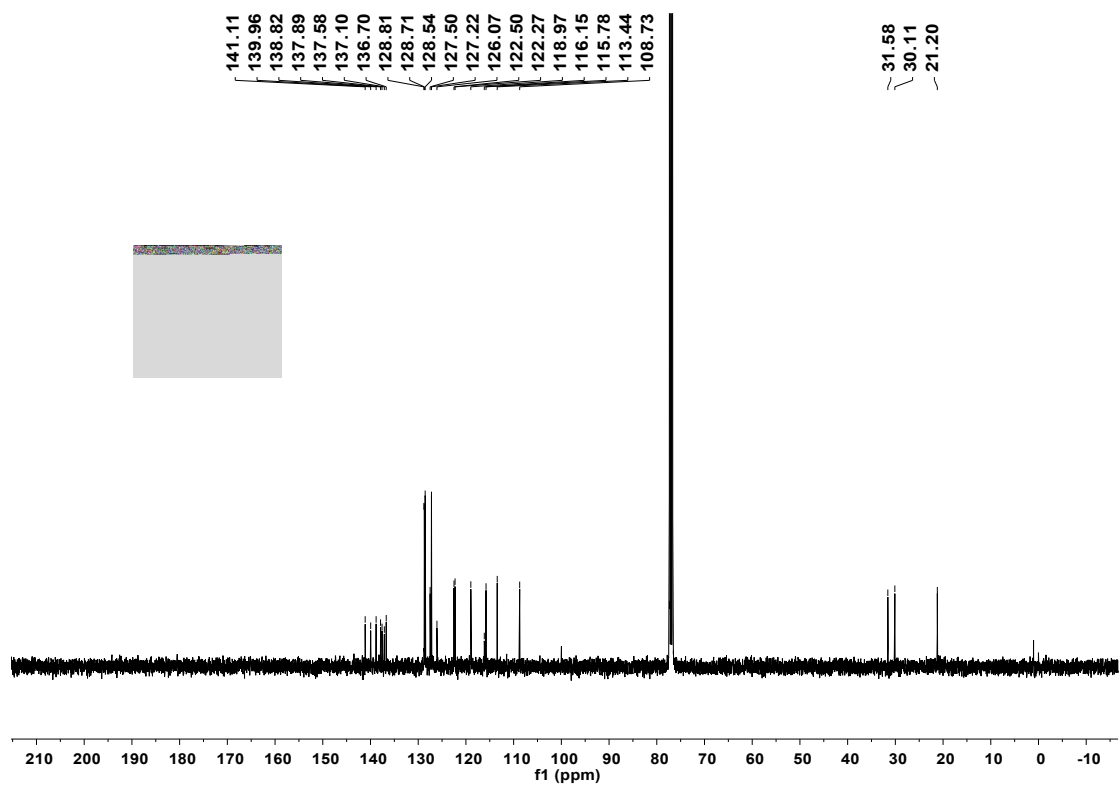

8c

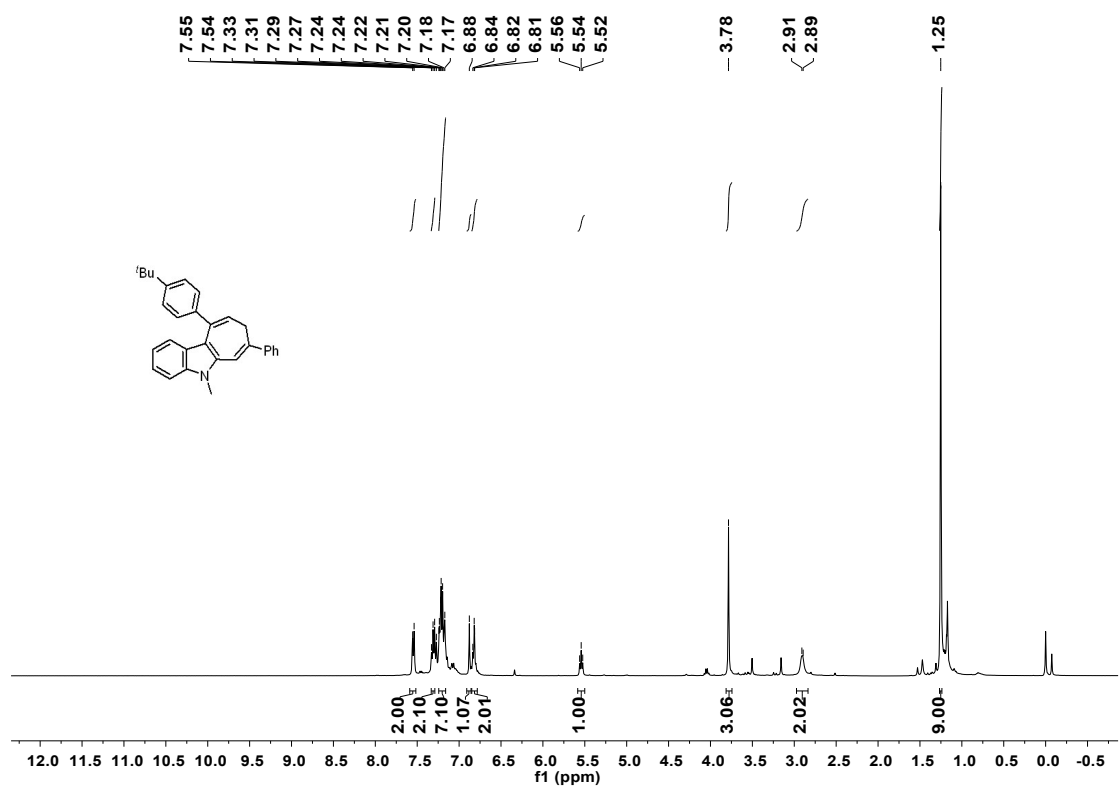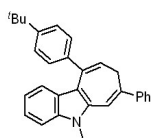

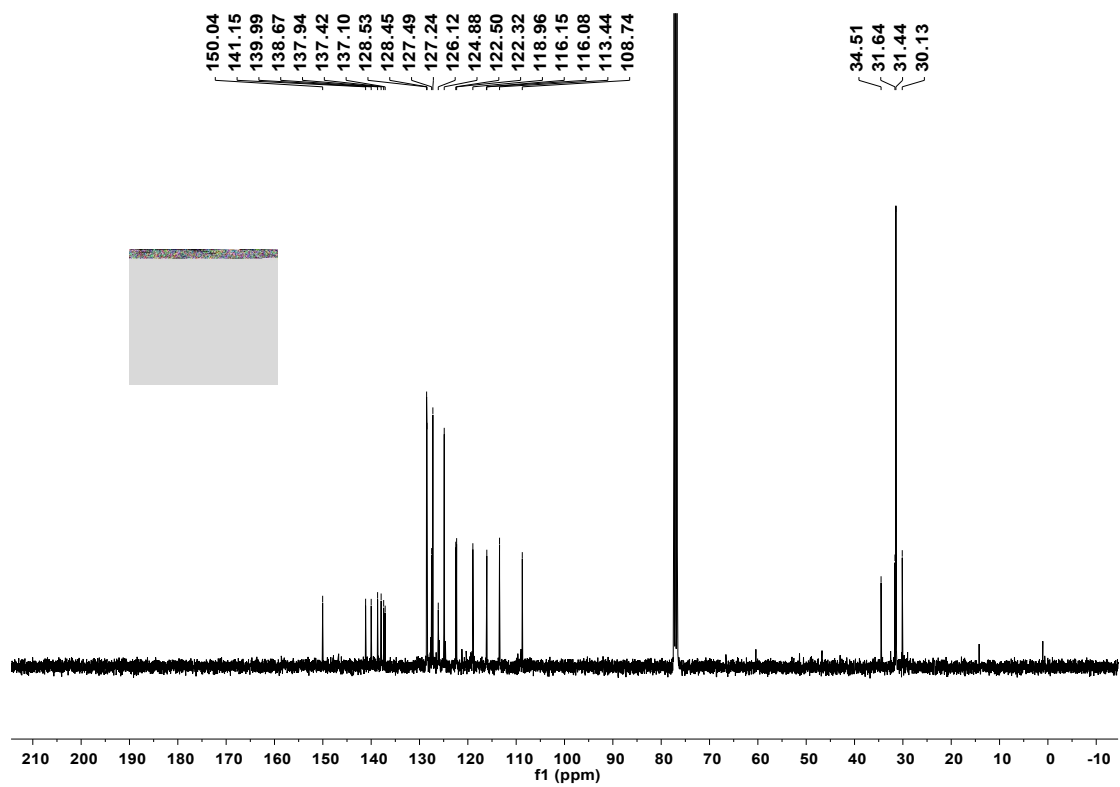

8d

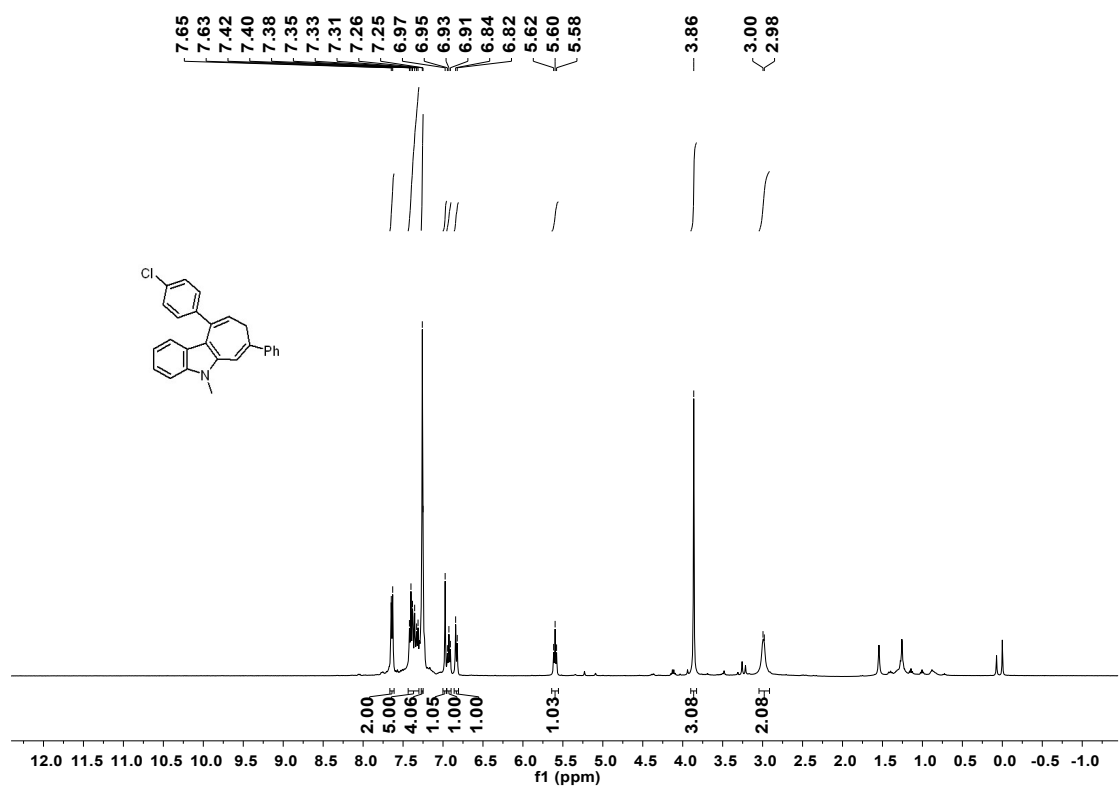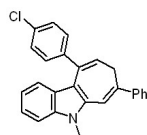

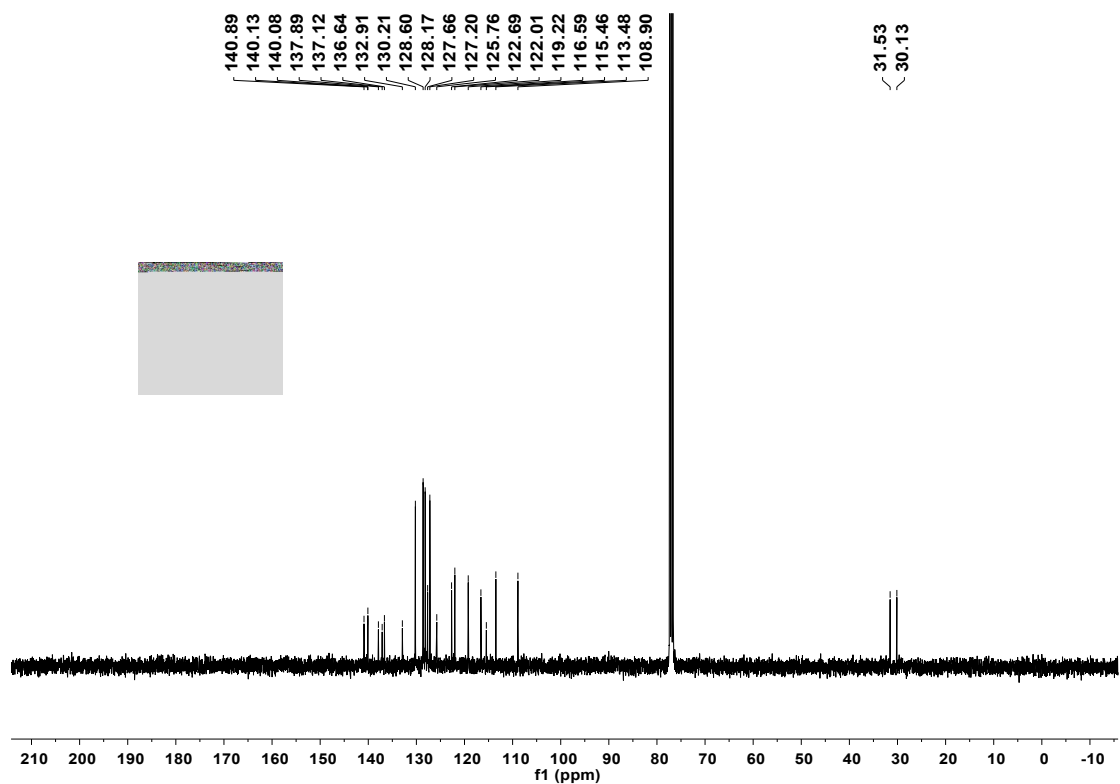

8e

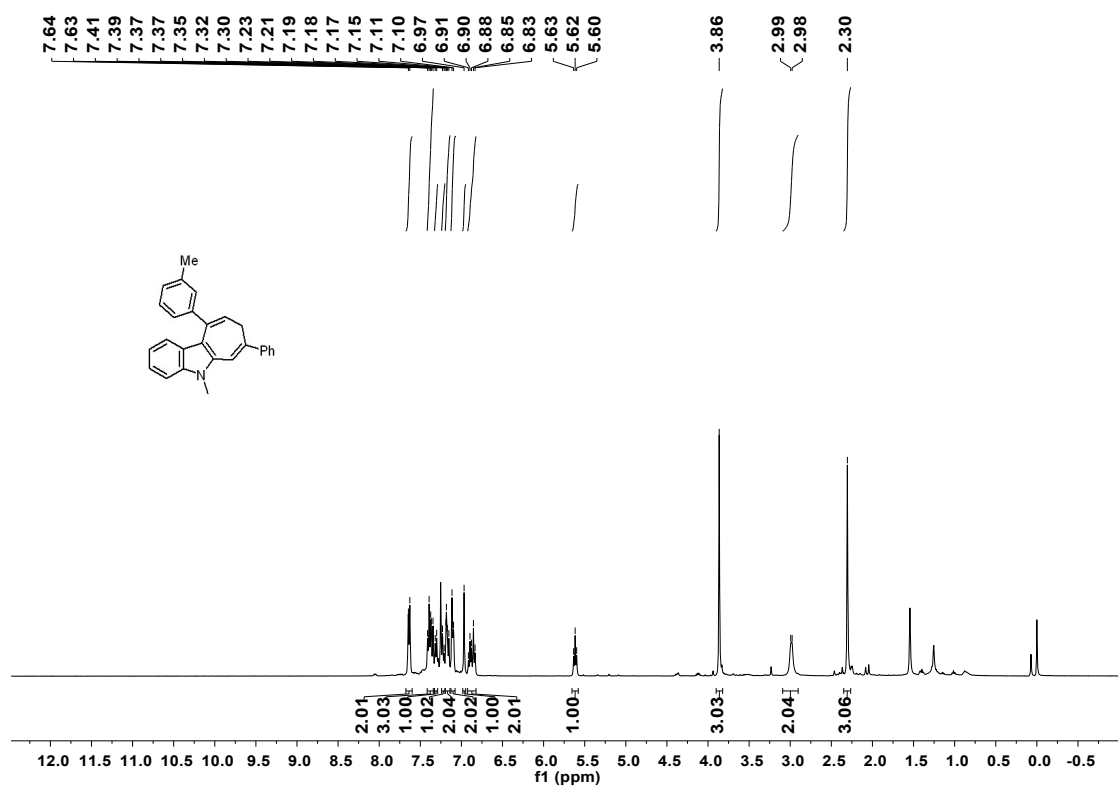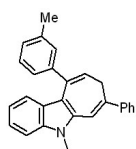

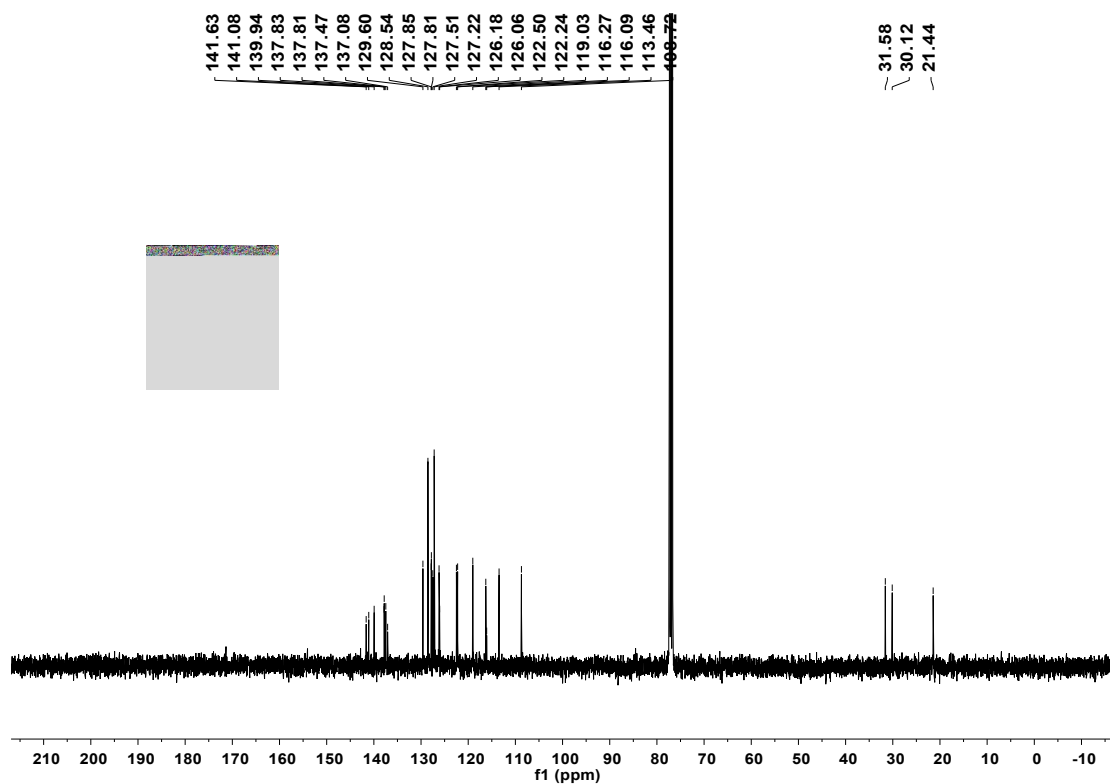

8f

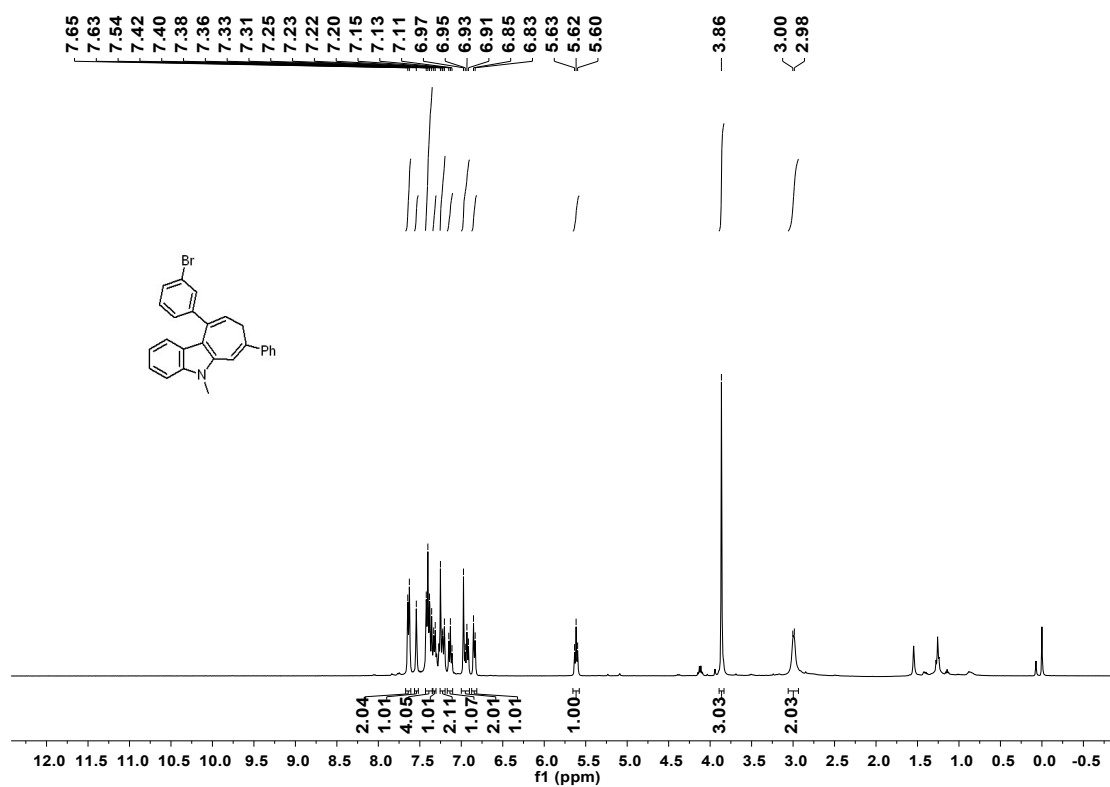



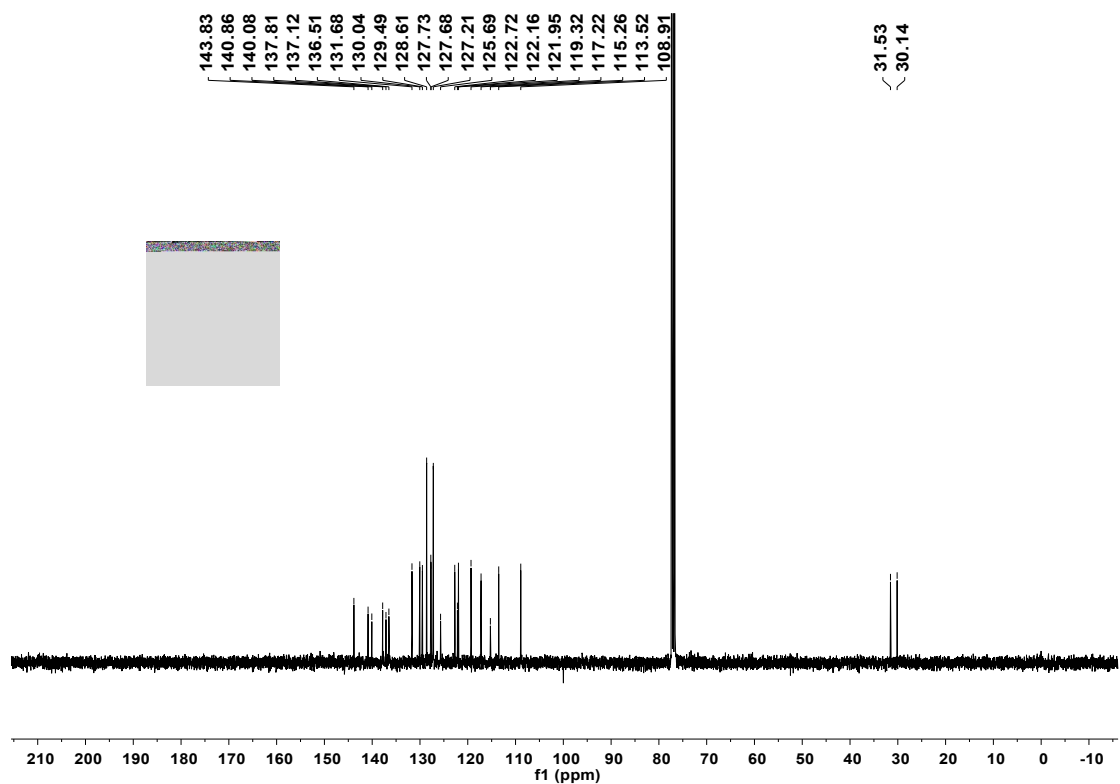

8g

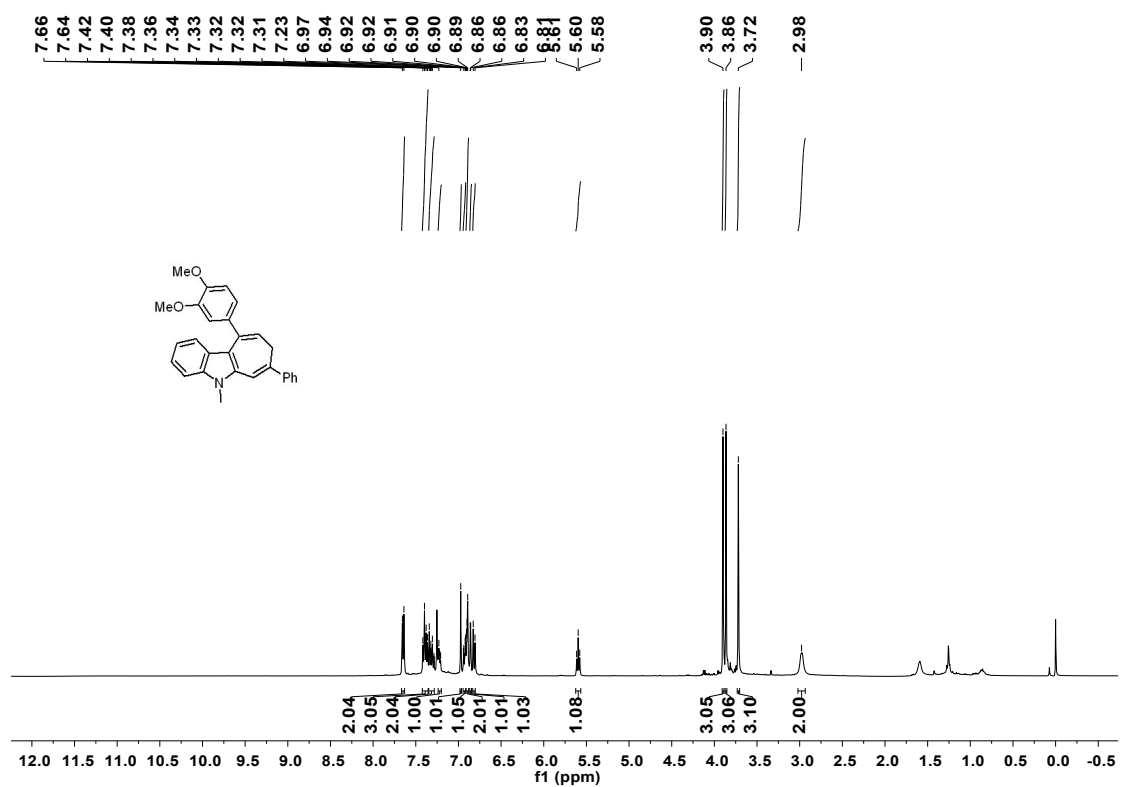

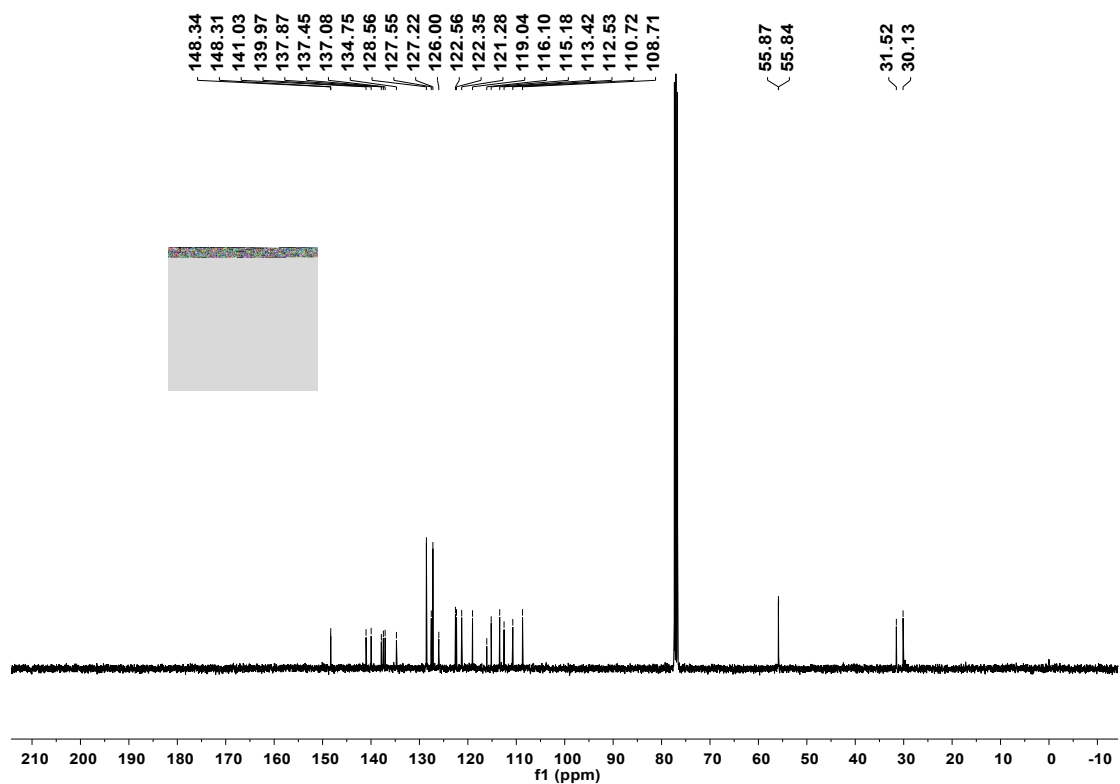

**8h**

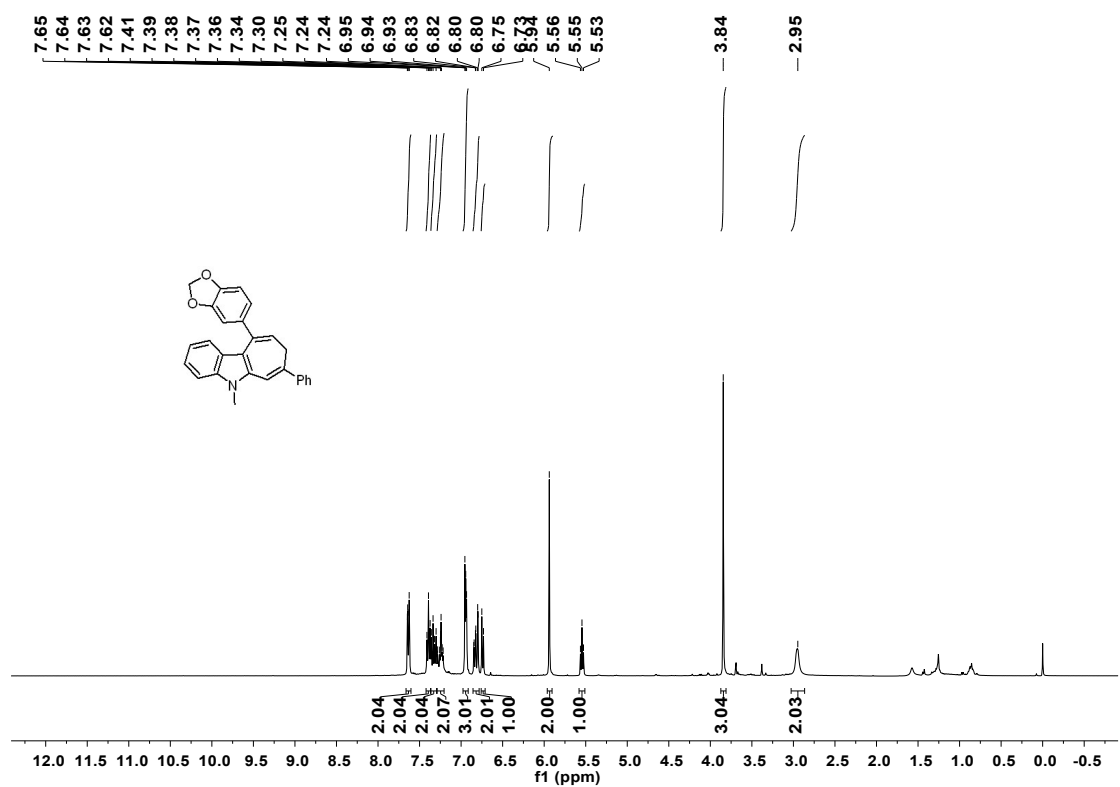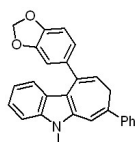

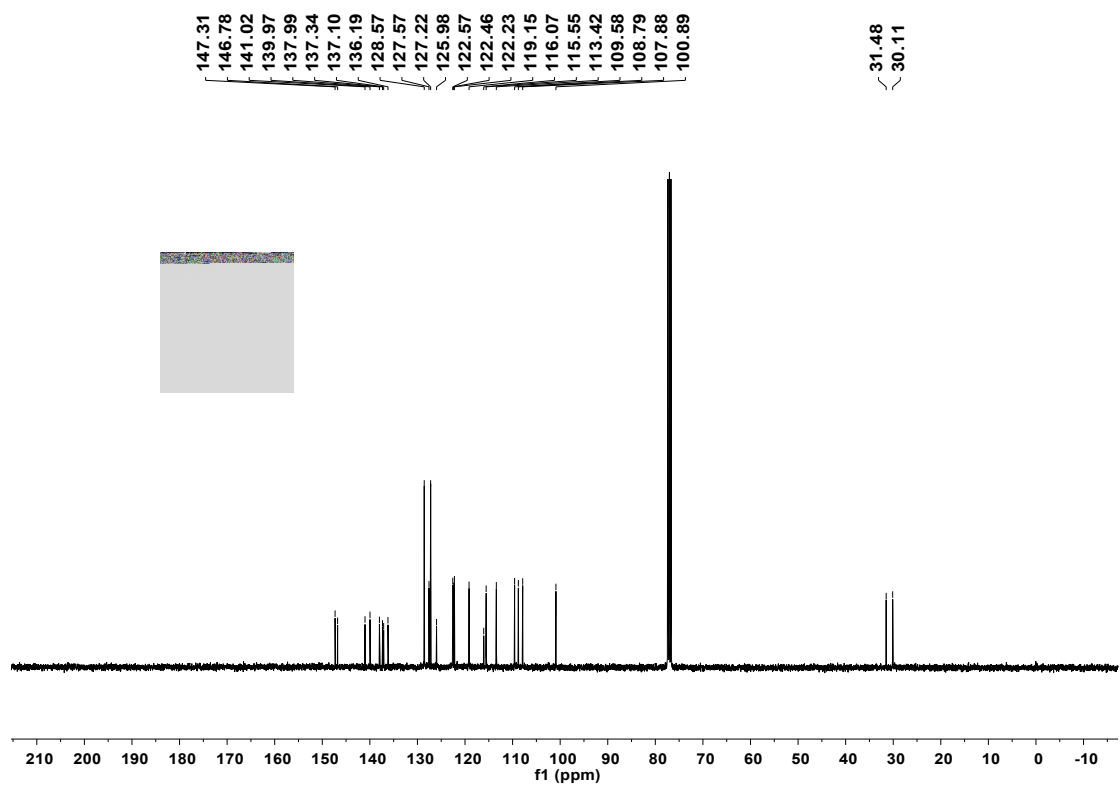

8i

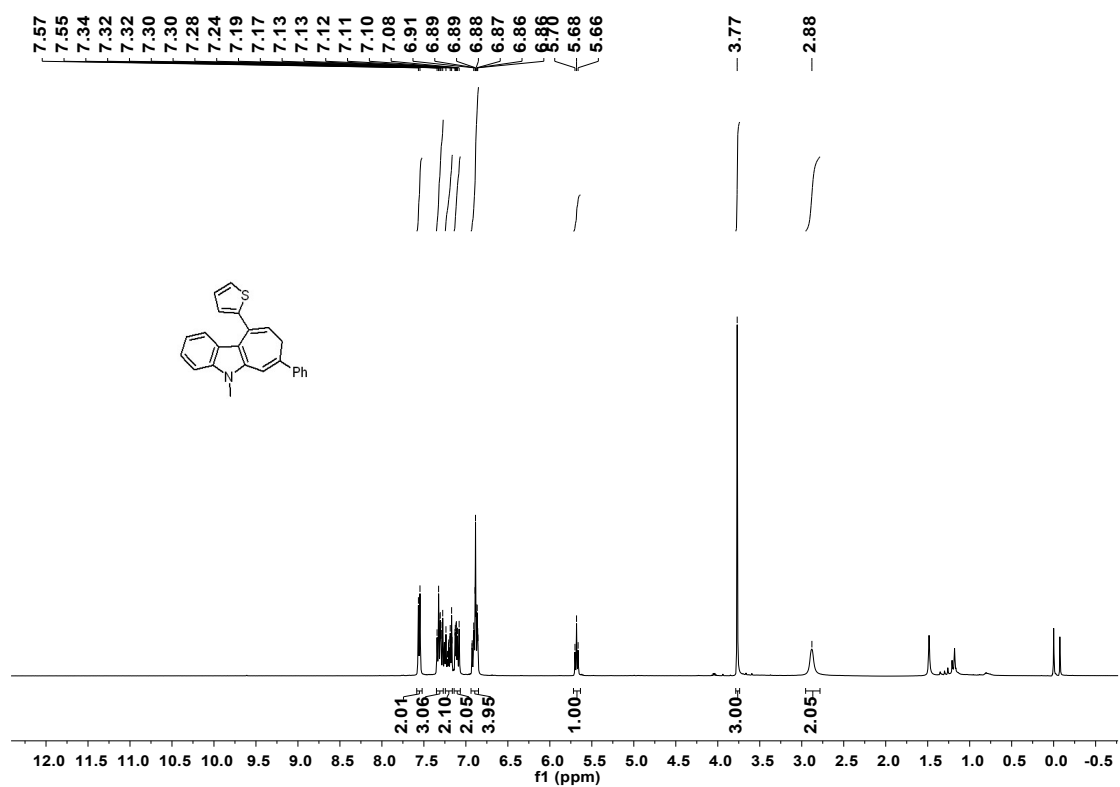

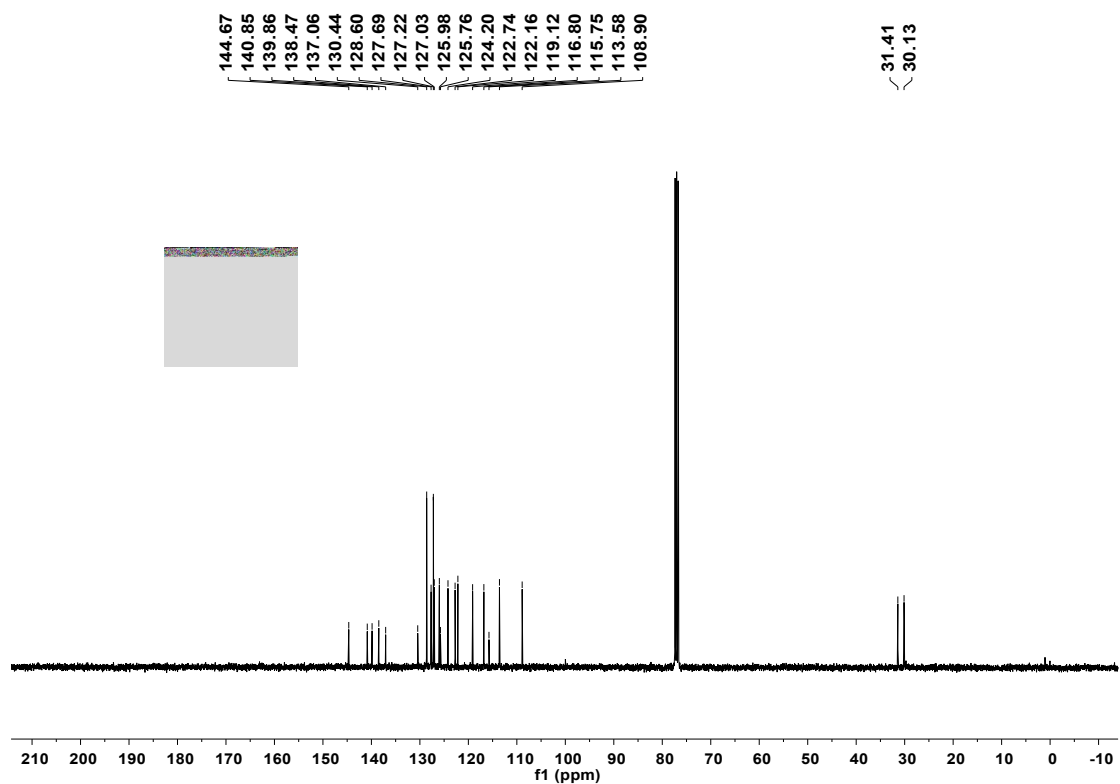

8j

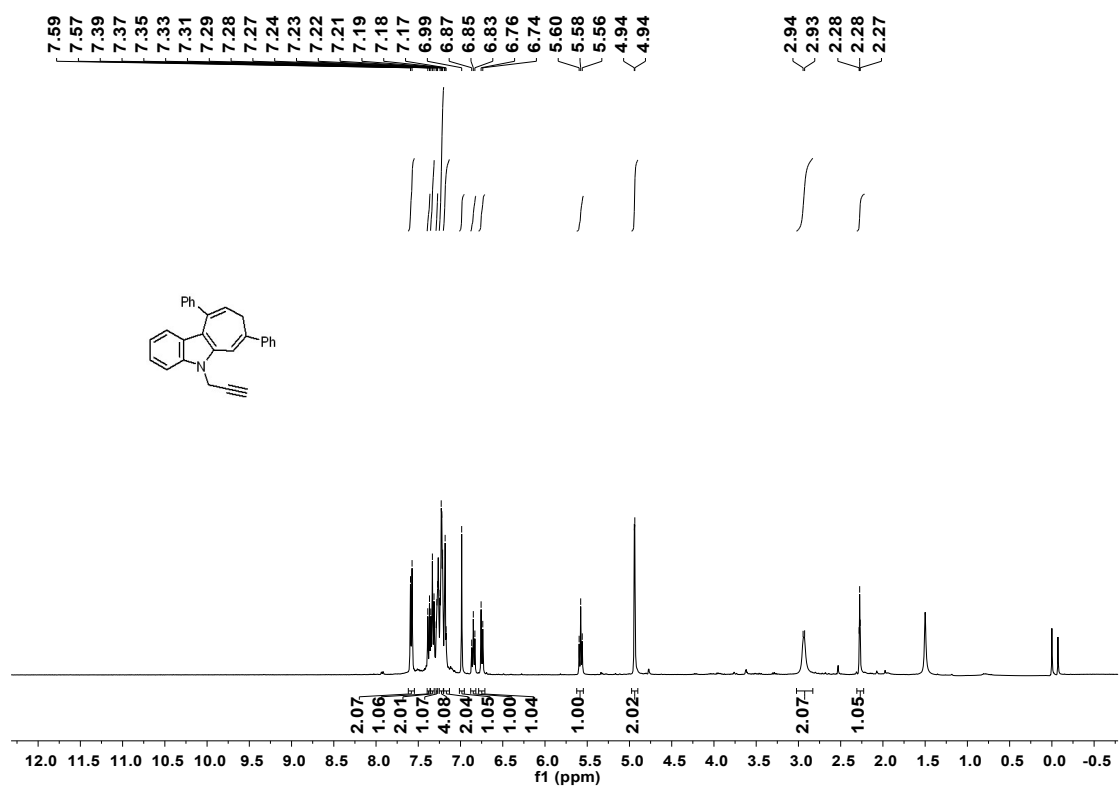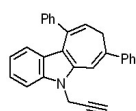

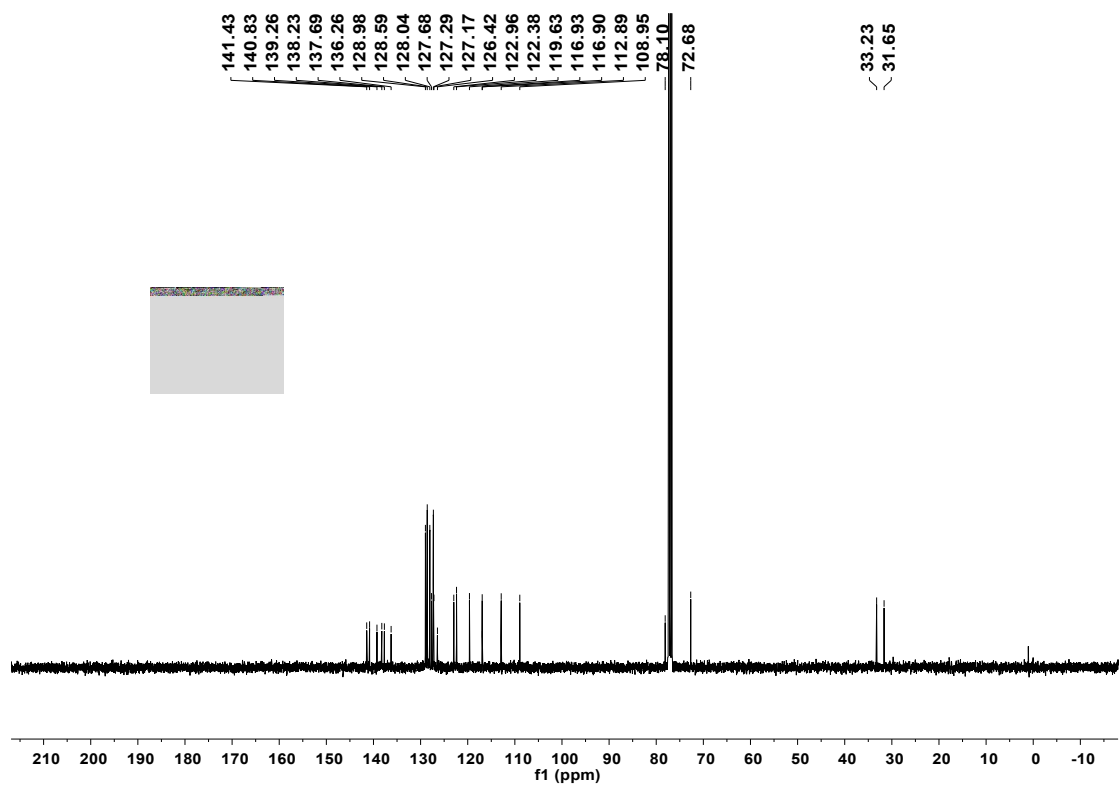

8k

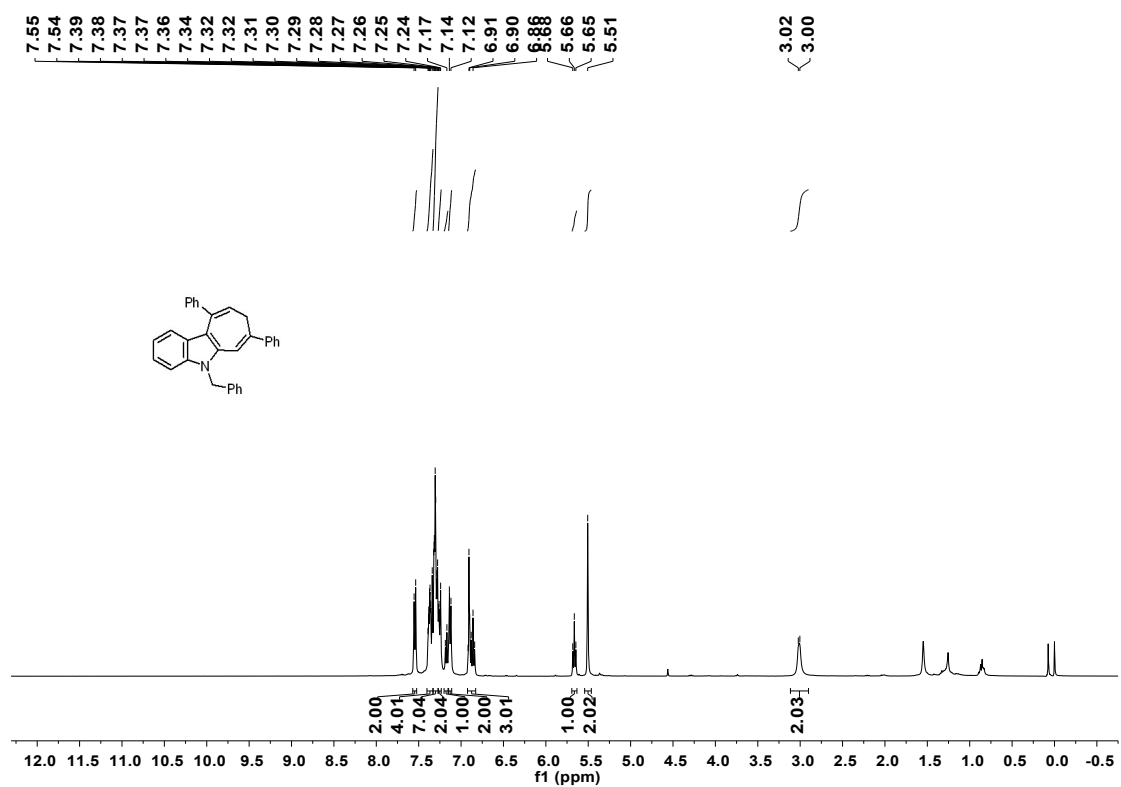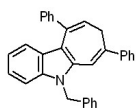

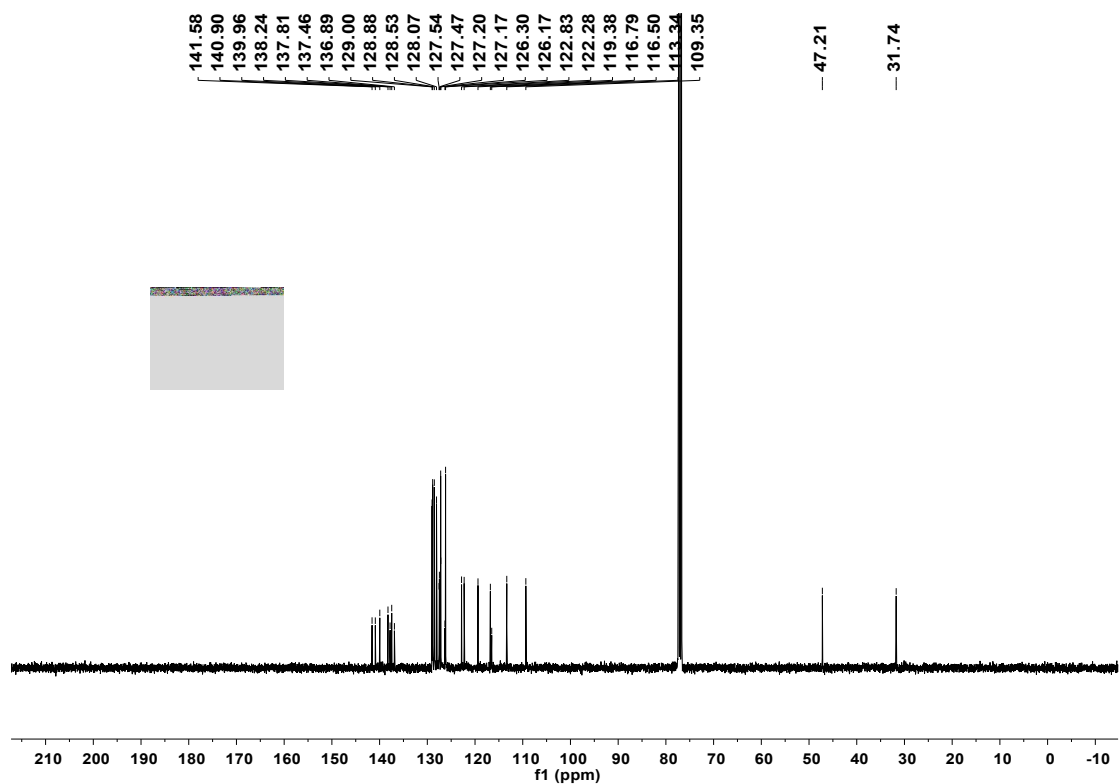

8l

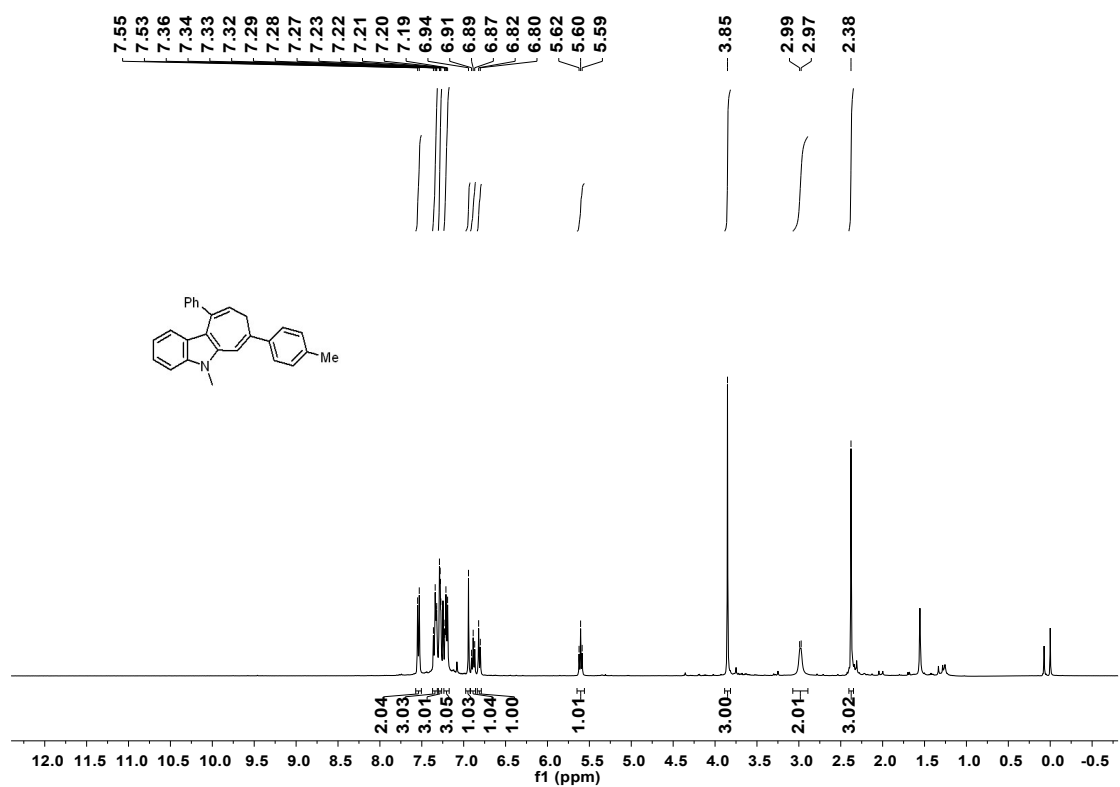

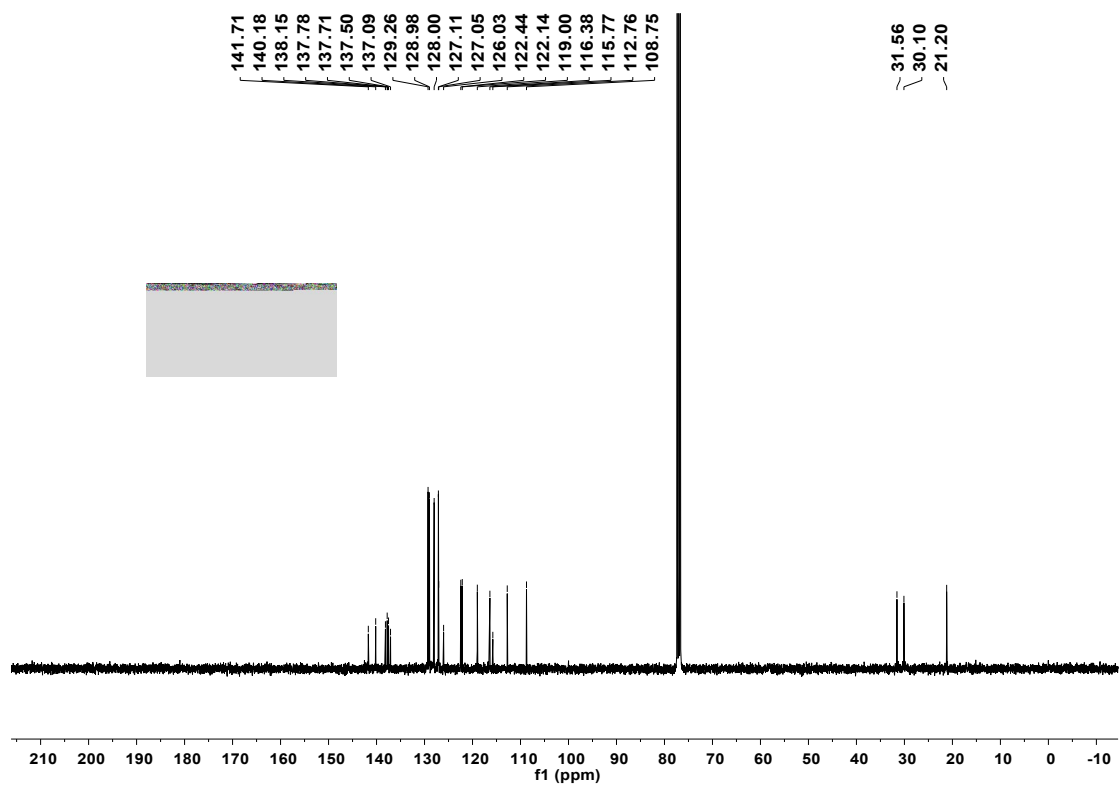

10a

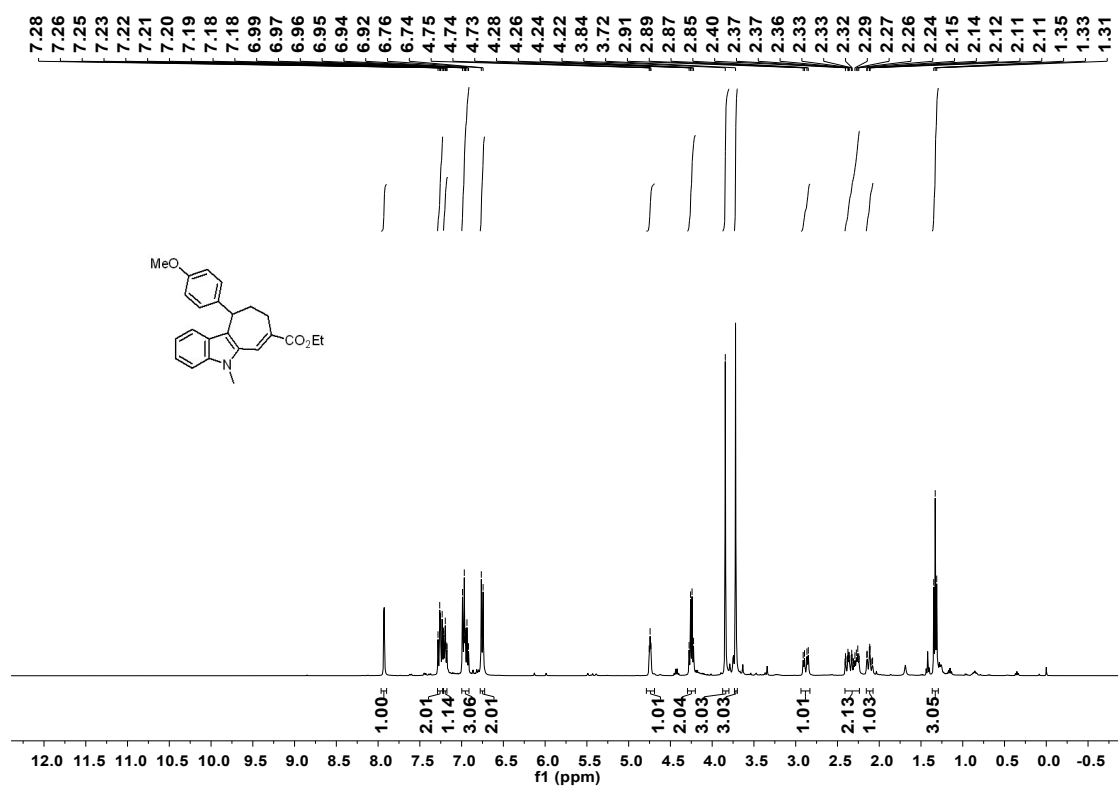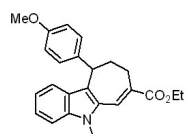

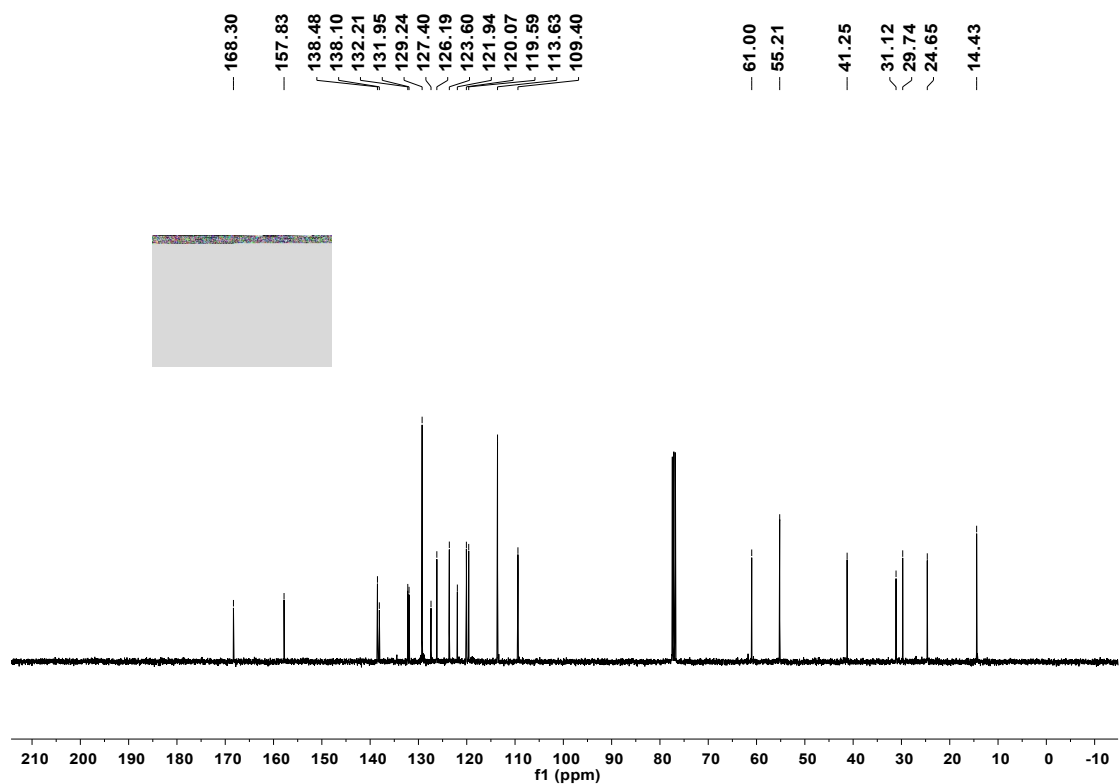

10b

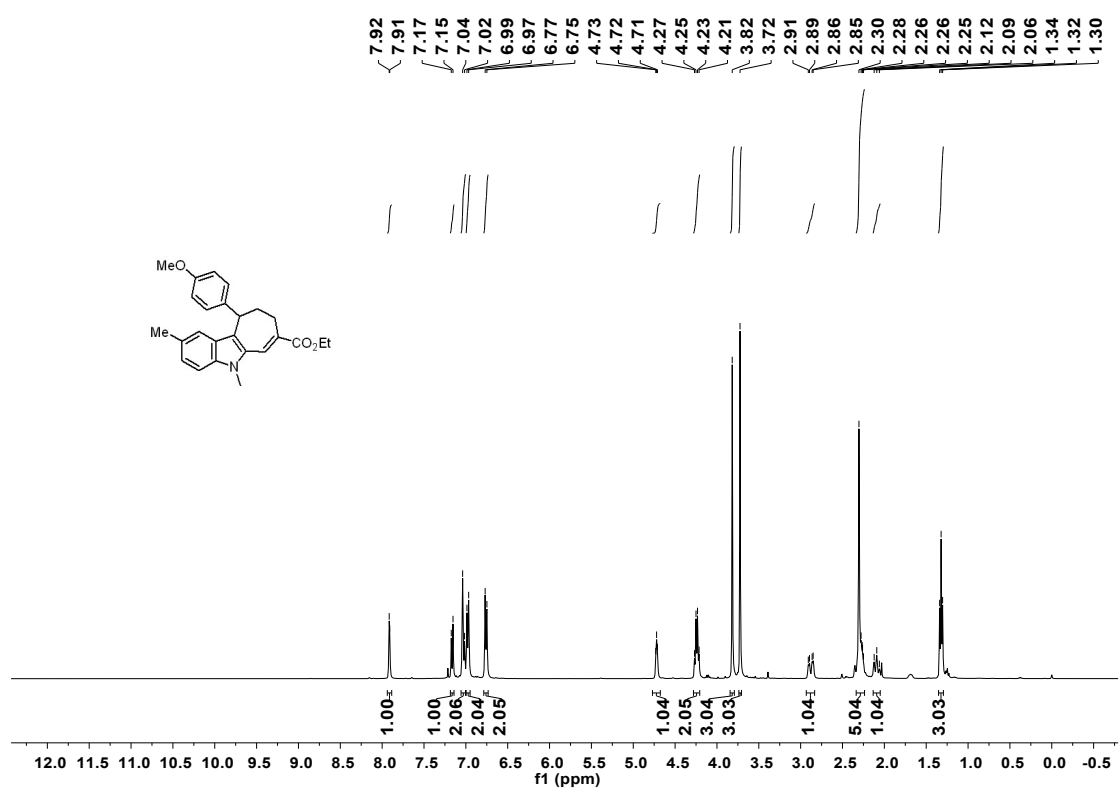



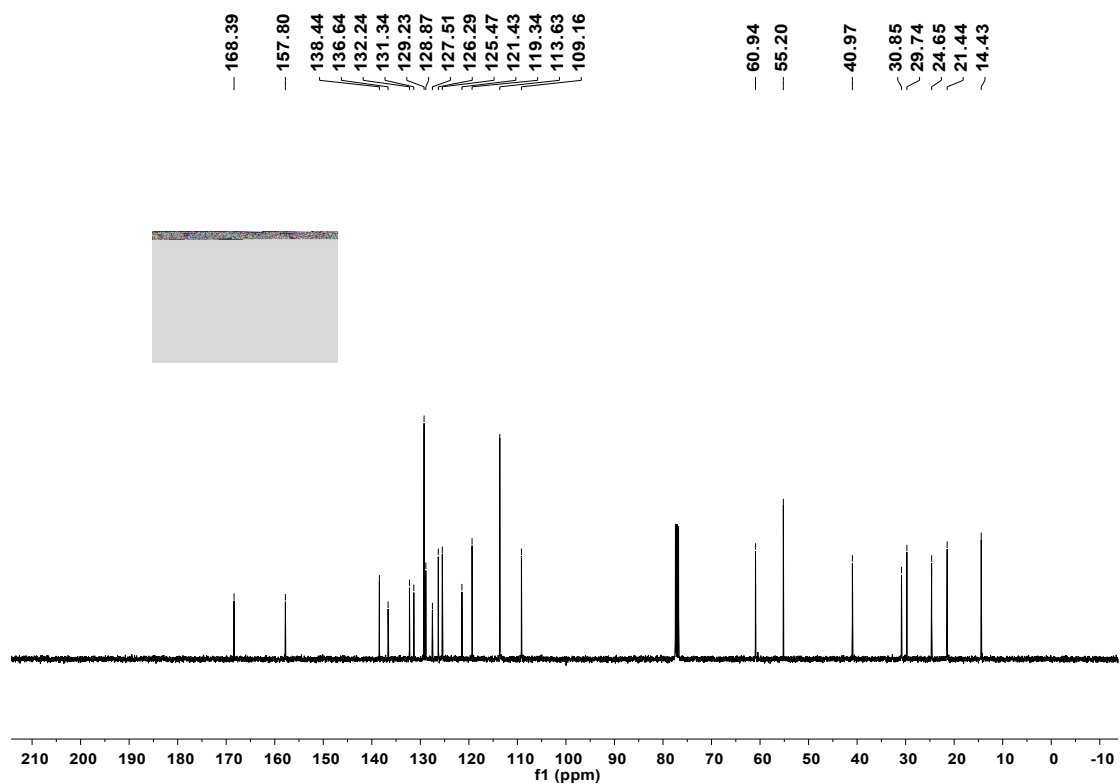

10c

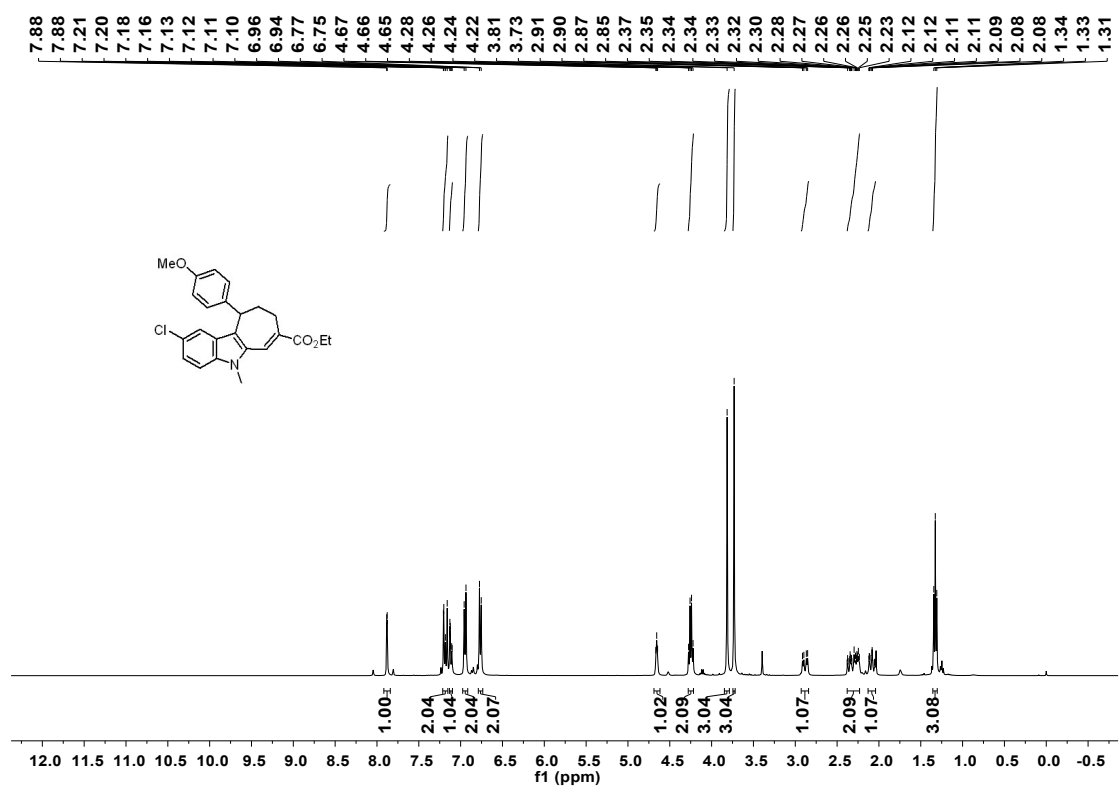

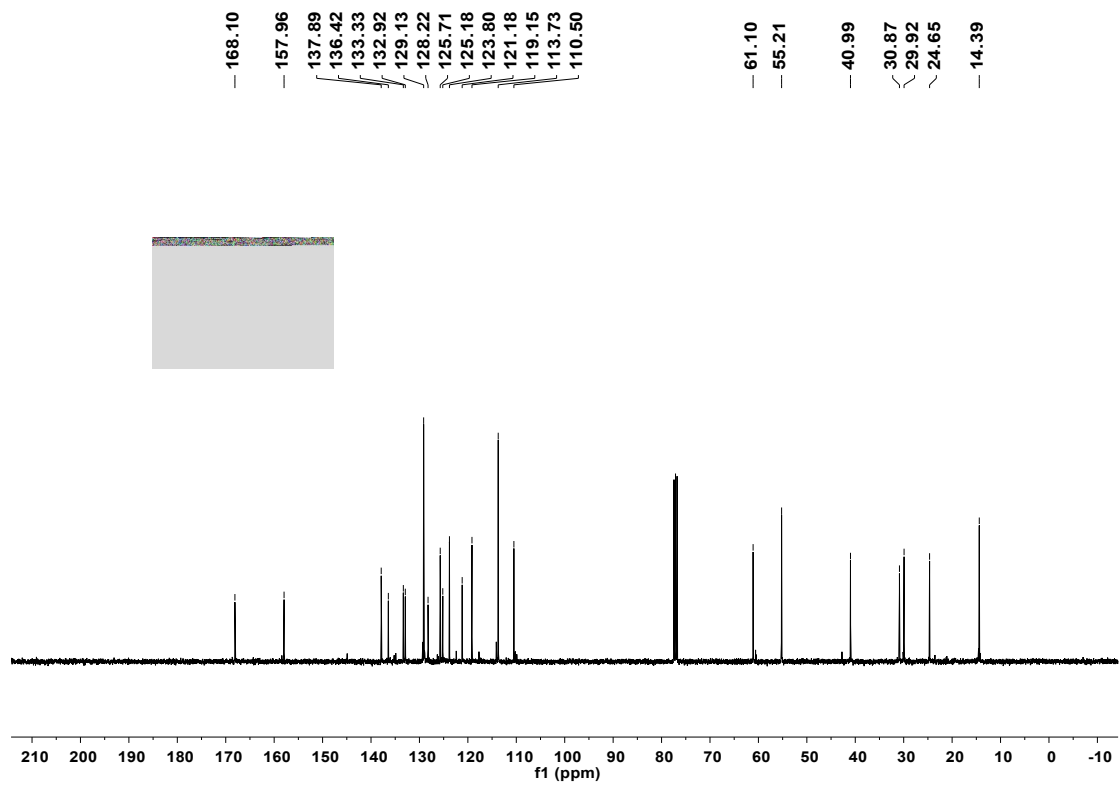

10d

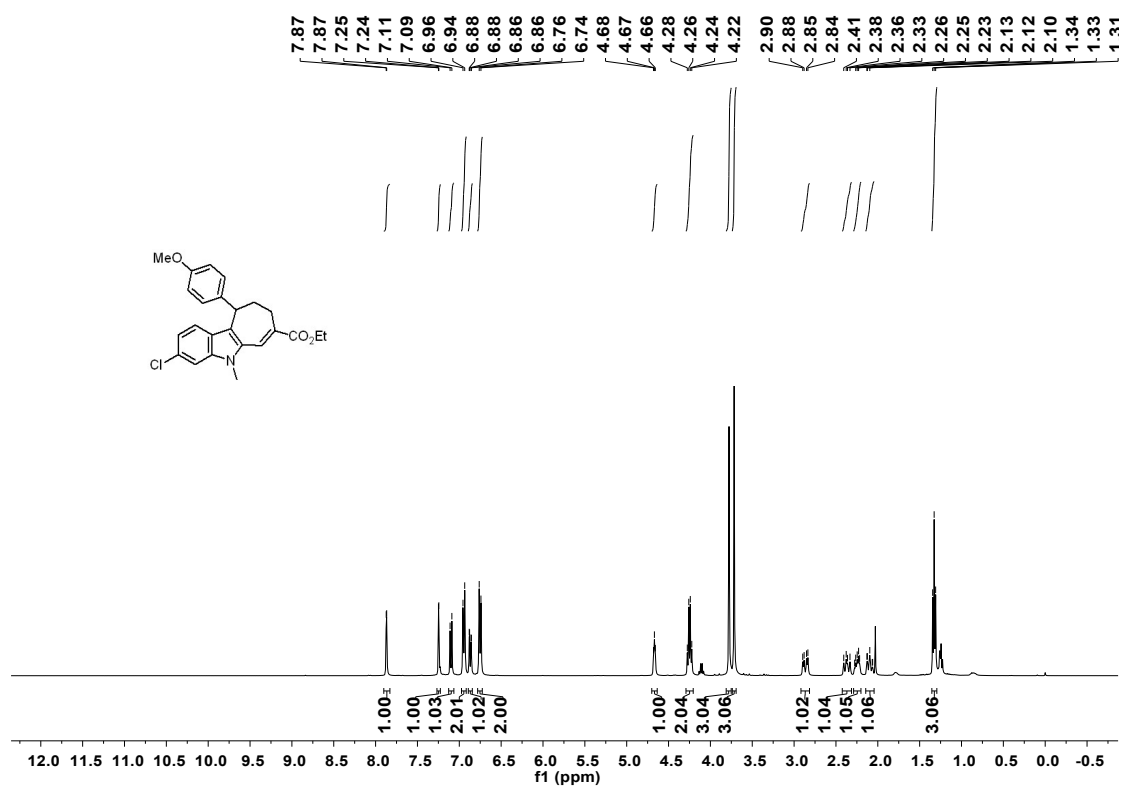

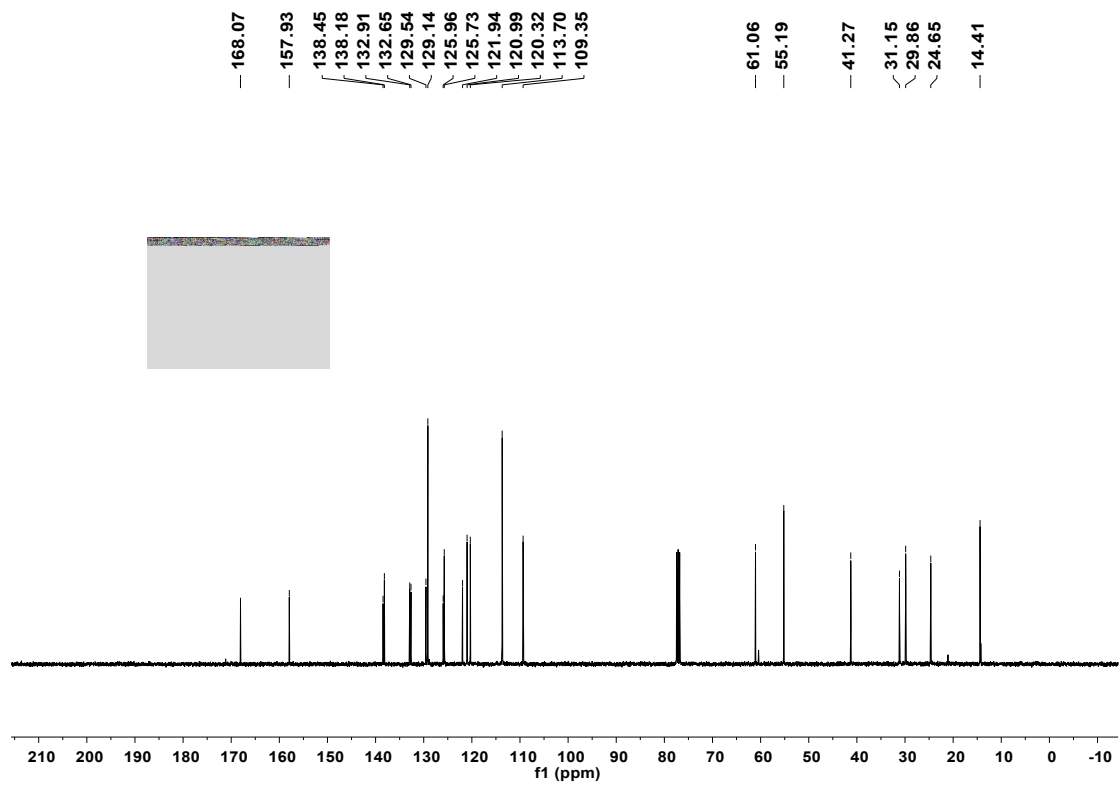

10e

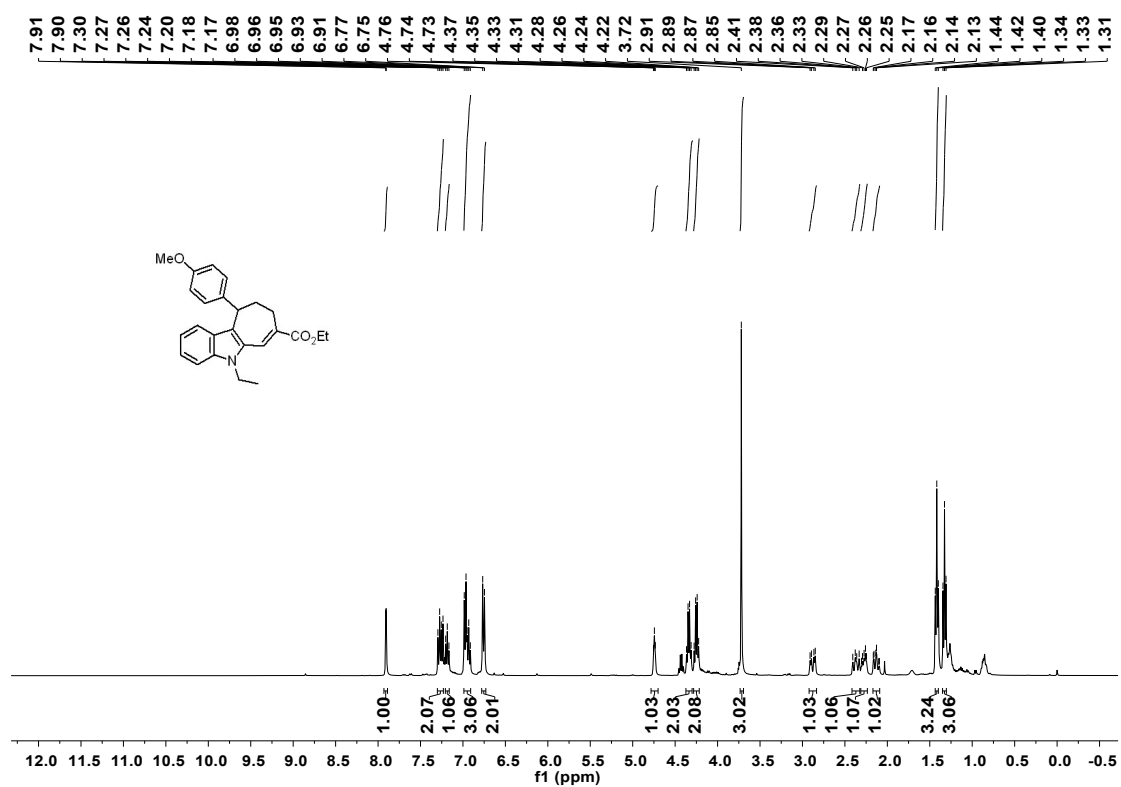

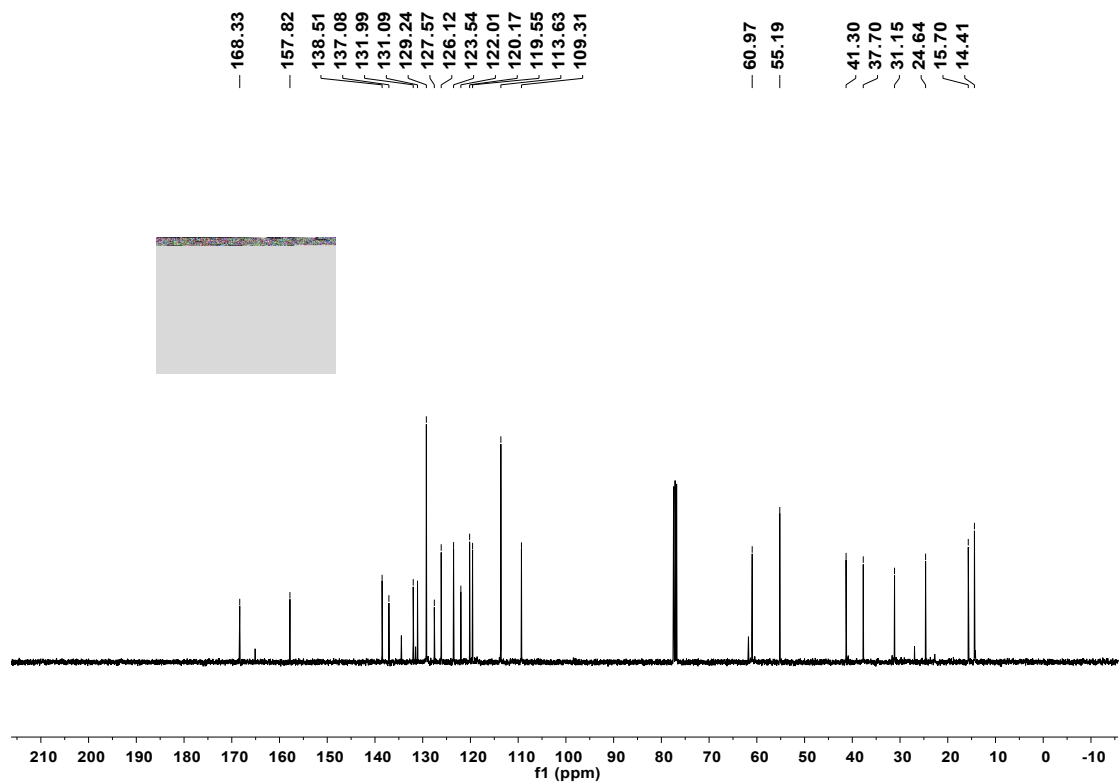

10f

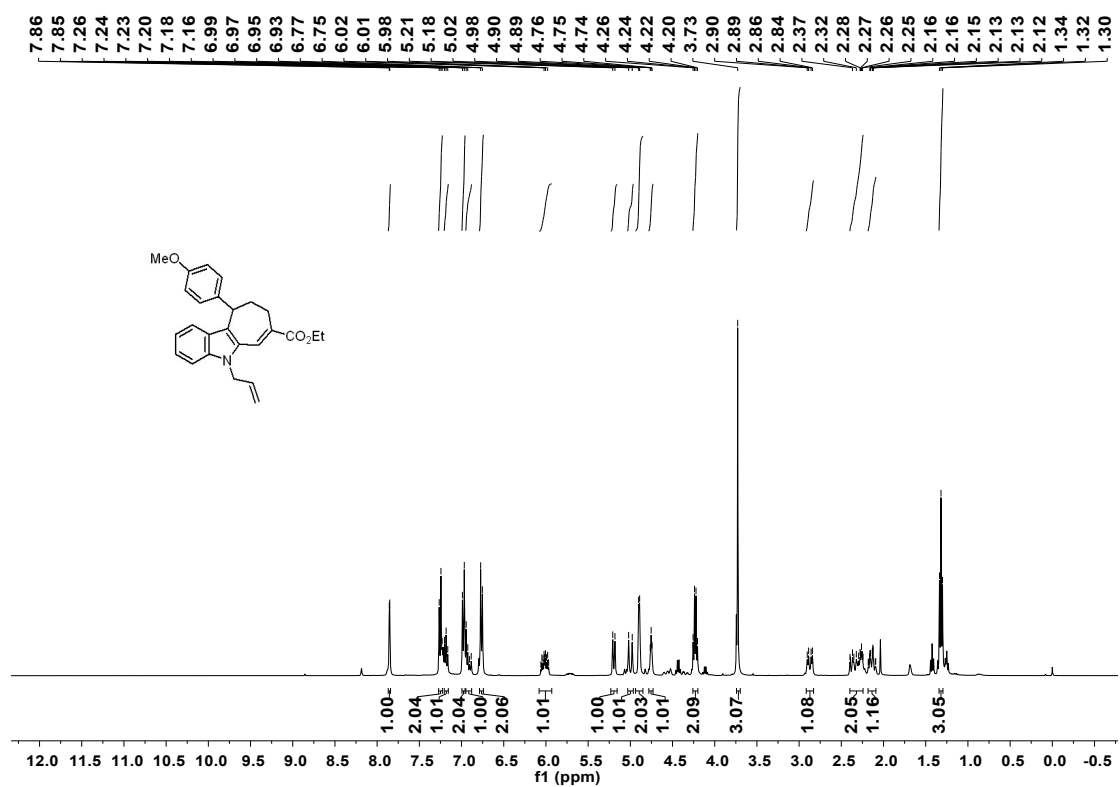

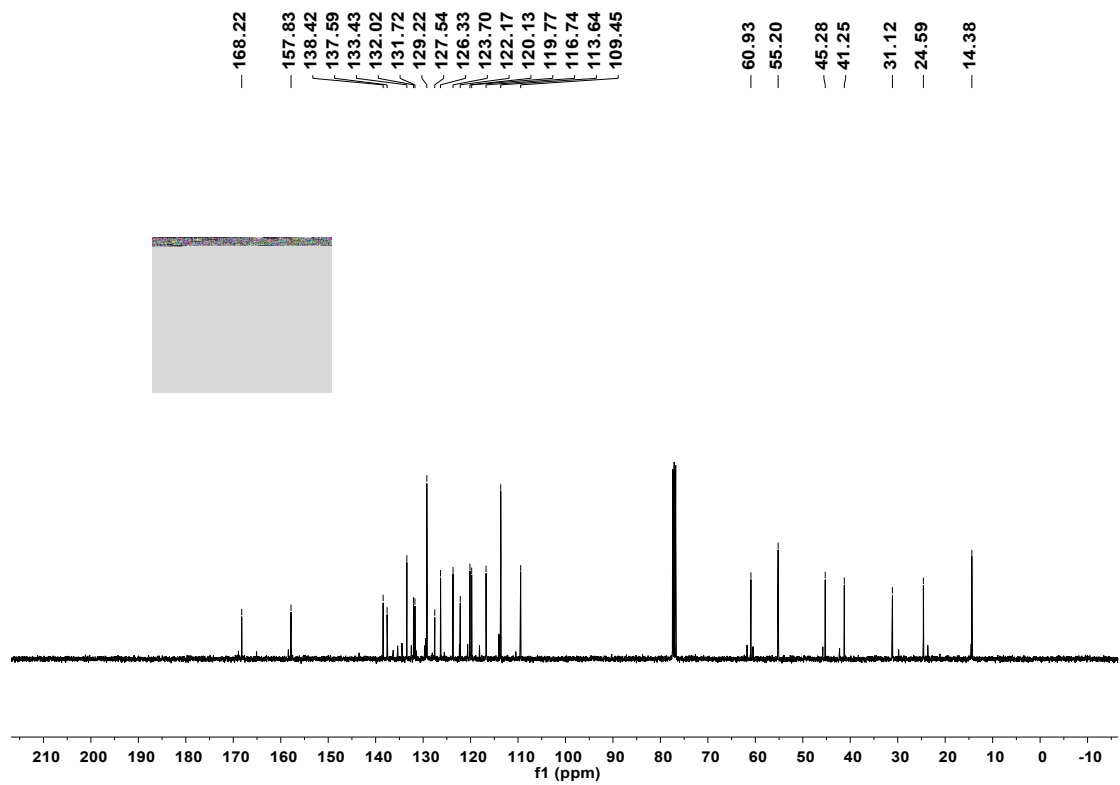

11a

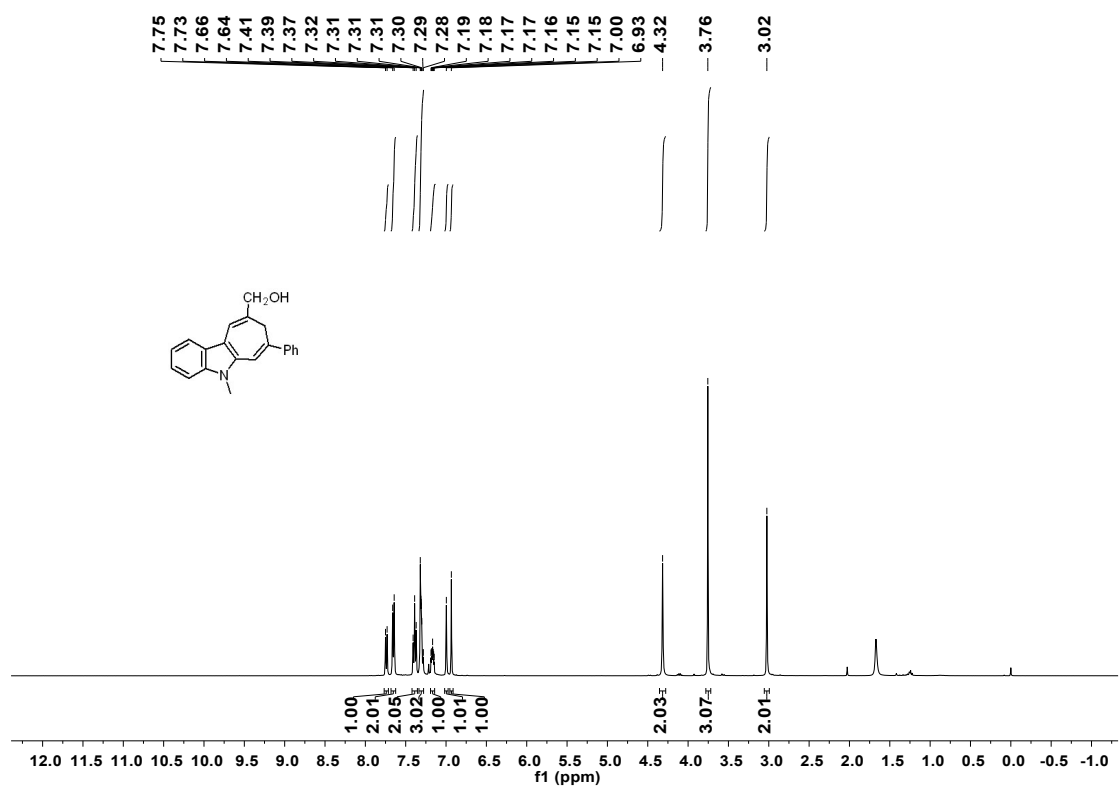

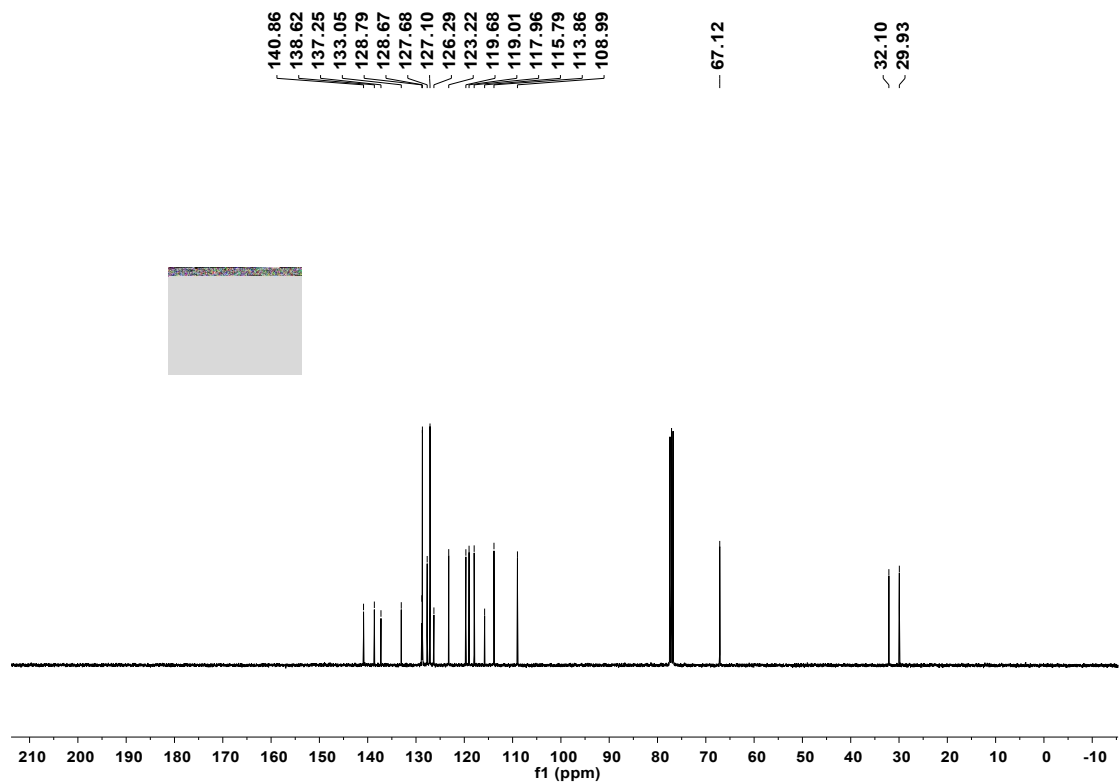

12a

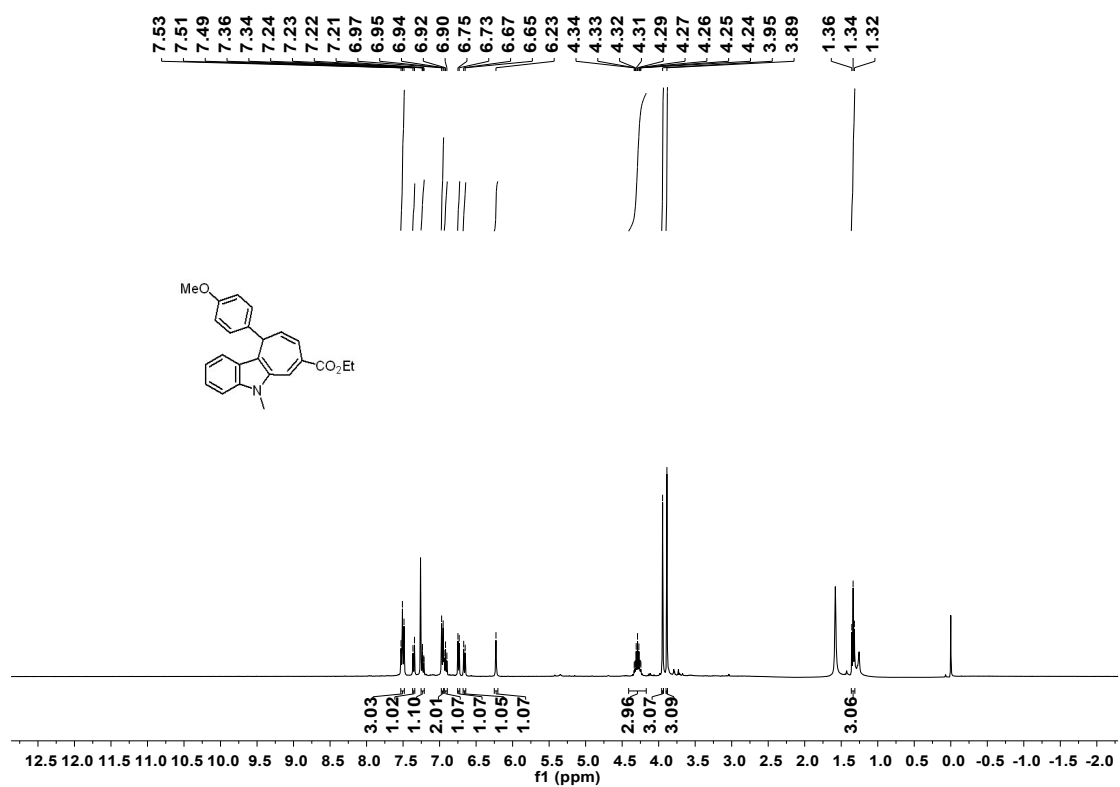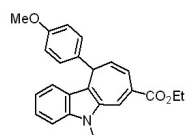

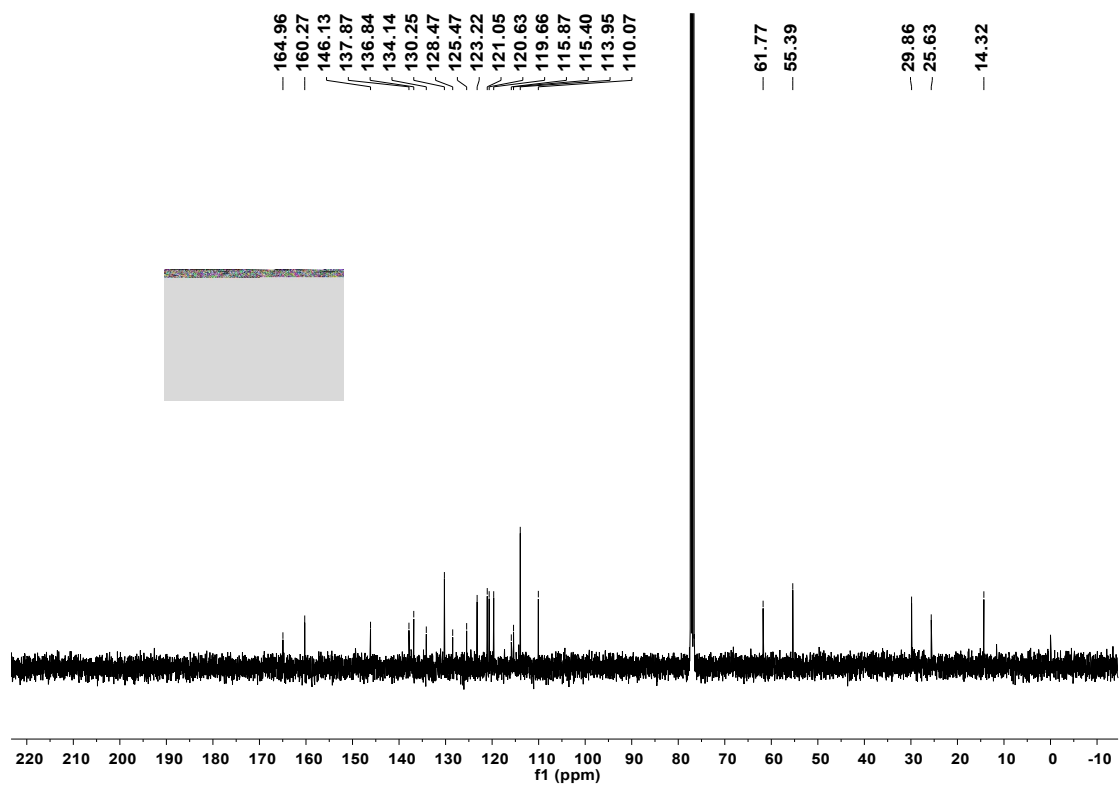

Supplement: d2gc02072f1.pdf [file d2gc02072f1.pdf]
